# Supplementary material for: In utero origin of myelofibrosis presenting in adult monozygotic twins
Source: PubMed Central journal article supplement (PMC9205768; doi:10.1038/s41591-022-01793-4), 2022-05-30
Supplement: 41591_2022_1793_MOESM1_ESM.pdf [file 41591_2022_1793_MOESM1_ESM.pdf]

---

**Supplementary information**

---

**In utero origin of myelofibrosis presenting  
in adult monozygotic twins**

---

In the format provided by the  
authors and unedited

## Supplementary Information

Supplement to: Sousos N. et al. *In utero* origin of myelofibrosis presenting in adult monozygotic twins.

### Table of Contents

|                                                                                                                                                                                          |                 |
|------------------------------------------------------------------------------------------------------------------------------------------------------------------------------------------|-----------------|
| <b>Supplementary Figure 1. Gating strategy for (a) T cell flow cytometry analysis and (b) HSPC index sorting.....</b>                                                                    | <b><i>i</i></b> |
| <b>Supplementary Table 1. Catalogue of somatic substitutions and indels in twin A and twin B.....</b>                                                                                    | <b>1</b>        |
| <b>Supplementary Table 2. Catalogue of somatic structural variants in twin A and twin B .....</b>                                                                                        | <b>38</b>       |
| <b>Supplementary Table 3. Summary of somatic mutations shared between twin A and twin B.....</b>                                                                                         | <b>39</b>       |
| <b>Supplementary Table 4. Summary of non-silent coding variants in twin A and twin B .....</b>                                                                                           | <b>41</b>       |
| <b>Supplementary Table 5. Data for time to the most recent common ancestor (MRCA) estimation .....</b>                                                                                   | <b>42</b>       |
| <b>Supplementary Table 6. Summary of the shared somatic variants and unique somatic variants for each twin, used in whole genome sequencing validation at the single-cell level.....</b> | <b>43</b>       |
| <b>Supplementary Table 7. Overview of patient clinical information for the JAK2V617F-mutant myeloproliferative neoplasm cohort.....</b>                                                  | <b>44</b>       |
| <b>Supplementary Table 8. Flow cytometry and cell sorting panels used in granulocyte, T cell and HSPC analysis and sorting .....</b>                                                     | <b>45</b>       |
| <b>Supplementary Table 9. Catalogue of oligonucleotides used in the polymerase chain reaction assays.....</b>                                                                            | <b>46</b>       |
| <b>Supplementary Table 10. Catalogue of the genes targeted in the next-generation sequencing panel .....</b>                                                                             | <b>47</b>       |
| <b>Supplementary Table 11. Summary of multidimensional mutation clustering..</b>                                                                                                         | <b>49</b>       |
| <b>Supplementary Table 12. Additional candidate cancer genes.....</b>                                                                                                                    | <b>71</b>       |
| <b>APPENDIX A. Reporting Summary .....</b>                                                                                                                                               | <b>72</b>       |

**Supplementary Figure 1. Gating strategy for (a) T cell flow cytometry analysis and (b) HSPC index sorting**

CMP, common myeloid progenitor; Lin, Lineage; MEP, megakaryocyte-erythroid progenitor; GMP, granulocyte macrophage progenitor; HSC, hematopoietic stem cell; MPP, multi-potent progenitor; LMPP, lymphoid-primed multi-potent progenitor.

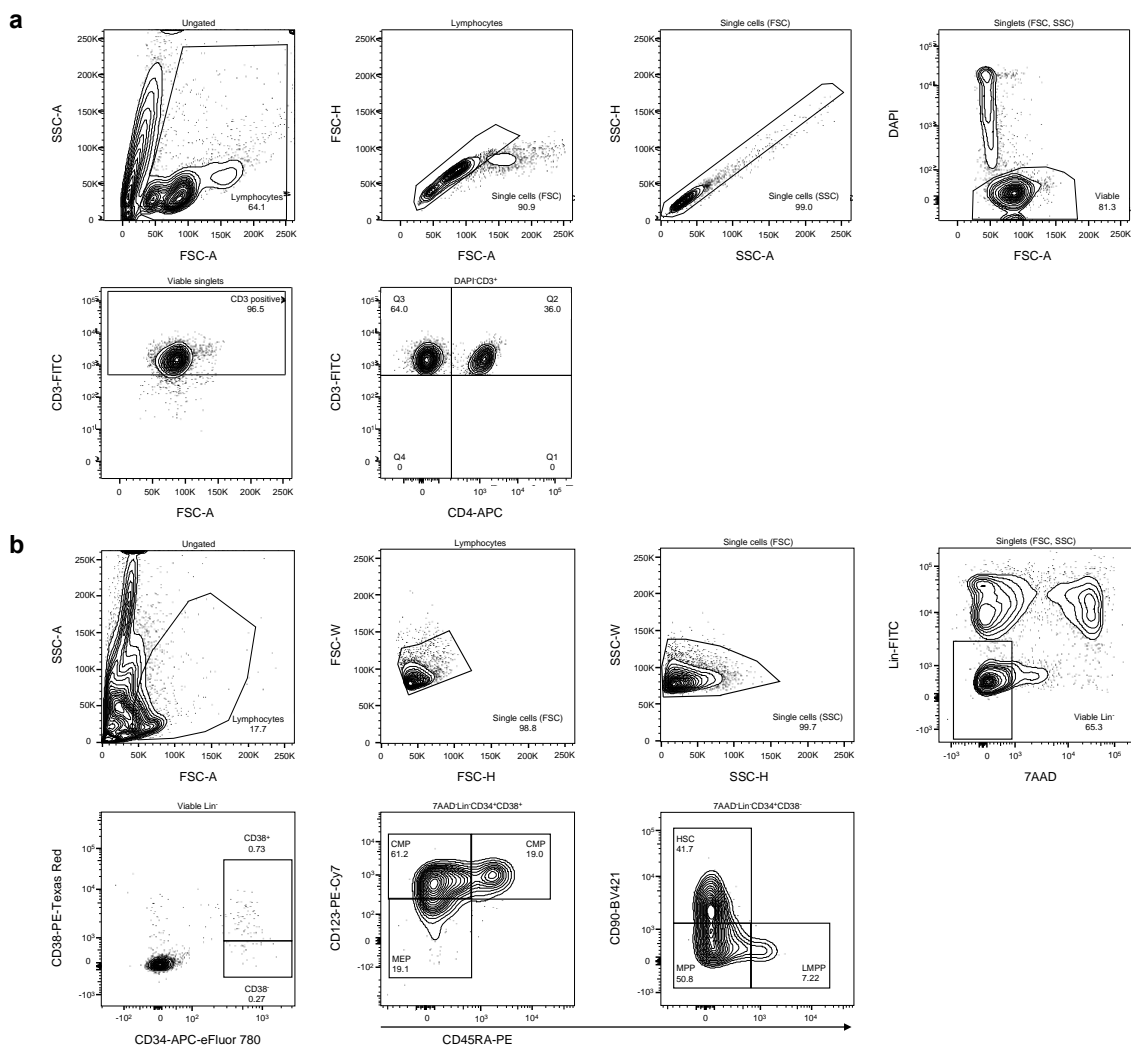

**Supplementary Table 1. Catalogue of somatic substitutions and indels in twin A and twin B**

| Individual | Chr | Pos       | Ref | Alt | Mutation_type | Annotation                | Gene              | Existing_variation |
|------------|-----|-----------|-----|-----|---------------|---------------------------|-------------------|--------------------|
| Twin_A     | 1   | 7048875   | C   | T   | Substitution  | intron_variant            | <i>CAMTA1</i>     | rs190299624        |
| Twin_A     | 1   | 7276191   | T   | TA  | Insertion     | intron_variant            | <i>CAMTA1</i>     | rs34532883         |
| Twin_A     | 1   | 7932734   | TAC | T   | Deletion      | intron_variant            | <i>TNFRSF9</i>    | rs3841802          |
| Twin_A     | 1   | 17778871  | G   | A   | Substitution  | intron_variant            | <i>ACTL8</i>      | -                  |
| Twin_A     | 1   | 19011134  | G   | A   | Substitution  | regulatory_region_variant | -                 | -                  |
| Twin_A     | 1   | 24201443  | G   | A   | Substitution  | intron_variant            | <i>LINC02800</i>  | -                  |
| Twin_A     | 1   | 25634524  | A   | G   | Substitution  | intron_variant            | <i>MAN1C1</i>     | -                  |
| Twin_A     | 1   | 26355029  | G   | A   | Substitution  | upstream_gene_variant     | <i>CRYBG2</i>     | -                  |
| Twin_A     | 1   | 32905284  | G   | GT  | Insertion     | upstream_gene_variant     | <i>TMEM54</i>     | rs201477428        |
| Twin_A     | 1   | 36908778  | GGT | G   | Deletion      | intron_variant            | <i>GRIK3</i>      | rs56228690         |
| Twin_A     | 1   | 53327841  | CA  | C   | Deletion      | frameshift_variant        | <i>LRP8</i>       | rs761955852        |
| Twin_A     | 1   | 54128162  | C   | CT  | Insertion     | downstream_gene_variant   | <i>CDCP2</i>      | rs35156752         |
| Twin_A     | 1   | 58795504  | G   | GA  | Insertion     | intron_variant            | <i>LINC01135</i>  | rs773735239        |
| Twin_A     | 1   | 58846527  | T   | C   | Substitution  | intron_variant            | <i>LINC01135</i>  | rs1310251048       |
| Twin_A     | 1   | 62922910  | C   | A   | Substitution  | intergenic_variant        | -                 | -                  |
| Twin_A     | 1   | 81244570  | C   | T   | Substitution  | intergenic_variant        | -                 | -                  |
| Twin_A     | 1   | 82141981  | T   | TA  | Insertion     | intergenic_variant        | -                 | rs1036875026       |
| Twin_A     | 1   | 91064439  | G   | T   | Substitution  | intergenic_variant        | -                 | rs556744289        |
| Twin_A     | 1   | 91598893  | G   | A   | Substitution  | upstream_gene_variant     | <i>AL714022.1</i> | -                  |
| Twin_A     | 1   | 93828702  | C   | CT  | Insertion     | intron_variant            | <i>BCAR3</i>      | rs969811086        |
| Twin_A     | 1   | 106288464 | G   | T   | Substitution  | intergenic_variant        | -                 | rs183684643        |
| Twin_A     | 1   | 111854251 | A   | G   | Substitution  | intron_variant            | <i>KCND3</i>      | -                  |
| Twin_A     | 1   | 112723366 | C   | A   | Substitution  | intron_variant            | <i>TAFA3</i>      | -                  |
| Twin_A     | 1   | 117227167 | C   | T   | Substitution  | intergenic_variant        | -                 | rs1249405708       |
| Twin_A     | 1   | 122502993 | T   | A   | Substitution  | intergenic_variant        | -                 | rs1271741426       |
| Twin_A     | 1   | 123009960 | C   | A   | Substitution  | intergenic_variant        | -                 | rs1355262045       |
| Twin_A     | 1   | 144518342 | G   | A   | Substitution  | intergenic_variant        | -                 | rs1289463903       |
| Twin_A     | 1   | 152011365 | A   | G   | Substitution  | intron_variant            | <i>AL450992.1</i> | -                  |
| Twin_A     | 1   | 152568644 | A   | G   | Substitution  | upstream_gene_variant     | <i>LCE3E</i>      | -                  |
| Twin_A     | 1   | 155136742 | C   | CA  | Insertion     | intron_variant            | <i>SLC50A1</i>    | rs879631277        |
| Twin_A     | 1   | 155442289 | T   | TA  | Insertion     | intron_variant            | <i>ASHIL</i>      | rs1016155747       |
| Twin_A     | 1   | 155643901 | C   | T   | Substitution  | intron_variant            | <i>AL353807.3</i> | -                  |
| Twin_A     | 1   | 164325871 | G   | A   | Substitution  | intergenic_variant        | -                 | -                  |
| Twin_A     | 1   | 167888410 | A   | AT  | Insertion     | intron_variant            | <i>ADCY10</i>     | rs930197268        |
| Twin_A     | 1   | 172874706 | T   | C   | Substitution  | intron_variant            | <i>AL031599.1</i> | -                  |
| Twin_A     | 1   | 173897024 | T   | A   | Substitution  | 3_prime_UTR_variant       | <i>ZBTB37</i>     | rs1000471968       |
| Twin_A     | 1   | 178136491 | C   | T   | Substitution  | intron_variant            | <i>RASAL2</i>     | -                  |

|        |   |           |       |       |              |                           |                   |              |
|--------|---|-----------|-------|-------|--------------|---------------------------|-------------------|--------------|
| Twin_A | 1 | 182688357 | GCT   | G     | Deletion     | upstream_gene_variant     | <i>RGS8</i>       | rs57313959   |
| Twin_A | 1 | 182732230 | TTC   | T     | Deletion     | upstream_gene_variant     | <i>AL353778.1</i> | rs1191757083 |
| Twin_A | 1 | 185587702 | C     | A     | Substitution | intron_variant            | <i>LINC01350</i>  | -            |
| Twin_A | 1 | 185717034 | C     | T     | Substitution | regulatory_region_variant | -                 | rs74766303   |
| Twin_A | 1 | 188790583 | C     | T     | Substitution | intergenic_variant        | -                 | -            |
| Twin_A | 1 | 190678569 | TGTTG | T     | Deletion     | intron_variant            | <i>LINC01720</i>  | -            |
| Twin_A | 1 | 191116119 | T     | TTA   | Insertion    | intron_variant            | <i>AL138927.1</i> | rs386354456  |
| Twin_A | 1 | 191963370 | T     | TC    | Insertion    | intron_variant            | <i>LINC02770</i>  | -            |
| Twin_A | 1 | 196771008 | G     | T     | Substitution | upstream_gene_variant     | <i>CFHR3</i>      | -            |
| Twin_A | 1 | 199078846 | G     | GA    | Insertion    | downstream_gene_variant   | <i>LINC01221</i>  | rs914403440  |
| Twin_A | 1 | 213790163 | G     | T     | Substitution | intron_variant            | <i>AC096639.1</i> | -            |
| Twin_A | 1 | 218758531 | G     | A     | Substitution | intergenic_variant        | -                 | -            |
| Twin_A | 1 | 237523679 | G     | A     | Substitution | intron_variant            | <i>RYR2</i>       | rs1165384474 |
| Twin_A | 1 | 238480115 | T     | C     | Substitution | downstream_gene_variant   | <i>LINC01139</i>  | rs1384492382 |
| Twin_A | 1 | 240415525 | T     | TATA  | Insertion    | intron_variant            | <i>FMN2</i>       | rs202218606  |
| Twin_A | 1 | 243567256 | GC    | G     | Deletion     | intron_variant            | <i>AKT3</i>       | -            |
| Twin_A | 2 | 184966    | A     | T     | Substitution | intergenic_variant        | -                 | -            |
| Twin_A | 2 | 2982012   | G     | A     | Substitution | intron_variant            | <i>LINC01250</i>  | rs1038718094 |
| Twin_A | 2 | 5026216   | TA    | T     | Deletion     | intergenic_variant        | -                 | rs1002511716 |
| Twin_A | 2 | 11568288  | G     | A     | Substitution | intron_variant            | <i>GREB1</i>      | rs1225502656 |
| Twin_A | 2 | 12436887  | T     | G     | Substitution | intron_variant            | <i>MIR3681HG</i>  | -            |
| Twin_A | 2 | 13111603  | C     | A     | Substitution | intron_variant            | <i>AC093912.1</i> | -            |
| Twin_A | 2 | 17632861  | A     | C     | Substitution | intron_variant            | <i>VSNLI</i>      | -            |
| Twin_A | 2 | 19486986  | C     | CT    | Insertion    | intron_variant            | <i>LINC01808</i>  | rs796988189  |
| Twin_A | 2 | 24266260  | C     | T     | Substitution | intron_variant            | <i>ITSN2</i>      | -            |
| Twin_A | 2 | 25819904  | C     | CTTAT | Insertion    | intron_variant            | <i>ASXL2</i>      | rs879625913  |
| Twin_A | 2 | 29907671  | C     | G     | Substitution | downstream_gene_variant   | <i>AC106870.1</i> | rs1275974026 |
| Twin_A | 2 | 31671794  | C     | T     | Substitution | intergenic_variant        | -                 | rs936962348  |
| Twin_A | 2 | 32351096  | CT    | C     | Deletion     | intergenic_variant        | -                 | rs747843331  |
| Twin_A | 2 | 35209815  | A     | G     | Substitution | intergenic_variant        | -                 | -            |
| Twin_A | 2 | 38570879  | C     | CA    | Insertion    | intron_variant            | <i>HNRNPLL</i>    | rs796515789  |
| Twin_A | 2 | 49012790  | C     | T     | Substitution | intron_variant            | <i>FSHR</i>       | rs1051686975 |
| Twin_A | 2 | 54291307  | G     | A     | Substitution | intron_variant            | <i>ACYP2</i>      | -            |
| Twin_A | 2 | 62581105  | A     | G     | Substitution | intron_variant            | <i>AC092155.1</i> | rs1357993052 |
| Twin_A | 2 | 64592352  | T     | TA    | Insertion    | 3_prime_UTR_variant       | <i>AFTPH</i>      | rs879897290  |
| Twin_A | 2 | 66088937  | C     | T     | Substitution | downstream_gene_variant   | <i>AC007389.1</i> | -            |
| Twin_A | 2 | 78204244  | C     | A     | Substitution | intron_variant            | <i>AC012494.1</i> | -            |
| Twin_A | 2 | 78265814  | T     | C     | Substitution | intron_variant            | <i>AC012494.1</i> | -            |
| Twin_A | 2 | 79075253  | T     | TA    | Insertion    | intergenic_variant        | -                 | rs200270320  |
| Twin_A | 2 | 83704515  | C     | T     | Substitution | intergenic_variant        | -                 | -            |
| Twin_A | 2 | 86143605  | A     | AT    | Insertion    | downstream_gene_variant   | <i>PTCD3</i>      | rs952364218  |
| Twin_A | 2 | 86786422  | C     | T     | Substitution | intron_variant            | <i>CD8A</i>       | -            |

|        |   |           |       |     |              |                                    |                   |              |
|--------|---|-----------|-------|-----|--------------|------------------------------------|-------------------|--------------|
| Twin_A | 2 | 87046122  | A     | C   | Substitution | intron_variant                     | <i>ANAPC1P2</i>   | rs79742084   |
| Twin_A | 2 | 89100821  | C     | G   | Substitution | upstream_gene_variant              | <i>IGKV1</i>      | -            |
| Twin_A | 2 | 90026936  | G     | A   | Substitution | downstream_gene_variant            | <i>IGKV6D</i>     | rs568946974  |
| Twin_A | 2 | 93865725  | G     | C   | Substitution | intergenic_variant                 | -                 | -            |
| Twin_A | 2 | 98022727  | T     | TTG | Insertion    | regulatory_region_variant          | -                 | rs371216469  |
| Twin_A | 2 | 105464070 | C     | CA  | Insertion    | intergenic_variant                 | -                 | rs1161295349 |
| Twin_A | 2 | 107747999 | TAC   | T   | Deletion     | intron_variant                     | <i>LINC01885</i>  | rs146173650  |
| Twin_A | 2 | 113030007 | C     | T   | Substitution | intron_variant                     | <i>IL36B</i>      | rs771673800  |
| Twin_A | 2 | 115188061 | AAG   | A   | Deletion     | intron_variant                     | <i>DPP10</i>      | rs59672278   |
| Twin_A | 2 | 118358987 | C     | T   | Substitution | intergenic_variant                 | -                 | -            |
| Twin_A | 2 | 119522301 | G     | GA  | Insertion    | intron_variant                     | <i>SCTR</i>       | rs797004076  |
| Twin_A | 2 | 122548088 | A     | G   | Substitution | intron_variant                     | <i>AC011246.1</i> | rs893268258  |
| Twin_A | 2 | 124139117 | G     | GT  | Insertion    | downstream_gene_variant            | <i>CNTNAP5</i>    | rs1052761072 |
| Twin_A | 2 | 126462653 | G     | A   | Substitution | intergenic_variant                 | -                 | rs147150064  |
| Twin_A | 2 | 126802154 | C     | T   | Substitution | regulatory_region_variant          | -                 | rs1390212792 |
| Twin_A | 2 | 130631605 | G     | T   | Substitution | intron_variant                     | <i>POTEJ</i>      | -            |
| Twin_A | 2 | 135703624 | G     | GT  | Insertion    | intron_variant                     | <i>R3HDM1</i>     | rs1194873094 |
| Twin_A | 2 | 139236448 | C     | A   | Substitution | intergenic_variant                 | -                 | -            |
| Twin_A | 2 | 140606025 | AAG   | A   | Deletion     | intron_variant                     | <i>LRP1B</i>      | rs541895855  |
| Twin_A | 2 | 142582383 | T     | C   | Substitution | regulatory_region_variant          | -                 | -            |
| Twin_A | 2 | 145569408 | G     | A   | Substitution | non_coding_transcript_exon_variant | <i>AC092484.1</i> | -            |
| Twin_A | 2 | 145603291 | G     | A   | Substitution | non_coding_transcript_exon_variant | <i>AC079163.1</i> | rs373802799  |
| Twin_A | 2 | 148242718 | A     | T   | Substitution | intron_variant                     | <i>MBD5</i>       | -            |
| Twin_A | 2 | 153181357 | C     | CA  | Insertion    | intron_variant                     | <i>AC011901.1</i> | rs34588886   |
| Twin_A | 2 | 153730111 | G     | GA  | Insertion    | intergenic_variant                 | -                 | rs929649211  |
| Twin_A | 2 | 154639539 | G     | A   | Substitution | intergenic_variant                 | -                 | -            |
| Twin_A | 2 | 162949464 | C     | G   | Substitution | intergenic_variant                 | -                 | -            |
| Twin_A | 2 | 163100502 | C     | A   | Substitution | intergenic_variant                 | -                 | -            |
| Twin_A | 2 | 167809460 | T     | G   | Substitution | intergenic_variant                 | -                 | -            |
| Twin_A | 2 | 174496556 | C     | A   | Substitution | intergenic_variant                 | -                 | -            |
| Twin_A | 2 | 175727129 | G     | T   | Substitution | intergenic_variant                 | -                 | rs182157918  |
| Twin_A | 2 | 181542157 | CAGTG | C   | Deletion     | intron_variant                     | <i>CERKL</i>      | -            |
| Twin_A | 2 | 183736872 | T     | C   | Substitution | intergenic_variant                 | -                 | -            |
| Twin_A | 2 | 193562677 | CGT   | C   | Deletion     | intergenic_variant                 | -                 | rs59053823   |
| Twin_A | 2 | 194108461 | C     | CT  | Insertion    | intergenic_variant                 | -                 | rs879718049  |
| Twin_A | 2 | 196497946 | T     | C   | Substitution | intron_variant                     | <i>HECW2</i>      | -            |
| Twin_A | 2 | 199505098 | A     | G   | Substitution | intergenic_variant                 | -                 | -            |
| Twin_A | 2 | 199984230 | A     | G   | Substitution | intron_variant                     | <i>MAIP1</i>      | -            |
| Twin_A | 2 | 200975338 | A     | T   | Substitution | downstream_gene_variant            | <i>FAM126B</i>    | -            |
| Twin_A | 2 | 202920157 | C     | CT  | Insertion    | intron_variant                     | <i>CARF</i>       | rs969806621  |
| Twin_A | 2 | 217649629 | G     | C   | Substitution | intron_variant                     | <i>DIRC3</i>      | -            |
| Twin_A | 2 | 218749467 | C     | CT  | Insertion    | intron_variant                     | <i>TTLA</i>       | rs368058156  |

|        |   |           |      |    |              |                           |                   |              |
|--------|---|-----------|------|----|--------------|---------------------------|-------------------|--------------|
| Twin_A | 2 | 221924308 | A    | G  | Substitution | intergenic_variant        | -                 | -            |
| Twin_A | 2 | 227692889 | T    | C  | Substitution | intron_variant            | <i>SLC19A3</i>    | -            |
| Twin_A | 2 | 228021121 | C    | T  | Substitution | intron_variant            | <i>SPHKAP</i>     | rs531054237  |
| Twin_A | 2 | 234919271 | G    | GT | Insertion    | intergenic_variant        | -                 | rs893811865  |
| Twin_A | 2 | 235048421 | C    | A  | Substitution | intron_variant            | <i>SH3BP4</i>     | -            |
| Twin_A | 2 | 235142193 | T    | C  | Substitution | downstream_gene_variant   | <i>CEP19P1</i>    | rs953123210  |
| Twin_A | 2 | 236024598 | A    | G  | Substitution | intron_variant            | <i>AGAP1</i>      | -            |
| Twin_A | 2 | 236165626 | A    | C  | Substitution | 3_prime_UTR_variant       | <i>GBX2</i>       | -            |
| Twin_A | 2 | 240285993 | G    | A  | Substitution | upstream_gene_variant     | <i>U3</i>         | rs79159698   |
| Twin_A | 2 | 240487775 | C    | T  | Substitution | intron_variant            | <i>ANKMY1</i>     | -            |
| Twin_A | 3 | 1259968   | A    | G  | Substitution | intron_variant            | <i>CNTN6</i>      | -            |
| Twin_A | 3 | 6904723   | G    | GT | Insertion    | intron_variant            | <i>GRM7</i>       | rs143641576  |
| Twin_A | 3 | 9646697   | T    | A  | Substitution | upstream_gene_variant     | <i>MTMR14</i>     | rs1001727401 |
| Twin_A | 3 | 26440532  | A    | T  | Substitution | intergenic_variant        | -                 | -            |
| Twin_A | 3 | 29763656  | A    | C  | Substitution | intron_variant            | <i>RBMS3</i>      | -            |
| Twin_A | 3 | 32019778  | T    | C  | Substitution | intron_variant            | <i>OSBPL10</i>    | rs545152631  |
| Twin_A | 3 | 32526653  | CCA  | C  | Deletion     | 3_prime_UTR_variant       | <i>DYNC1LI1</i>   | rs3836420    |
| Twin_A | 3 | 40432373  | TGA  | T  | Deletion     | downstream_gene_variant   | <i>ENTPD3</i>     | rs142976010  |
| Twin_A | 3 | 42455599  | G    | T  | Substitution | intergenic_variant        | -                 | -            |
| Twin_A | 3 | 59893891  | T    | C  | Substitution | intron_variant            | <i>FHIT</i>       | -            |
| Twin_A | 3 | 65074311  | C    | T  | Substitution | intergenic_variant        | -                 | -            |
| Twin_A | 3 | 71644657  | A    | T  | Substitution | intron_variant            | <i>AC097634.4</i> | rs11925350   |
| Twin_A | 3 | 72405852  | G    | A  | Substitution | intron_variant            | <i>RYBP</i>       | -            |
| Twin_A | 3 | 74296285  | G    | A  | Substitution | intron_variant            | <i>CNTN3</i>      | rs74970959   |
| Twin_A | 3 | 74299076  | G    | A  | Substitution | intron_variant            | <i>CNTN3</i>      | rs149006907  |
| Twin_A | 3 | 74980380  | T    | A  | Substitution | regulatory_region_variant | -                 | -            |
| Twin_A | 3 | 75692610  | CTTA | C  | Deletion     | intron_variant            | <i>ZNF717</i>     | rs140744949  |
| Twin_A | 3 | 76086971  | T    | C  | Substitution | intron_variant            | <i>ROBO2</i>      | -            |
| Twin_A | 3 | 80858231  | C    | T  | Substitution | intergenic_variant        | -                 | rs982669611  |
| Twin_A | 3 | 86921756  | A    | G  | Substitution | intron_variant            | <i>VGLL3</i>      | -            |
| Twin_A | 3 | 90430217  | C    | G  | Substitution | intergenic_variant        | -                 | -            |
| Twin_A | 3 | 90965981  | A    | G  | Substitution | intergenic_variant        | -                 | rs1304555355 |
| Twin_A | 3 | 95430870  | C    | T  | Substitution | intergenic_variant        | -                 | rs562186321  |
| Twin_A | 3 | 103475498 | G    | A  | Substitution | intergenic_variant        | -                 | -            |
| Twin_A | 3 | 107699193 | C    | T  | Substitution | intron_variant            | <i>BBX</i>        | -            |
| Twin_A | 3 | 117666302 | C    | CT | Insertion    | intergenic_variant        | -                 | rs560342962  |
| Twin_A | 3 | 118298534 | T    | C  | Substitution | intron_variant            | <i>AC068633.1</i> | -            |
| Twin_A | 3 | 124027883 | G    | A  | Substitution | intergenic_variant        | -                 | -            |
| Twin_A | 3 | 125726439 | G    | A  | Substitution | downstream_gene_variant   | <i>OR7E93P</i>    | rs147522636  |
| Twin_A | 3 | 126102405 | G    | A  | Substitution | downstream_gene_variant   | <i>ALDH1L1</i>    | rs1348872806 |
| Twin_A | 3 | 147257030 | A    | G  | Substitution | intron_variant            | <i>AC092957.1</i> | -            |
| Twin_A | 3 | 148087688 | G    | GT | Insertion    | intron_variant            | <i>LINC02032</i>  | rs35840438   |

|        |   |           |                                                                 |    |              |                                    |                   |              |
|--------|---|-----------|-----------------------------------------------------------------|----|--------------|------------------------------------|-------------------|--------------|
| Twin_A | 3 | 152974761 | T                                                               | C  | Substitution | intergenic_variant                 | -                 | rs137865769  |
| Twin_A | 3 | 153068733 | G                                                               | A  | Substitution | downstream_gene_variant            | <i>HMG2P13</i>    | -            |
| Twin_A | 3 | 153706759 | T                                                               | G  | Substitution | intron_variant                     | <i>LINC02006</i>  | -            |
| Twin_A | 3 | 156297775 | C                                                               | T  | Substitution | intron_variant                     | <i>KCNAB1</i>     | rs370869760  |
| Twin_A | 3 | 160115640 | G                                                               | A  | Substitution | intron_variant                     | <i>IL12A-AS1</i>  | rs985125306  |
| Twin_A | 3 | 165572607 | C                                                               | T  | Substitution | intron_variant                     | <i>LINC01322</i>  | -            |
| Twin_A | 3 | 168769424 | G                                                               | A  | Substitution | intron_variant                     | <i>EGFEM1P</i>    | rs536413401  |
| Twin_A | 3 | 168769557 | T                                                               | C  | Substitution | intron_variant                     | <i>EGFEM1P</i>    | rs575522209  |
| Twin_A | 3 | 183534087 | TTACTTT<br>AAAGTAC<br>TTTAAA<br>GTACTTTA<br>CTTTAAA<br>GTACTTGT | T  | Deletion     | intron_variant                     | <i>KLHL6</i>      | rs1193720974 |
| Twin_A | 3 | 187366417 | G                                                               | A  | Substitution | upstream_gene_variant              | <i>RTP4</i>       | -            |
| Twin_A | 4 | 3011910   | G                                                               | A  | Substitution | intron_variant                     | <i>GRK4</i>       | rs1056281673 |
| Twin_A | 4 | 5718308   | T                                                               | A  | Substitution | intron_variant                     | <i>EVC</i>        | -            |
| Twin_A | 4 | 15955763  | G                                                               | C  | Substitution | downstream_gene_variant            | <i>FGFBP2</i>     | -            |
| Twin_A | 4 | 17001308  | C                                                               | T  | Substitution | intron_variant                     | <i>AC106894.1</i> | rs1437750527 |
| Twin_A | 4 | 17415320  | G                                                               | A  | Substitution | intergenic_variant                 | -                 | -            |
| Twin_A | 4 | 22103283  | A                                                               | G  | Substitution | intron_variant                     | <i>AC096719.1</i> | -            |
| Twin_A | 4 | 26343555  | G                                                               | GT | Insertion    | intron_variant                     | <i>RBP1</i>       | rs150586776  |
| Twin_A | 4 | 26935882  | A                                                               | G  | Substitution | intron_variant                     | <i>STIM2</i>      | rs1392350220 |
| Twin_A | 4 | 31169536  | C                                                               | A  | Substitution | upstream_gene_variant              | <i>LINC02497</i>  | -            |
| Twin_A | 4 | 35852584  | CAG                                                             | C  | Deletion     | intergenic_variant                 | -                 | rs150417183  |
| Twin_A | 4 | 38452605  | G                                                               | A  | Substitution | non_coding_transcript_exon_variant | <i>LINC01258</i>  | rs527412993  |
| Twin_A | 4 | 44413264  | T                                                               | G  | Substitution | intron_variant                     | <i>KCTD8</i>      | -            |
| Twin_A | 4 | 52545084  | CCTCT                                                           | C  | Deletion     | intron_variant                     | <i>AC097522.2</i> | rs748919064  |
| Twin_A | 4 | 54682436  | C                                                               | CT | Insertion    | intron_variant                     | <i>KIT</i>        | rs368264394  |
| Twin_A | 4 | 55961258  | A                                                               | G  | Substitution | intron_variant                     | <i>CEP135</i>     | -            |
| Twin_A | 4 | 61895466  | AAAT                                                            | A  | Deletion     | upstream_gene_variant              | <i>ADGRL3</i>     | rs10603633   |
| Twin_A | 4 | 63566747  | C                                                               | T  | Substitution | intergenic_variant                 | -                 | -            |
| Twin_A | 4 | 66771456  | G                                                               | C  | Substitution | intergenic_variant                 | -                 | -            |
| Twin_A | 4 | 69630424  | C                                                               | T  | Substitution | intron_variant                     | <i>UGT2A1</i>     | -            |
| Twin_A | 4 | 74248292  | T                                                               | C  | Substitution | intron_variant                     | <i>MTHFD2L</i>    | -            |
| Twin_A | 4 | 74655308  | C                                                               | T  | Substitution | regulatory_region_variant          | -                 | rs781899546  |
| Twin_A | 4 | 74668604  | C                                                               | CT | Insertion    | regulatory_region_variant          | -                 | rs1418001328 |
| Twin_A | 4 | 76432023  | G                                                               | T  | Substitution | upstream_gene_variant              | <i>SHROOM3</i>    | -            |
| Twin_A | 4 | 82531664  | A                                                               | G  | Substitution | intron_variant                     | <i>TMEM150C</i>   | -            |
| Twin_A | 4 | 105234449 | TA                                                              | T  | Deletion     | frameshift_variant                 | <i>TET2</i>       | -            |
| Twin_A | 4 | 106394908 | AAT                                                             | A  | Deletion     | intergenic_variant                 | -                 | rs140334876  |
| Twin_A | 4 | 109876682 | A                                                               | G  | Substitution | downstream_gene_variant            | <i>LRIT3</i>      | -            |
| Twin_A | 4 | 110522189 | C                                                               | CT | Insertion    | intron_variant                     | <i>ENPEP</i>      | rs539673220  |
| Twin_A | 4 | 111359412 | C                                                               | T  | Substitution | intergenic_variant                 | -                 | -            |
| Twin_A | 4 | 113822564 | A                                                               | AT | Insertion    | regulatory_region_variant          | -                 | rs34730469   |



|        |   |            |     |    |              |                           |                   |              |
|--------|---|------------|-----|----|--------------|---------------------------|-------------------|--------------|
| Twin_A | 4 | 115289705  | A   | T  | Substitution | intergenic_variant        | -                 | rs201585293  |
| Twin_A | 4 | 119833655  | A   | T  | Substitution | intergenic_variant        | -                 | -            |
| Twin_A | 4 | 122600220  | C   | T  | Substitution | intergenic_variant        | -                 | -            |
| Twin_A | 4 | 124416683  | A   | AT | Insertion    | intergenic_variant        | -                 | rs112541914  |
| Twin_A | 4 | 134850961  | G   | A  | Substitution | intergenic_variant        | -                 | -            |
| Twin_A | 4 | 145648023  | AT  | A  | Deletion     | upstream_gene_variant     | <i>MMAA</i>       | rs771723312  |
| Twin_A | 4 | 160621868  | A   | G  | Substitution | intergenic_variant        | -                 | -            |
| Twin_A | 4 | 161252551  | T   | C  | Substitution | regulatory_region_variant | -                 | -            |
| Twin_A | 4 | 161288198  | G   | GA | Insertion    | intergenic_variant        | -                 | rs969053461  |
| Twin_A | 4 | 162816440  | T   | C  | Substitution | intron_variant            | <i>AC021134.1</i> | -            |
| Twin_A | 4 | 180265089  | G   | A  | Substitution | intergenic_variant        | -                 | -            |
| Twin_A | 4 | 180667100  | G   | A  | Substitution | regulatory_region_variant | -                 | rs563546983  |
| Twin_A | 4 | 182387149  | G   | A  | Substitution | intron_variant            | <i>TENM3</i>      | rs983423020  |
| Twin_A | 4 | 183453115  | T   | C  | Substitution | downstream_gene_variant   | <i>CDKN2AIP</i>   | -            |
| Twin_A | 4 | 185461063  | T   | C  | Substitution | missense_variant          | <i>CCDC110</i>    | rs773624975  |
| Twin_A | 4 | 186034311  | C   | T  | Substitution | intergenic_variant        | -                 | rs199807699  |
| Twin_A | 4 | 187661068  | G   | T  | Substitution | downstream_gene_variant   | <i>AC097521.1</i> | -            |
| Twin_A | 4 | 188628950  | T   | TA | Insertion    | intron_variant            | <i>LINC01060</i>  | -            |
| Twin_A | 4 | 105259633* | G   | A  | Substitution | missense_variant          | <i>TET2</i>       | rs1456238164 |
| Twin_A | 5 | 2114089    | AT  | A  | Deletion     | intron_variant            | <i>AC124852.1</i> | rs374364105  |
| Twin_A | 5 | 4579966    | C   | T  | Substitution | intron_variant            | <i>AC106799.2</i> | -            |
| Twin_A | 5 | 6643035    | G   | GT | Insertion    | intron_variant            | <i>SRD5A1</i>     | rs35377021   |
| Twin_A | 5 | 7817145    | G   | GA | Insertion    | intron_variant            | <i>ADCY2</i>      | rs57771304   |
| Twin_A | 5 | 7987372    | C   | T  | Substitution | intergenic_variant        | -                 | rs1320304875 |
| Twin_A | 5 | 10921181   | G   | GT | Insertion    | intergenic_variant        | -                 | rs60156777   |
| Twin_A | 5 | 10937820   | A   | G  | Substitution | intergenic_variant        | -                 | rs561589454  |
| Twin_A | 5 | 12387040   | G   | A  | Substitution | intergenic_variant        | -                 | -            |
| Twin_A | 5 | 18474168   | C   | T  | Substitution | intergenic_variant        | -                 | -            |
| Twin_A | 5 | 24399357   | G   | A  | Substitution | intergenic_variant        | -                 | rs868374455  |
| Twin_A | 5 | 33779372   | G   | A  | Substitution | intron_variant            | <i>ADAMTS12</i>   | -            |
| Twin_A | 5 | 35831884   | C   | T  | Substitution | upstream_gene_variant     | <i>AC137810.1</i> | -            |
| Twin_A | 5 | 36636178   | G   | T  | Substitution | intron_variant            | <i>SLCIA3</i>     | -            |
| Twin_A | 5 | 41753270   | TAC | T  | Deletion     | intron_variant            | <i>OXCT1</i>      | rs36095905   |
| Twin_A | 5 | 52121218   | T   | G  | Substitution | intergenic_variant        | -                 | rs111904173  |
| Twin_A | 5 | 56387833   | C   | T  | Substitution | intergenic_variant        | -                 | -            |
| Twin_A | 5 | 58833324   | TCA | T  | Deletion     | intron_variant            | <i>RAB3C</i>      | rs571940681  |
| Twin_A | 5 | 58833331   | C   | T  | Substitution | intron_variant            | <i>RAB3C</i>      | rs199895867  |
| Twin_A | 5 | 63548792   | G   | C  | Substitution | intergenic_variant        | -                 | -            |
| Twin_A | 5 | 69055388   | A   | T  | Substitution | intergenic_variant        | -                 | -            |
| Twin_A | 5 | 73740730   | C   | T  | Substitution | intron_variant            | <i>ARHGEF28</i>   | rs934596518  |
| Twin_A | 5 | 75285945   | G   | T  | Substitution | intergenic_variant        | -                 | -            |
| Twin_A | 5 | 78363812   | A   | AT | Insertion    | upstream_gene_variant     | <i>SCAMP1</i>     | rs566623870  |

|        |   |           |       |     |              |                           |                   |              |
|--------|---|-----------|-------|-----|--------------|---------------------------|-------------------|--------------|
| Twin_A | 5 | 79269736  | A     | AT  | Insertion    | intron_variant            | <i>JMY</i>        | rs905517032  |
| Twin_A | 5 | 80583714  | T     | TGC | Insertion    | intergenic_variant        | -                 | rs113455475  |
| Twin_A | 5 | 81377269  | G     | A   | Substitution | intron_variant            | <i>ACOT12</i>     | -            |
| Twin_A | 5 | 82451636  | A     | G   | Substitution | intergenic_variant        | -                 | -            |
| Twin_A | 5 | 85688616  | C     | T   | Substitution | intergenic_variant        | -                 | -            |
| Twin_A | 5 | 86606508  | G     | GT  | Insertion    | intergenic_variant        | -                 | rs1353717748 |
| Twin_A | 5 | 91742536  | G     | C   | Substitution | intron_variant            | <i>AC093298.2</i> | -            |
| Twin_A | 5 | 93374643  | C     | T   | Substitution | intron_variant            | <i>NR2F1</i>      | rs529601636  |
| Twin_A | 5 | 95231337  | GAT   | G   | Deletion     | intron_variant            | <i>MCTP1</i>      | rs138755290  |
| Twin_A | 5 | 95701747  | A     | G   | Substitution | upstream_gene_variant     | <i>SPATA9</i>     | -            |
| Twin_A | 5 | 97765568  | G     | A   | Substitution | intergenic_variant        | -                 | -            |
| Twin_A | 5 | 100034257 | G     | A   | Substitution | intergenic_variant        | -                 | -            |
| Twin_A | 5 | 100071988 | T     | A   | Substitution | upstream_gene_variant     | <i>AC092278.1</i> | rs78484001   |
| Twin_A | 5 | 100155088 | G     | GT  | Insertion    | downstream_gene_variant   | <i>RNU6</i>       | rs5869895    |
| Twin_A | 5 | 100295778 | C     | T   | Substitution | intergenic_variant        | -                 | -            |
| Twin_A | 5 | 105654988 | C     | T   | Substitution | intergenic_variant        | -                 | rs1173103088 |
| Twin_A | 5 | 105941453 | T     | G   | Substitution | intergenic_variant        | -                 | -            |
| Twin_A | 5 | 111449354 | A     | G   | Substitution | intron_variant            | <i>CAMK4</i>      | -            |
| Twin_A | 5 | 115666098 | C     | T   | Substitution | regulatory_region_variant | -                 | -            |
| Twin_A | 5 | 116208129 | T     | C   | Substitution | intron_variant            | <i>COMMD10</i>    | -            |
| Twin_A | 5 | 116797618 | T     | TA  | Insertion    | intergenic_variant        | -                 | rs370022009  |
| Twin_A | 5 | 123223704 | C     | A   | Substitution | intergenic_variant        | -                 | -            |
| Twin_A | 5 | 130388901 | G     | A   | Substitution | upstream_gene_variant     | <i>RNU7</i>       | rs1308696583 |
| Twin_A | 5 | 131362688 | C     | T   | Substitution | intron_variant            | <i>CDC42SE2</i>   | -            |
| Twin_A | 5 | 131622186 | T     | TA  | Insertion    | intron_variant            | <i>RAPGEF6</i>    | rs368148920  |
| Twin_A | 5 | 142866780 | T     | G   | Substitution | intron_variant            | <i>ARHGAP26</i>   | -            |
| Twin_A | 5 | 147611565 | T     | C   | Substitution | intron_variant            | <i>JAKMIP2</i>    | -            |
| Twin_A | 5 | 152460283 | G     | A   | Substitution | intron_variant            | <i>AC008571.2</i> | -            |
| Twin_A | 5 | 155157242 | C     | T   | Substitution | intron_variant            | <i>AC010476.2</i> | rs950323196  |
| Twin_A | 5 | 162912266 | C     | A   | Substitution | intron_variant            | <i>AC113414.1</i> | -            |
| Twin_A | 5 | 163087087 | G     | GA  | Insertion    | intron_variant            | <i>AC113414.1</i> | rs979728237  |
| Twin_A | 5 | 166031221 | GTAGA | G   | Deletion     | upstream_gene_variant     | <i>RPL7P20</i>    | -            |
| Twin_A | 6 | 7238595   | C     | CT  | Insertion    | intron_variant            | <i>RREB1</i>      | rs796560101  |
| Twin_A | 6 | 8925748   | C     | T   | Substitution | intron_variant            | <i>HULC</i>       | -            |
| Twin_A | 6 | 9330828   | G     | A   | Substitution | intergenic_variant        | -                 | -            |
| Twin_A | 6 | 15203913  | A     | AT  | Insertion    | intergenic_variant        | -                 | rs1241556169 |
| Twin_A | 6 | 16644979  | C     | T   | Substitution | intron_variant            | <i>ATXN1</i>      | -            |
| Twin_A | 6 | 19952193  | G     | A   | Substitution | intergenic_variant        | -                 | rs779233914  |
| Twin_A | 6 | 31570888  | C     | T   | Substitution | upstream_gene_variant     | <i>LTA</i>        | rs956044849  |
| Twin_A | 6 | 36883002  | G     | T   | Substitution | upstream_gene_variant     | <i>C6orf89</i>    | -            |
| Twin_A | 6 | 40639879  | ACT   | A   | Deletion     | intergenic_variant        | -                 | rs35021402   |
| Twin_A | 6 | 40934220  | G     | A   | Substitution | intergenic_variant        | -                 | -            |

|        |   |           |     |     |              |                           |                   |              |
|--------|---|-----------|-----|-----|--------------|---------------------------|-------------------|--------------|
| Twin_A | 6 | 46776061  | TA  | T   | Deletion     | intergenic_variant        | -                 | -            |
| Twin_A | 6 | 46995372  | G   | GT  | Insertion    | downstream_gene_variant   | <i>ADGRF1</i>     | rs142966227  |
| Twin_A | 6 | 58029106  | G   | A   | Substitution | intron_variant            | <i>ALA45250.1</i> | rs1539609    |
| Twin_A | 6 | 60497665  | T   | C   | Substitution | intron_variant            | <i>AC244258.1</i> | -            |
| Twin_A | 6 | 62533854  | G   | A   | Substitution | intergenic_variant        | -                 | rs1050425018 |
| Twin_A | 6 | 70161977  | C   | A   | Substitution | intron_variant            | <i>COL19A1</i>    | rs754784425  |
| Twin_A | 6 | 71671466  | A   | T   | Substitution | intergenic_variant        | -                 | -            |
| Twin_A | 6 | 80070589  | C   | T   | Substitution | upstream_gene_variant     | <i>AL591135.1</i> | rs113123867  |
| Twin_A | 6 | 90318383  | C   | CT  | Insertion    | upstream_gene_variant     | <i>AL132996.1</i> | rs1230991775 |
| Twin_A | 6 | 93048770  | T   | TA  | Insertion    | regulatory_region_variant | -                 | rs1214397059 |
| Twin_A | 6 | 93696846  | GTC | G   | Deletion     | intergenic_variant        | -                 | rs142217537  |
| Twin_A | 6 | 95778674  | T   | A   | Substitution | intergenic_variant        | -                 | -            |
| Twin_A | 6 | 97233067  | G   | GA  | Insertion    | intron_variant            | <i>MMS22L</i>     | rs573093148  |
| Twin_A | 6 | 103570525 | T   | TTA | Insertion    | intergenic_variant        | -                 | rs533182054  |
| Twin_A | 6 | 111252036 | C   | T   | Substitution | intron_variant            | <i>AL360227.1</i> | -            |
| Twin_A | 6 | 117652832 | G   | A   | Substitution | intergenic_variant        | -                 | -            |
| Twin_A | 6 | 119799146 | C   | CT  | Insertion    | intergenic_variant        | -                 | rs1218766914 |
| Twin_A | 6 | 119917789 | C   | G   | Substitution | intergenic_variant        | -                 | -            |
| Twin_A | 6 | 123368975 | C   | G   | Substitution | intron_variant            | <i>TRDN</i>       | -            |
| Twin_A | 6 | 124380080 | A   | T   | Substitution | intron_variant            | <i>NKAIN2</i>     | -            |
| Twin_A | 6 | 126389883 | T   | C   | Substitution | intron_variant            | <i>AL356534.1</i> | -            |
| Twin_A | 6 | 131059163 | G   | A   | Substitution | intron_variant            | <i>EPB41L2</i>    | -            |
| Twin_A | 6 | 131399570 | C   | G   | Substitution | intergenic_variant        | -                 | -            |
| Twin_A | 6 | 134069108 | C   | T   | Substitution | intergenic_variant        | -                 | rs187112667  |
| Twin_A | 6 | 140986451 | A   | C   | Substitution | intergenic_variant        | -                 | -            |
| Twin_A | 6 | 145547033 | T   | G   | Substitution | intron_variant            | <i>EPM2A</i>      | -            |
| Twin_A | 6 | 159660393 | C   | T   | Substitution | intron_variant            | <i>AL078604.4</i> | rs769079326  |
| Twin_A | 6 | 159881330 | C   | CAT | Insertion    | intergenic_variant        | -                 | rs10672852   |
| Twin_A | 6 | 166093829 | G   | T   | Substitution | upstream_gene_variant     | <i>AL627443.3</i> | -            |
| Twin_A | 6 | 166187121 | G   | GA  | Insertion    | intergenic_variant        | -                 | -            |
| Twin_A | 7 | 4979367   | T   | C   | Substitution | intron_variant            | <i>RNF216P1</i>   | rs868499198  |
| Twin_A | 7 | 5000741   | A   | G   | Substitution | downstream_gene_variant   | <i>RNF216P1</i>   | rs1338617888 |
| Twin_A | 7 | 7056369   | G   | A   | Substitution | intron_variant            | <i>AC079804.3</i> | -            |
| Twin_A | 7 | 9227657   | G   | A   | Substitution | regulatory_region_variant | -                 | rs999966239  |
| Twin_A | 7 | 21817695  | A   | AT  | Insertion    | intron_variant            | <i>DNAH11</i>     | rs201247500  |
| Twin_A | 7 | 30831221  | C   | T   | Substitution | intron_variant            | <i>MINDY4</i>     | -            |
| Twin_A | 7 | 36071829  | A   | G   | Substitution | intergenic_variant        | -                 | rs757946495  |
| Twin_A | 7 | 38945518  | G   | GA  | Insertion    | intergenic_variant        | -                 | rs796386392  |
| Twin_A | 7 | 41732610  | A   | G   | Substitution | intron_variant            | <i>INHBA</i>      | -            |
| Twin_A | 7 | 43378810  | C   | CA  | Insertion    | intron_variant            | <i>HECW1</i>      | rs202007736  |
| Twin_A | 7 | 44090851  | C   | T   | Substitution | intergenic_variant        | -                 | -            |
| Twin_A | 7 | 44510030  | T   | A   | Substitution | downstream_gene_variant   | <i>NPC1L1</i>     | -            |

|        |   |           |       |    |              |                           |                   |              |
|--------|---|-----------|-------|----|--------------|---------------------------|-------------------|--------------|
| Twin_A | 7 | 49269510  | AT    | A  | Deletion     | intergenic_variant        | -                 | rs1265301921 |
| Twin_A | 7 | 49269512  | A     | C  | Substitution | intergenic_variant        | -                 | rs984581632  |
| Twin_A | 7 | 53068163  | G     | A  | Substitution | intergenic_variant        | -                 | rs935736922  |
| Twin_A | 7 | 53091502  | C     | T  | Substitution | intergenic_variant        | -                 | -            |
| Twin_A | 7 | 53364914  | G     | A  | Substitution | upstream_gene_variant     | <i>RNU1</i>       | rs34714639   |
| Twin_A | 7 | 54587046  | C     | A  | Substitution | intergenic_variant        | -                 | -            |
| Twin_A | 7 | 62529040  | C     | T  | Substitution | intergenic_variant        | -                 | rs555323358  |
| Twin_A | 7 | 64713934  | GTATT | G  | Deletion     | downstream_gene_variant   | <i>ZNF107</i>     | rs369110012  |
| Twin_A | 7 | 67857057  | G     | A  | Substitution | intergenic_variant        | -                 | rs1319269938 |
| Twin_A | 7 | 68076463  | CAT   | C  | Deletion     | intergenic_variant        | -                 | rs139100940  |
| Twin_A | 7 | 69630257  | A     | G  | Substitution | intron_variant            | <i>AUTS2</i>      | -            |
| Twin_A | 7 | 73627805  | C     | T  | Substitution | upstream_gene_variant     | <i>MLXIPL</i>     | -            |
| Twin_A | 7 | 81046412  | CT    | C  | Deletion     | intergenic_variant        | -                 | rs1381425510 |
| Twin_A | 7 | 88505688  | G     | A  | Substitution | intron_variant            | <i>AC002069.2</i> | -            |
| Twin_A | 7 | 89031211  | GTA   | G  | Deletion     | intron_variant            | <i>ZNF804B</i>    | -            |
| Twin_A | 7 | 90565456  | G     | GT | Insertion    | intron_variant            | <i>CDK14</i>      | rs373870738  |
| Twin_A | 7 | 95205017  | CCA   | C  | Deletion     | intron_variant            | <i>PPP1R9A</i>    | rs143843788  |
| Twin_A | 7 | 95298520  | G     | C  | Substitution | 3_prime_UTR_variant       | <i>PON1</i>       | -            |
| Twin_A | 7 | 96055652  | T     | TA | Insertion    | intron_variant            | <i>DYNC111</i>    | rs11374590   |
| Twin_A | 7 | 98561959  | C     | A  | Substitution | intergenic_variant        | -                 | -            |
| Twin_A | 7 | 102065090 | G     | GT | Insertion    | intron_variant            | <i>CUX1</i>       | rs562493293  |
| Twin_A | 7 | 109185877 | G     | A  | Substitution | intergenic_variant        | -                 | rs1228545900 |
| Twin_A | 7 | 110615318 | C     | T  | Substitution | intergenic_variant        | -                 | -            |
| Twin_A | 7 | 122016458 | C     | A  | Substitution | intron_variant            | <i>PTPRZ1</i>     | -            |
| Twin_A | 7 | 124142825 | C     | T  | Substitution | intron_variant            | <i>AC006148.1</i> | -            |
| Twin_A | 7 | 128429252 | C     | CT | Insertion    | downstream_gene_variant   | <i>AC010655.1</i> | rs56056515   |
| Twin_A | 7 | 129776973 | A     | G  | Substitution | upstream_gene_variant     | <i>MIR96</i>      | rs1401666012 |
| Twin_A | 7 | 137296579 | A     | G  | Substitution | intron_variant            | <i>PTN</i>        | -            |
| Twin_A | 7 | 139519359 | T     | TA | Insertion    | upstream_gene_variant     | <i>CLEC2L</i>     | rs1220935636 |
| Twin_A | 7 | 149998259 | A     | G  | Substitution | upstream_gene_variant     | <i>AC092681.2</i> | rs2969815    |
| Twin_A | 7 | 153528906 | T     | C  | Substitution | intergenic_variant        | -                 | -            |
| Twin_A | 7 | 154611485 | A     | G  | Substitution | intron_variant            | <i>DPP6</i>       | -            |
| Twin_A | 8 | 503037    | C     | T  | Substitution | intron_variant            | <i>TDRP</i>       | rs1166917437 |
| Twin_A | 8 | 13876611  | G     | GA | Insertion    | regulatory_region_variant | -                 | rs34968549   |
| Twin_A | 8 | 17691704  | G     | GT | Insertion    | intron_variant            | <i>MTUS1</i>      | rs200014137  |
| Twin_A | 8 | 19550828  | C     | T  | Substitution | intron_variant            | <i>CSGALNACT1</i> | -            |
| Twin_A | 8 | 25892225  | T     | C  | Substitution | intron_variant            | <i>EBF2</i>       | -            |
| Twin_A | 8 | 30978684  | T     | C  | Substitution | downstream_gene_variant   | <i>AC008066.1</i> | -            |
| Twin_A | 8 | 36379501  | CAT   | C  | Deletion     | intron_variant            | <i>AC090809.1</i> | rs148082032  |
| Twin_A | 8 | 36570758  | T     | A  | Substitution | intron_variant            | <i>AC090809.1</i> | -            |
| Twin_A | 8 | 39656195  | G     | GA | Insertion    | intron_variant            | <i>ADAM18</i>     | rs201971418  |
| Twin_A | 8 | 48680993  | A     | G  | Substitution | intron_variant            | <i>AC022915.2</i> | -            |

|        |   |           |                                      |    |              |                           |                   |              |
|--------|---|-----------|--------------------------------------|----|--------------|---------------------------|-------------------|--------------|
| Twin_A | 8 | 51711248  | T                                    | C  | Substitution | intron_variant            | <i>PXDNL</i>      | COSV62492491 |
| Twin_A | 8 | 53511516  | G                                    | GA | Insertion    | downstream_gene_variant   | <i>AC022034.1</i> | rs535409810  |
| Twin_A | 8 | 61457436  | G                                    | A  | Substitution | intron_variant            | <i>CLVSI</i>      | -            |
| Twin_A | 8 | 63967261  | A                                    | AT | Insertion    | intron_variant            | <i>LINC01414</i>  | rs5891933    |
| Twin_A | 8 | 64128898  | G                                    | A  | Substitution | intron_variant            | <i>LINC01414</i>  | rs545104948  |
| Twin_A | 8 | 65916408  | G                                    | A  | Substitution | intergenic_variant        | -                 | -            |
| Twin_A | 8 | 68253460  | T                                    | TA | Insertion    | regulatory_region_variant | -                 | rs1000407340 |
| Twin_A | 8 | 72453042  | C                                    | T  | Substitution | intergenic_variant        | -                 | rs1051744174 |
| Twin_A | 8 | 77781391  | C                                    | CT | Insertion    | intergenic_variant        | -                 | rs1198479285 |
| Twin_A | 8 | 83358311  | GGCTACA<br>GACAAAC<br>CTTCAAT<br>GGA | G  | Deletion     | intergenic_variant        | -                 | -            |
| Twin_A | 8 | 86318421  | G                                    | GA | Insertion    | intron_variant            | <i>SLC7A13</i>    | rs34723665   |
| Twin_A | 8 | 88356215  | C                                    | A  | Substitution | intron_variant            | <i>AC090578.1</i> | -            |
| Twin_A | 8 | 95037819  | G                                    | GA | Insertion    | intron_variant            | <i>NDUFAF6</i>    | rs59511473   |
| Twin_A | 8 | 104362862 | A                                    | G  | Substitution | intron_variant            | <i>DPYS</i>       | rs555618444  |
| Twin_A | 8 | 108043942 | A                                    | T  | Substitution | intron_variant            | <i>RSPO2</i>      | -            |
| Twin_A | 8 | 115536798 | G                                    | GT | Insertion    | intron_variant            | <i>TRPS1</i>      | rs900943605  |
| Twin_A | 8 | 117615713 | ATCT                                 | A  | Deletion     | regulatory_region_variant | -                 | -            |
| Twin_A | 8 | 124975564 | C                                    | G  | Substitution | intron_variant            | <i>ZNF572</i>     | -            |
| Twin_A | 8 | 129273738 | G                                    | GT | Insertion    | intron_variant            | <i>CCDC26</i>     | rs891751618  |
| Twin_A | 8 | 129372882 | C                                    | CA | Insertion    | intron_variant            | <i>CCDC26</i>     | rs560030895  |
| Twin_A | 8 | 129733477 | G                                    | A  | Substitution | downstream_gene_variant   | <i>MTRF1LP2</i>   | -            |
| Twin_A | 8 | 132428552 | CAG                                  | C  | Deletion     | intron_variant            | <i>KCNQ3</i>      | rs201318711  |
| Twin_A | 8 | 134856654 | C                                    | G  | Substitution | intron_variant            | <i>AC103764.1</i> | rs1321197388 |
| Twin_A | 8 | 135261370 | G                                    | C  | Substitution | intron_variant            | <i>LINC01591</i>  | -            |
| Twin_A | 8 | 137128263 | C                                    | T  | Substitution | intergenic_variant        | -                 | rs1053069745 |
| Twin_A | 8 | 138139847 | C                                    | T  | Substitution | intron_variant            | <i>FAM135B</i>    | rs947110030  |
| Twin_A | 8 | 143051626 | G                                    | A  | Substitution | intron_variant            | <i>C8orf31</i>    | -            |
| Twin_A | 9 | 50071     | AT                                   | A  | Deletion     | intron_variant            | <i>WASHC1</i>     | -            |
| Twin_A | 9 | 395970    | T                                    | G  | Substitution | intron_variant            | <i>DOCK8</i>      | -            |
| Twin_A | 9 | 1822815   | C                                    | T  | Substitution | intergenic_variant        | -                 | -            |
| Twin_A | 9 | 4316936   | C                                    | T  | Substitution | intron_variant            | <i>GLIS3</i>      | -            |
| Twin_A | 9 | 5368234   | T                                    | C  | Substitution | intron_variant            | <i>PLGRKT</i>     | -            |
| Twin_A | 9 | 14104419  | G                                    | GT | Insertion    | intron_variant            | <i>NFIB</i>       | rs945961609  |
| Twin_A | 9 | 17180226  | GT                                   | G  | Deletion     | intron_variant            | <i>CNTLN</i>      | rs1264390576 |
| Twin_A | 9 | 19348792  | G                                    | GA | Insertion    | intron_variant            | <i>DENND4C</i>    | rs367658826  |
| Twin_A | 9 | 23699353  | A                                    | G  | Substitution | intron_variant            | <i>ELAVL2</i>     | rs568285627  |
| Twin_A | 9 | 24066549  | G                                    | A  | Substitution | upstream_gene_variant     | <i>AL513317.1</i> | rs895109680  |
| Twin_A | 9 | 28150104  | C                                    | A  | Substitution | intron_variant            | <i>LINGO2</i>     | -            |
| Twin_A | 9 | 31556284  | G                                    | A  | Substitution | intergenic_variant        | -                 | rs12347583   |
| Twin_A | 9 | 39080916  | C                                    | T  | Substitution | intron_variant            | <i>CNTNAP3</i>    | rs369395719  |
| Twin_A | 9 | 41655135  | C                                    | T  | Substitution | upstream_gene_variant     | <i>AL591926.2</i> | rs1226839471 |

|        |    |           |     |     |              |                           |                   |              |
|--------|----|-----------|-----|-----|--------------|---------------------------|-------------------|--------------|
| Twin_A | 9  | 45155466  | G   | C   | Substitution | intergenic_variant        | -                 | rs1476645657 |
| Twin_A | 9  | 61566797  | T   | C   | Substitution | intergenic_variant        | -                 | -            |
| Twin_A | 9  | 73087756  | A   | G   | Substitution | intergenic_variant        | -                 | -            |
| Twin_A | 9  | 77004114  | C   | A   | Substitution | intergenic_variant        | -                 | -            |
| Twin_A | 9  | 81050746  | G   | A   | Substitution | intergenic_variant        | -                 | rs764741538  |
| Twin_A | 9  | 82371224  | C   | T   | Substitution | intron_variant            | <i>AL162726.3</i> | -            |
| Twin_A | 9  | 83484424  | C   | CT  | Insertion    | intron_variant            | <i>FRMD3</i>      | -            |
| Twin_A | 9  | 84858874  | G   | GA  | Insertion    | intron_variant            | <i>NTRK2</i>      | rs965433677  |
| Twin_A | 9  | 87748283  | T   | TA  | Insertion    | regulatory_region_variant | -                 | rs143725130  |
| Twin_A | 9  | 88768716  | G   | A   | Substitution | intron_variant            | <i>AL390791.1</i> | rs548341913  |
| Twin_A | 9  | 96382496  | C   | CTA | Insertion    | intron_variant            | <i>SLC35D2</i>    | rs142809659  |
| Twin_A | 9  | 101191229 | G   | A   | Substitution | intron_variant            | <i>PLPPR1</i>     | -            |
| Twin_A | 9  | 101784275 | G   | A   | Substitution | intergenic_variant        | -                 | -            |
| Twin_A | 9  | 102487319 | C   | T   | Substitution | intergenic_variant        | -                 | rs1189198082 |
| Twin_A | 9  | 111554985 | G   | T   | Substitution | 3_prime_UTR_variant       | <i>ZNF483</i>     | rs1039810650 |
| Twin_A | 9  | 118247951 | T   | C   | Substitution | intergenic_variant        | -                 | -            |
| Twin_A | 9  | 120700338 | T   | A   | Substitution | intron_variant            | <i>MEGF9</i>      | -            |
| Twin_A | 9  | 122872477 | T   | C   | Substitution | downstream_gene_variant   | <i>RC3H2</i>      | rs996687988  |
| Twin_A | 9  | 125539853 | T   | TA  | Insertion    | intron_variant            | <i>MAPKAP1</i>    | rs201724260  |
| Twin_A | 9  | 127663224 | C   | G   | Substitution | missense_variant          | <i>STXBP1</i>     | -            |
| Twin_A | 9  | 131190221 | A   | T   | Substitution | intron_variant            | <i>NUP214</i>     | -            |
| Twin_A | 9  | 134828811 | CCA | C   | Deletion     | intron_variant            | <i>COL5A1</i>     | rs906680873  |
| Twin_A | 9  | 136468856 | C   | CT  | Insertion    | intron_variant            | <i>SEC16A</i>     | -            |
| Twin_A | 10 | 4183898   | A   | G   | Substitution | regulatory_region_variant | -                 | -            |
| Twin_A | 10 | 9239651   | C   | CT  | Insertion    | intergenic_variant        | -                 | rs963757968  |
| Twin_A | 10 | 10849842  | T   | A   | Substitution | intron_variant            | <i>CELF2</i>      | rs1365457744 |
| Twin_A | 10 | 11168124  | TTC | T   | Deletion     | intron_variant            | <i>CELF2</i>      | -            |
| Twin_A | 10 | 15299120  | C   | T   | Substitution | intron_variant            | <i>FAM171A1</i>   | rs558867054  |
| Twin_A | 10 | 18976904  | C   | T   | Substitution | intergenic_variant        | -                 | rs181225799  |
| Twin_A | 10 | 23617158  | C   | CAT | Insertion    | intergenic_variant        | -                 | rs144728449  |
| Twin_A | 10 | 23958376  | G   | A   | Substitution | intron_variant            | <i>KIAA1217</i>   | -            |
| Twin_A | 10 | 27864409  | G   | GA  | Insertion    | intron_variant            | <i>ARMC4</i>      | rs998440262  |
| Twin_A | 10 | 34892061  | G   | T   | Substitution | intergenic_variant        | -                 | -            |
| Twin_A | 10 | 47221434  | C   | T   | Substitution | intergenic_variant        | -                 | -            |
| Twin_A | 10 | 54174376  | C   | CA  | Insertion    | intron_variant            | <i>PCDH15</i>     | rs112450699  |
| Twin_A | 10 | 56140794  | C   | CAT | Insertion    | intergenic_variant        | -                 | rs999676086  |
| Twin_A | 10 | 56950504  | A   | T   | Substitution | intergenic_variant        | -                 | -            |
| Twin_A | 10 | 60147699  | C   | G   | Substitution | intron_variant            | <i>ANK3</i>       | -            |
| Twin_A | 10 | 62705771  | AAT | A   | Deletion     | intron_variant            | <i>AC067751.1</i> | rs10573238   |
| Twin_A | 10 | 64210270  | G   | T   | Substitution | intron_variant            | <i>AC013287.1</i> | rs75029261   |
| Twin_A | 10 | 67571470  | TA  | T   | Deletion     | intron_variant            | <i>CTNNA3</i>     | -            |
| Twin_A | 10 | 70021310  | G   | GA  | Insertion    | upstream_gene_variant     | <i>LINC02636</i>  | rs944814046  |

|        |    |           |      |     |              |                         |                   |              |
|--------|----|-----------|------|-----|--------------|-------------------------|-------------------|--------------|
| Twin_A | 10 | 75905930  | G    | GT  | Insertion    | intron_variant          | <i>LRMDA</i>      | rs5786198    |
| Twin_A | 10 | 78393818  | G    | A   | Substitution | intron_variant          | <i>AC012560.1</i> | -            |
| Twin_A | 10 | 83188578  | G    | A   | Substitution | intergenic_variant      | -                 | rs778523013  |
| Twin_A | 10 | 83492892  | C    | T   | Substitution | intergenic_variant      | -                 | -            |
| Twin_A | 10 | 93187731  | G    | A   | Substitution | intergenic_variant      | -                 | -            |
| Twin_A | 10 | 94576898  | A    | AT  | Insertion    | intron_variant          | <i>HELLS</i>      | rs540746312  |
| Twin_A | 10 | 94950682  | A    | G   | Substitution | intron_variant          | <i>CYP2C9</i>     | rs907386662  |
| Twin_A | 10 | 103273122 | G    | A   | Substitution | upstream_gene_variant   | <i>INA</i>        | rs1286474689 |
| Twin_A | 10 | 109091857 | G    | A   | Substitution | intergenic_variant      | -                 | rs954171718  |
| Twin_A | 10 | 111830308 | A    | G   | Substitution | intron_variant          | <i>AL136119.1</i> | rs1430607514 |
| Twin_A | 10 | 113814958 | A    | G   | Substitution | intergenic_variant      | -                 | -            |
| Twin_A | 10 | 115169017 | CTT  | C   | Deletion     | intron_variant          | <i>ATRNL1</i>     | rs71010011   |
| Twin_A | 10 | 115409272 | G    | A   | Substitution | intron_variant          | <i>ATRNL1</i>     | -            |
| Twin_A | 10 | 116526803 | T    | C   | Substitution | intergenic_variant      | -                 | -            |
| Twin_A | 10 | 120224348 | T    | TA  | Insertion    | intergenic_variant      | -                 | -            |
| Twin_A | 10 | 121613197 | T    | C   | Substitution | downstream_gene_variant | <i>AC009988.1</i> | -            |
| Twin_A | 10 | 122518538 | G    | A   | Substitution | downstream_gene_variant | <i>HTRA1</i>      | rs568255913  |
| Twin_A | 10 | 124140841 | T    | C   | Substitution | intergenic_variant      | -                 | rs1455378017 |
| Twin_A | 10 | 124588678 | T    | G   | Substitution | intron_variant          | <i>LHPP</i>       | -            |
| Twin_A | 11 | 6802600   | C    | T   | Substitution | upstream_gene_variant   | <i>OR6A2</i>      | rs745932107  |
| Twin_A | 11 | 12635917  | G    | A   | Substitution | intron_variant          | <i>AC107881.1</i> | rs1470450176 |
| Twin_A | 11 | 17634218  | C    | T   | Substitution | stop_gained             | <i>OTOG</i>       | rs866476223  |
| Twin_A | 11 | 18214790  | G    | A   | Substitution | downstream_gene_variant | <i>SLC25A51P4</i> | -            |
| Twin_A | 11 | 25629284  | G    | T   | Substitution | upstream_gene_variant   | <i>AC100770.1</i> | -            |
| Twin_A | 11 | 27431935  | C    | T   | Substitution | intron_variant          | <i>LGR4</i>       | rs187542892  |
| Twin_A | 11 | 29268317  | G    | GTA | Insertion    | downstream_gene_variant | <i>AC090791.1</i> | rs57529313   |
| Twin_A | 11 | 30414572  | A    | AT  | Insertion    | intron_variant          | <i>MPPED2</i>     | rs574457624  |
| Twin_A | 11 | 34947336  | TAC  | T   | Deletion     | intron_variant          | <i>PDHX</i>       | rs201136678  |
| Twin_A | 11 | 40970112  | A    | T   | Substitution | intron_variant          | <i>LRRC4C</i>     | -            |
| Twin_A | 11 | 42181489  | A    | AT  | Insertion    | downstream_gene_variant | <i>LINC02740</i>  | rs1268779757 |
| Twin_A | 11 | 42992114  | T    | A   | Substitution | intergenic_variant      | -                 | -            |
| Twin_A | 11 | 49443145  | TATC | T   | Deletion     | intergenic_variant      | -                 | rs1327126227 |
| Twin_A | 11 | 59547928  | A    | G   | Substitution | intron_variant          | <i>AP003778.1</i> | -            |
| Twin_A | 11 | 62907973  | C    | T   | Substitution | downstream_gene_variant | <i>M1</i>         | -            |
| Twin_A | 11 | 69424352  | G    | A   | Substitution | upstream_gene_variant   | <i>AP000439.2</i> | -            |
| Twin_A | 11 | 70172132  | A    | G   | Substitution | intron_variant          | <i>ANO1</i>       | rs11235475   |
| Twin_A | 11 | 71917009  | GTTA | G   | Deletion     | downstream_gene_variant | <i>AP002495.1</i> | rs550657033  |
| Twin_A | 11 | 72630002  | T    | A   | Substitution | intron_variant          | <i>PDE2A</i>      | rs956005801  |
| Twin_A | 11 | 78991748  | C    | T   | Substitution | intron_variant          | <i>TENM4</i>      | -            |
| Twin_A | 11 | 83859358  | A    | G   | Substitution | intron_variant          | <i>DLG2</i>       | -            |
| Twin_A | 11 | 83984865  | G    | A   | Substitution | intron_variant          | <i>DLG2</i>       | rs2514172    |
| Twin_A | 11 | 87084313  | C    | CT  | Insertion    | intron_variant          | <i>TMEM135</i>    | rs5793234    |

|        |    |           |     |     |              |                           |                   |              |
|--------|----|-----------|-----|-----|--------------|---------------------------|-------------------|--------------|
| Twin_A | 11 | 89364256  | TTC | T   | Deletion     | intron_variant            | <i>NOX4</i>       | -            |
| Twin_A | 11 | 91531418  | GTC | G   | Deletion     | intergenic_variant        | -                 | rs57259378   |
| Twin_A | 11 | 92625315  | G   | A   | Substitution | intron_variant            | <i>FAT3</i>       | rs1044839433 |
| Twin_A | 11 | 93542010  | C   | T   | Substitution | intron_variant            | <i>SMCO4</i>      | rs1238441458 |
| Twin_A | 11 | 93572399  | A   | T   | Substitution | regulatory_region_variant | -                 | -            |
| Twin_A | 11 | 96395662  | G   | GA  | Insertion    | downstream_gene_variant   | <i>JRKL</i>       | rs1197147759 |
| Twin_A | 11 | 98979001  | G   | GCA | Insertion    | intergenic_variant        | -                 | rs5793962    |
| Twin_A | 11 | 99123208  | G   | GT  | Insertion    | downstream_gene_variant   | <i>RN7SKP53</i>   | rs370959291  |
| Twin_A | 11 | 105917523 | A   | G   | Substitution | intron_variant            | <i>GRIA4</i>      | -            |
| Twin_A | 11 | 112108171 | G   | T   | Substitution | intron_variant            | <i>AP002884.2</i> | -            |
| Twin_A | 11 | 118973448 | G   | T   | Substitution | intron_variant            | <i>FOXR1</i>      | -            |
| Twin_A | 11 | 121731425 | T   | C   | Substitution | intron_variant            | <i>AP001977.1</i> | -            |
| Twin_A | 11 | 130155838 | CA  | C   | Deletion     | upstream_gene_variant     | <i>ST14</i>       | rs71061368   |
| Twin_A | 11 | 133629356 | A   | T   | Substitution | intergenic_variant        | -                 | -            |
| Twin_A | 12 | 8992708   | A   | AT  | Insertion    | intron_variant            | <i>KLRG1</i>      | rs1011939413 |
| Twin_A | 12 | 14002642  | GTA | G   | Deletion     | intergenic_variant        | -                 | rs767637242  |
| Twin_A | 12 | 27135862  | C   | A   | Substitution | intron_variant            | <i>AC092747.1</i> | -            |
| Twin_A | 12 | 33793906  | A   | G   | Substitution | intergenic_variant        | -                 | rs1160899620 |
| Twin_A | 12 | 37544249  | GGT | G   | Deletion     | intergenic_variant        | -                 | rs139856566  |
| Twin_A | 12 | 39556427  | T   | A   | Substitution | intron_variant            | <i>ABCD2</i>      | -            |
| Twin_A | 12 | 45801804  | CAG | C   | Deletion     | intron_variant            | <i>ARID2</i>      | rs200185178  |
| Twin_A | 12 | 47093368  | A   | AT  | Insertion    | intron_variant            | <i>PCED1B</i>     | rs142397807  |
| Twin_A | 12 | 54193118  | A   | G   | Substitution | upstream_gene_variant     | <i>SMUG1</i>      | -            |
| Twin_A | 12 | 55987166  | G   | GT  | Insertion    | intron_variant            | <i>RAB5B</i>      | rs34223637   |
| Twin_A | 12 | 61094238  | T   | C   | Substitution | intergenic_variant        | -                 | rs795318     |
| Twin_A | 12 | 61096059  | C   | T   | Substitution | intergenic_variant        | -                 | -            |
| Twin_A | 12 | 63499491  | A   | T   | Substitution | intergenic_variant        | -                 | rs367633111  |
| Twin_A | 12 | 67241412  | G   | GA  | Insertion    | intergenic_variant        | -                 | rs570864048  |
| Twin_A | 12 | 80465550  | CA  | C   | Deletion     | intron_variant            | <i>PTPRQ</i>      | rs1565723030 |
| Twin_A | 12 | 96021004  | T   | A   | Substitution | intron_variant            | <i>LTA4H</i>      | -            |
| Twin_A | 12 | 99195605  | T   | C   | Substitution | intron_variant            | <i>ANKS1B</i>     | -            |
| Twin_A | 12 | 99570645  | C   | CA  | Insertion    | intron_variant            | <i>ANKS1B</i>     | rs34453262   |
| Twin_A | 12 | 100385137 | A   | T   | Substitution | intron_variant            | <i>SLC17A8</i>    | rs564312355  |
| Twin_A | 12 | 101478301 | G   | A   | Substitution | intron_variant            | <i>SPIC</i>       | -            |
| Twin_A | 12 | 111703138 | A   | G   | Substitution | intron_variant            | <i>ACAD10</i>     | -            |
| Twin_A | 12 | 112201473 | G   | GA  | Insertion    | intron_variant            | <i>HECTD4</i>     | rs59104653   |
| Twin_A | 12 | 117866839 | T   | TA  | Insertion    | intron_variant            | <i>KSR2</i>       | rs34463256   |
| Twin_A | 12 | 120238552 | T   | A   | Substitution | intron_variant            | <i>PXN</i>        | -            |
| Twin_A | 12 | 129194036 | A   | G   | Substitution | intron_variant            | <i>TMEM132D</i>   | -            |
| Twin_A | 12 | 129699976 | C   | T   | Substitution | missense_variant          | <i>TMEM132D</i>   | COSV70606773 |
| Twin_A | 12 | 130201343 | C   | T   | Substitution | intergenic_variant        | -                 | rs752475595  |
| Twin_A | 12 | 131372998 | C   | T   | Substitution | downstream_gene_variant   | <i>AC140118.1</i> | rs1044089851 |



|        |    |           |       |                       |              |                                    |            |              |
|--------|----|-----------|-------|-----------------------|--------------|------------------------------------|------------|--------------|
| Twin_A | 12 | 131449745 | T     | TTATAT<br>ATATAT<br>A | Insertion    | intron_variant                     | AC073578.2 | rs60625980   |
| Twin_A | 12 | 131913217 | G     | T                     | Substitution | synonymous_variant                 | ULK1       | COSV58854885 |
| Twin_A | 12 | 132658754 | CG    | C                     | Deletion     | intron_variant                     | POLE       | -            |
| Twin_A | 13 | 16312671  | T     | G                     | Substitution | intergenic_variant                 | -          | rs1452678559 |
| Twin_A | 13 | 19458900  | T     | C                     | Substitution | intron_variant                     | TPTE2      | -            |
| Twin_A | 13 | 21198801  | T     | A                     | Substitution | regulatory_region_variant          | -          | -            |
| Twin_A | 13 | 21198803  | G     | T                     | Substitution | regulatory_region_variant          | -          | -            |
| Twin_A | 13 | 22486341  | G     | A                     | Substitution | intergenic_variant                 | -          | -            |
| Twin_A | 13 | 24407230  | C     | T                     | Substitution | upstream_gene_variant              | TPTE2P6    | -            |
| Twin_A | 13 | 27747684  | T     | C                     | Substitution | downstream_gene_variant            | POLR1D     | rs530116991  |
| Twin_A | 13 | 33789922  | C     | T                     | Substitution | regulatory_region_variant          | -          | -            |
| Twin_A | 13 | 35458160  | C     | G                     | Substitution | intron_variant                     | NBEA       | -            |
| Twin_A | 13 | 40248330  | G     | A                     | Substitution | intron_variant                     | LINC00598  | rs570712758  |
| Twin_A | 13 | 44807574  | G     | A                     | Substitution | intron_variant                     | LINC00330  | -            |
| Twin_A | 13 | 51185115  | A     | T                     | Substitution | intron_variant                     | C13orf42   | rs982603544  |
| Twin_A | 13 | 54356322  | T     | A                     | Substitution | regulatory_region_variant          | -          | -            |
| Twin_A | 13 | 57950093  | C     | T                     | Substitution | intergenic_variant                 | -          | -            |
| Twin_A | 13 | 60127004  | G     | A                     | Substitution | intron_variant                     | DIAPH3     | -            |
| Twin_A | 13 | 61979712  | AT    | A                     | Deletion     | intergenic_variant                 | -          | -            |
| Twin_A | 13 | 86387551  | T     | TA                    | Insertion    | intergenic_variant                 | -          | rs578195336  |
| Twin_A | 13 | 95408931  | G     | T                     | Substitution | intergenic_variant                 | -          | -            |
| Twin_A | 13 | 97673189  | G     | A                     | Substitution | downstream_gene_variant            | AL359502.1 | rs1006927199 |
| Twin_A | 13 | 100032713 | C     | CA                    | Insertion    | upstream_gene_variant              | NDUFA12P1  | rs914603334  |
| Twin_A | 13 | 110038016 | G     | GCA                   | Insertion    | intron_variant                     | AL390755.1 | rs34470615   |
| Twin_A | 13 | 112177050 | A     | T                     | Substitution | intergenic_variant                 | -          | -            |
| Twin_A | 13 | 112393758 | C     | T                     | Substitution | intron_variant                     | SPACA7     | -            |
| Twin_A | 14 | 27812525  | AAG   | A                     | Deletion     | intron_variant                     | AL390334.1 | rs368944583  |
| Twin_A | 14 | 27980040  | G     | A                     | Substitution | intergenic_variant                 | -          | -            |
| Twin_A | 14 | 29729980  | G     | A                     | Substitution | intron_variant                     | PRKD1      | rs536812458  |
| Twin_A | 14 | 30110595  | C     | CT                    | Insertion    | intron_variant                     | PRKD1      | rs1412349193 |
| Twin_A | 14 | 37141508  | T     | TA                    | Insertion    | intron_variant                     | SLC25A21   | rs533050099  |
| Twin_A | 14 | 39514017  | ATATC | A                     | Deletion     | downstream_gene_variant            | AL049828.1 | rs78432958   |
| Twin_A | 14 | 58577605  | T     | A                     | Substitution | intergenic_variant                 | -          | -            |
| Twin_A | 14 | 59907903  | T     | C                     | Substitution | intergenic_variant                 | -          | -            |
| Twin_A | 14 | 59942776  | C     | CT                    | Insertion    | intron_variant                     | LRRC9      | rs1440781193 |
| Twin_A | 14 | 61869166  | A     | G                     | Substitution | intron_variant                     | SYT16      | -            |
| Twin_A | 14 | 81424362  | TG    | T                     | Deletion     | intron_variant                     | STON2      | -            |
| Twin_A | 14 | 87211954  | G     | GA                    | Insertion    | regulatory_region_variant          | -          | -            |
| Twin_A | 15 | 17735761  | T     | G                     | Substitution | intergenic_variant                 | -          | rs1425932497 |
| Twin_A | 15 | 24574554  | C     | A                     | Substitution | non_coding_transcript_exon_variant | PWRN1      | -            |
| Twin_A | 15 | 25170693  | A     | G                     | Substitution | upstream_gene_variant              | SNORD115   | -            |

|        |    |          |      |                 |              |                           |                   |              |
|--------|----|----------|------|-----------------|--------------|---------------------------|-------------------|--------------|
| Twin_A | 15 | 27699074 | C    | T               | Substitution | intergenic_variant        | -                 | rs979345355  |
| Twin_A | 15 | 27798227 | G    | A               | Substitution | intron_variant            | <i>OCA2</i>       | rs575593376  |
| Twin_A | 15 | 56330772 | G    | GA              | Insertion    | intron_variant            | <i>TEX9</i>       | rs202192979  |
| Twin_A | 15 | 58918915 | C    | CT              | Insertion    | intron_variant            | <i>SLTM</i>       | rs566389959  |
| Twin_A | 15 | 60956234 | G    | GT              | Insertion    | intron_variant            | <i>RORA</i>       | rs796500717  |
| Twin_A | 15 | 63420915 | CAT  | C               | Deletion     | intron_variant            | <i>LINC02568</i>  | rs142303229  |
| Twin_A | 15 | 69253960 | G    | A               | Substitution | intron_variant            | <i>GLCE</i>       | -            |
| Twin_A | 15 | 80950475 | T    | A               | Substitution | 3_prime_UTR_variant       | <i>CEMP</i>       | -            |
| Twin_A | 15 | 83158851 | C    | CT              | Insertion    | intron_variant            | <i>HDGFL3</i>     | rs554737989  |
| Twin_A | 15 | 96972773 | A    | G               | Substitution | intergenic_variant        | -                 | -            |
| Twin_A | 15 | 99025033 | T    | A               | Substitution | intron_variant            | <i>AC036108.1</i> | -            |
| Twin_A | 16 | 3192939  | A    | AT              | Insertion    | intron_variant            | <i>AJ003147.2</i> | -            |
| Twin_A | 16 | 7113874  | T    | C               | Substitution | intron_variant            | <i>RBFOX1</i>     | -            |
| Twin_A | 16 | 7450654  | G    | A               | Substitution | intron_variant            | <i>RBFOX1</i>     | rs146577787  |
| Twin_A | 16 | 7806761  | G    | A               | Substitution | intergenic_variant        | -                 | rs752635066  |
| Twin_A | 16 | 8247620  | G    | A               | Substitution | intergenic_variant        | -                 | rs942245726  |
| Twin_A | 16 | 8372617  | C    | T               | Substitution | intron_variant            | <i>AC018767.1</i> | rs909464601  |
| Twin_A | 16 | 11338624 | C    | CT              | Insertion    | intron_variant            | <i>RM12</i>       | rs377660326  |
| Twin_A | 16 | 13671261 | G    | A               | Substitution | intergenic_variant        | -                 | rs544425045  |
| Twin_A | 16 | 22306291 | C    | T               | Substitution | intron_variant            | <i>POLR3E</i>     | -            |
| Twin_A | 16 | 25681378 | C    | T               | Substitution | intergenic_variant        | -                 | -            |
| Twin_A | 16 | 34085953 | C    | T               | Substitution | regulatory_region_variant | -                 | rs759751179  |
| Twin_A | 16 | 35232723 | C    | A               | Substitution | intron_variant            | <i>AC023824.3</i> | -            |
| Twin_A | 16 | 35736091 | G    | A               | Substitution | downstream_gene_variant   | <i>RNA5SP407</i>  | rs1168416095 |
| Twin_A | 16 | 47099927 | C    | T               | Substitution | intron_variant            | <i>NETO2</i>      | -            |
| Twin_A | 16 | 47823047 | C    | A               | Substitution | intron_variant            | <i>LINC02133</i>  | -            |
| Twin_A | 16 | 48066801 | G    | T               | Substitution | intergenic_variant        | -                 | -            |
| Twin_A | 16 | 49303993 | C    | T               | Substitution | intron_variant            | <i>AC007614.1</i> | -            |
| Twin_A | 16 | 49413774 | A    | C               | Substitution | regulatory_region_variant | -                 | -            |
| Twin_A | 16 | 51823583 | C    | T               | Substitution | intergenic_variant        | -                 | -            |
| Twin_A | 16 | 52276870 | G    | A               | Substitution | intron_variant            | <i>CASC22</i>     | -            |
| Twin_A | 16 | 52638073 | C    | T               | Substitution | intron_variant            | <i>CASC16</i>     | rs995891657  |
| Twin_A | 16 | 61886296 | T    | TA              | Insertion    | intron_variant            | <i>CDH8</i>       | rs535315018  |
| Twin_A | 16 | 64432341 | G    | GT              | Insertion    | intron_variant            | <i>AC092131.1</i> | rs901796829  |
| Twin_A | 16 | 64614439 | G    | A               | Substitution | intergenic_variant        | -                 | -            |
| Twin_A | 16 | 64919655 | T    | A               | Substitution | intergenic_variant        | -                 | -            |
| Twin_A | 16 | 66602481 | T    | TA              | Insertion    | upstream_gene_variant     | <i>CMTM3</i>      | rs145668319  |
| Twin_A | 16 | 67608941 | A    | G               | Substitution | intron_variant            | <i>CTCF</i>       | rs892105462  |
| Twin_A | 16 | 71030715 | G    | C               | Substitution | intron_variant            | <i>HYDIN</i>      | rs12102892   |
| Twin_A | 16 | 72362589 | G    | T               | Substitution | intron_variant            | <i>LINC01572</i>  | -            |
| Twin_A | 16 | 74358477 | G    | GTGTGT<br>GTGTA | Insertion    | intron_variant            | <i>AC009053.1</i> | rs1355695440 |
| Twin_A | 16 | 77781037 | CAGG | C               | Deletion     | regulatory_region_variant | -                 | rs145741815  |

|        |    |          |      |    |              |                                                  |                   |              |
|--------|----|----------|------|----|--------------|--------------------------------------------------|-------------------|--------------|
| Twin_A | 16 | 83070380 | C    | T  | Substitution | intron_variant                                   | <i>CDH13</i>      | -            |
| Twin_A | 16 | 85313584 | C    | A  | Substitution | intron_variant                                   | <i>GSE1</i>       | rs1483404740 |
| Twin_A | 16 | 86284090 | G    | A  | Substitution | intron_variant                                   | <i>LINC01081</i>  | -            |
| Twin_A | 17 | 578020   | G    | C  | Substitution | intron_variant                                   | <i>VPS53</i>      | -            |
| Twin_A | 17 | 2793153  | AT   | A  | Deletion     | upstream_gene_variant                            | <i>RAP1GAP2</i>   | rs200252910  |
| Twin_A | 17 | 8040550  | GA   | G  | Deletion     | intron_variant                                   | <i>ALOX15B</i>    | rs57248868   |
| Twin_A | 17 | 8080028  | C    | T  | Substitution | non_coding_transcript_exon_variant               | <i>AC129492.1</i> | -            |
| Twin_A | 17 | 9019997  | A    | G  | Substitution | upstream_gene_variant                            | <i>NTN1</i>       | -            |
| Twin_A | 17 | 9546387  | TA   | T  | Deletion     | intron_variant                                   | <i>STX8</i>       | rs56901611   |
| Twin_A | 17 | 14728731 | G    | A  | Substitution | intron_variant                                   | <i>AC013248.1</i> | -            |
| Twin_A | 17 | 15719138 | C    | CA | Insertion    | 3_prime_UTR_variant                              | <i>ZNF286A</i>    | rs372793188  |
| Twin_A | 17 | 32918315 | T    | G  | Substitution | regulatory_region_variant                        | -                 | -            |
| Twin_A | 17 | 34590397 | T    | C  | Substitution | intron_variant                                   | <i>TMEM132E</i>   | rs1390883369 |
| Twin_A | 17 | 34849723 | CACA | C  | Deletion     | intron_variant                                   | <i>AC022903.1</i> | rs952016458  |
| Twin_A | 17 | 41287213 | A    | G  | Substitution | regulatory_region_variant                        | -                 | -            |
| Twin_A | 17 | 48780087 | G    | GA | Insertion    | intron_variant                                   | <i>TLL6</i>       | rs371091415  |
| Twin_A | 17 | 63184014 | C    | CA | Insertion    | intron_variant                                   | <i>TANC2</i>      | rs570141267  |
| Twin_A | 17 | 64353316 | C    | T  | Substitution | intron_variant                                   | <i>PECAM1</i>     | rs879198491  |
| Twin_A | 17 | 66569297 | G    | A  | Substitution | intron_variant                                   | <i>PRKCA</i>      | rs540966408  |
| Twin_A | 17 | 72065475 | G    | A  | Substitution | intron_variant                                   | <i>AC007461.1</i> | -            |
| Twin_A | 17 | 72109757 | C    | T  | Substitution | intron_variant,<br>non_coding_transcript_variant | <i>SOX9-AS1</i>   | -            |
| Twin_A | 17 | 73729002 | C    | G  | Substitution | intergenic_variant                               | -                 | -            |
| Twin_A | 17 | 78164605 | G    | A  | Substitution | upstream_gene_variant                            | <i>SYNGR2</i>     | -            |
| Twin_A | 17 | 79118078 | G    | A  | Substitution | intron_variant                                   | <i>RBFOX3</i>     | rs560513487  |
| Twin_A | 17 | 82853402 | C    | CT | Insertion    | intron_variant                                   | <i>TBCD</i>       | -            |
| Twin_A | 18 | 9601220  | A    | G  | Substitution | intron_variant                                   | <i>PPP4R1</i>     | rs982592192  |
| Twin_A | 18 | 14227264 | CAA  | C  | Deletion     | intron_variant                                   | <i>ANKRD20A5P</i> | rs200661335  |
| Twin_A | 18 | 20189631 | G    | A  | Substitution | intergenic_variant                               | -                 | rs1337042912 |
| Twin_A | 18 | 20830406 | G    | A  | Substitution | intergenic_variant                               | -                 | -            |
| Twin_A | 18 | 27867692 | T    | C  | Substitution | intergenic_variant                               | -                 | -            |
| Twin_A | 18 | 29896712 | C    | T  | Substitution | intergenic_variant                               | -                 | -            |
| Twin_A | 18 | 32161626 | G    | T  | Substitution | intron_variant                                   | <i>GAREM1</i>     | -            |
| Twin_A | 18 | 32191812 | T    | C  | Substitution | intron_variant                                   | <i>MEP1B</i>      | -            |
| Twin_A | 18 | 33837694 | C    | A  | Substitution | regulatory_region_variant                        | -                 | -            |
| Twin_A | 18 | 34514791 | G    | A  | Substitution | intron_variant                                   | <i>DTNA</i>       | -            |
| Twin_A | 18 | 41122265 | A    | G  | Substitution | intergenic_variant                               | -                 | -            |
| Twin_A | 18 | 50652311 | G    | A  | Substitution | intron_variant                                   | <i>MAPK4</i>      | -            |
| Twin_A | 18 | 51531692 | G    | A  | Substitution | intron_variant                                   | <i>LINC01630</i>  | -            |
| Twin_A | 18 | 52758063 | C    | T  | Substitution | intron_variant                                   | <i>DCC</i>        | rs75634824   |
| Twin_A | 18 | 53231840 | T    | C  | Substitution | intron_variant                                   | <i>DCC</i>        | rs1236652956 |
| Twin_A | 18 | 56463814 | T    | TA | Insertion    | intergenic_variant                               | -                 | rs139733893  |
| Twin_A | 18 | 57470379 | T    | C  | Substitution | intron_variant                                   | <i>ONECUT2</i>    | -            |

|        |    |          |                                                                                   |               |              |                           |                   |              |
|--------|----|----------|-----------------------------------------------------------------------------------|---------------|--------------|---------------------------|-------------------|--------------|
| Twin_A | 18 | 63454630 | A                                                                                 | AT            | Insertion    | regulatory_region_variant | -                 | rs900204433  |
| Twin_A | 18 | 68909930 | A                                                                                 | T             | Substitution | intron_variant            | <i>CCDC102B</i>   | -            |
| Twin_A | 18 | 70340966 | C                                                                                 | G             | Substitution | upstream_gene_variant     | <i>LIVAR</i>      | -            |
| Twin_A | 18 | 75784106 | G                                                                                 | A             | Substitution | intergenic_variant        | -                 | -            |
| Twin_A | 18 | 76850613 | G                                                                                 | GT            | Insertion    | intron_variant            | <i>ZNF236</i>     | -            |
| Twin_A | 19 | 3661315  | C                                                                                 | A             | Substitution | intron_variant            | <i>PIP5K1C</i>    | -            |
| Twin_A | 19 | 7346680  | T                                                                                 | C             | Substitution | upstream_gene_variant     | <i>AC119396.1</i> | -            |
| Twin_A | 19 | 10065329 | CAA                                                                               | C             | Deletion     | intron_variant            | <i>C3P1</i>       | -            |
| Twin_A | 19 | 12943750 | AGCAGAG<br>GCTTAAG<br>GAGGAGG<br>AAGAAGA<br>CAAGAAA<br>CGCAAAG<br>AGGAGGA<br>GGAG | A             | Deletion     | frameshift_variant        | <i>CALR</i>       | rs1555760738 |
| Twin_A | 19 | 14455965 | T                                                                                 | TA            | Insertion    | intron_variant            | <i>PKNI</i>       | rs540413655  |
| Twin_A | 19 | 15471572 | G                                                                                 | C             | Substitution | intron_variant            | <i>PGLYRP2</i>    | -            |
| Twin_A | 19 | 16234332 | C                                                                                 | T             | Substitution | intron_variant            | <i>AP1M1</i>      | rs1266106157 |
| Twin_A | 19 | 22883084 | C                                                                                 | T             | Substitution | regulatory_region_variant | -                 | -            |
| Twin_A | 19 | 22892036 | CT                                                                                | C             | Deletion     | intergenic_variant        | -                 | rs59650600   |
| Twin_A | 19 | 27404653 | C                                                                                 | G             | Substitution | intergenic_variant        | -                 | -            |
| Twin_A | 19 | 27753864 | G                                                                                 | T             | Substitution | downstream_gene_variant   | <i>AC006504.1</i> | -            |
| Twin_A | 19 | 28326785 | C                                                                                 | T             | Substitution | intron_variant            | <i>AC005580.1</i> | rs1436772262 |
| Twin_A | 19 | 28434046 | C                                                                                 | T             | Substitution | upstream_gene_variant     | <i>AC005307.1</i> | rs1029855214 |
| Twin_A | 19 | 40522348 | A                                                                                 | T             | Substitution | intron_variant            | <i>SPTBN4</i>     | rs1434639441 |
| Twin_A | 19 | 44493750 | T                                                                                 | TCTCTC<br>TTG | Insertion    | intron_variant            | <i>ZNF180</i>     | rs1258057463 |
| Twin_A | 19 | 48040435 | C                                                                                 | A             | Substitution | intron_variant            | <i>CABP5</i>      | -            |
| Twin_A | 19 | 54956200 | CAAGG                                                                             | C             | Deletion     | intron_variant            | <i>NLRP7</i>      | rs752034667  |
| Twin_A | 19 | 55462076 | G                                                                                 | GGA           | Insertion    | upstream_gene_variant     | <i>ISOC2</i>      | -            |
| Twin_A | 20 | 4322280  | G                                                                                 | GT            | Insertion    | regulatory_region_variant | -                 | rs921737367  |
| Twin_A | 20 | 13915926 | C                                                                                 | G             | Substitution | intron_variant            | <i>SEL1L2</i>     | rs1392345509 |
| Twin_A | 20 | 24530811 | G                                                                                 | GT            | Insertion    | intron_variant            | <i>SYNDIG1</i>    | rs374193810  |
| Twin_A | 20 | 28628245 | A                                                                                 | G             | Substitution | intergenic_variant        | -                 | rs879967418  |
| Twin_A | 20 | 39766967 | C                                                                                 | T             | Substitution | intron_variant            | <i>ALI18523.1</i> | rs1468797562 |
| Twin_A | 20 | 42620323 | G                                                                                 | C             | Substitution | intron_variant            | <i>PTPRT</i>      | -            |
| Twin_A | 20 | 44696207 | C                                                                                 | A             | Substitution | upstream_gene_variant     | <i>ALI39352.1</i> | -            |
| Twin_A | 20 | 45737606 | A                                                                                 | T             | Substitution | intergenic_variant        | -                 | -            |
| Twin_A | 20 | 51168664 | C                                                                                 | A             | Substitution | intergenic_variant        | -                 | -            |
| Twin_A | 20 | 53076039 | C                                                                                 | T             | Substitution | intron_variant            | <i>TSHZ2</i>      | rs559693937  |
| Twin_A | 20 | 55145960 | T                                                                                 | C             | Substitution | intergenic_variant        | -                 | -            |
| Twin_A | 20 | 55476594 | G                                                                                 | A             | Substitution | intron_variant            | <i>LINC01440</i>  | rs910371781  |
| Twin_A | 20 | 57038323 | C                                                                                 | T             | Substitution | intergenic_variant        | -                 | -            |
| Twin_A | 21 | 10536357 | C                                                                                 | T             | Substitution | intron_variant            | <i>TPTE</i>       | -            |
| Twin_A | 21 | 18807398 | GCA                                                                               | G             | Deletion     | intergenic_variant        | -                 | rs56088107   |
| Twin_A | 21 | 24361606 | G                                                                                 | GT            | Insertion    | intron_variant            | <i>LINC01684</i>  | rs564109768  |

|        |    |          |       |             |              |                                    |                   |              |
|--------|----|----------|-------|-------------|--------------|------------------------------------|-------------------|--------------|
| Twin_A | 21 | 25056551 | G     | A           | Substitution | intron_variant                     | <i>AP000235.1</i> | rs529745996  |
| Twin_A | 21 | 25235168 | GTTT  | G           | Deletion     | intron_variant                     | <i>AP001341.1</i> | -            |
| Twin_A | 21 | 26121394 | C     | CT          | Insertion    | intron_variant                     | <i>APP</i>        | rs147930861  |
| Twin_A | 21 | 27842645 | T     | C           | Substitution | intergenic_variant                 | -                 | -            |
| Twin_A | 21 | 28932587 | T     | C           | Substitution | synonymous_variant                 | <i>LTN1</i>       | -            |
| Twin_A | 21 | 31309695 | A     | G           | Substitution | intron_variant                     | <i>TIAMI</i>      | -            |
| Twin_A | 21 | 32999596 | A     | T           | Substitution | intron_variant                     | <i>AP000282.1</i> | rs1265368759 |
| Twin_A | 21 | 35313715 | G     | A           | Substitution | intron_variant                     | <i>RUNX1</i>      | rs1050527217 |
| Twin_A | 21 | 35666262 | C     | T           | Substitution | intron_variant                     | <i>RUNX1</i>      | -            |
| Twin_A | 21 | 37443516 | T     | G           | Substitution | intron_variant                     | <i>DYRK1A</i>     | rs575428175  |
| Twin_A | 21 | 41859981 | G     | T           | Substitution | intron_variant                     | <i>PRDM15</i>     | -            |
| Twin_A | 21 | 42078747 | A     | G           | Substitution | intron_variant                     | <i>UMODL1</i>     | -            |
| Twin_A | 22 | 12521506 | A     | T           | Substitution | intergenic_variant                 | -                 | rs1476432335 |
| Twin_A | 22 | 15748369 | C     | T           | Substitution | downstream_gene_variant            | <i>GRAMD4P2</i>   | rs529661114  |
| Twin_A | 22 | 16418819 | G     | A           | Substitution | intergenic_variant                 | -                 | rs73387994   |
| Twin_A | 22 | 20582589 | G     | A           | Substitution | intron_variant                     | <i>MED15</i>      | rs765884898  |
| Twin_A | 22 | 30118881 | G     | A           | Substitution | intron_variant                     | <i>HORMAD2</i>    | -            |
| Twin_A | 22 | 33353441 | A     | G           | Substitution | intron_variant                     | <i>LARGE1</i>     | rs1007665809 |
| Twin_A | 22 | 34641670 | G     | A           | Substitution | non_coding_transcript_exon_variant | <i>AL021877.2</i> | rs765266284  |
| Twin_A | 22 | 37322215 | G     | A           | Substitution | intergenic_variant                 | -                 | rs898967364  |
| Twin_A | 22 | 44313831 | C     | T           | Substitution | upstream_gene_variant              | <i>SHISAL1</i>    | -            |
| Twin_A | 22 | 45732457 | C     | CA          | Insertion    | intron_variant                     | <i>ATXN10</i>     | rs971974596  |
| Twin_A | 22 | 50478755 | C     | G           | Substitution | upstream_gene_variant              | <i>SBF1</i>       | -            |
| Twin_A | X  | 1688073  | G     | A           | Substitution | intergenic_variant                 | -                 | rs1402629241 |
| Twin_A | X  | 3810086  | TAC   | T           | Deletion     | intergenic_variant                 | -                 | rs768564761  |
| Twin_A | X  | 9793750  | C     | CT          | Insertion    | intron_variant                     | <i>SHROOM2</i>    | rs368389307  |
| Twin_A | X  | 10753565 | T     | TG          | Insertion    | intron_variant                     | <i>MID1</i>       | rs745425008  |
| Twin_A | X  | 20062481 | T     | TA          | Insertion    | intron_variant                     | <i>MAP7D2</i>     | rs141341947  |
| Twin_A | X  | 21515041 | T     | TA          | Insertion    | intron_variant                     | <i>CNKSR2</i>     | rs111880925  |
| Twin_A | X  | 26568200 | C     | T           | Substitution | intron_variant                     | <i>VENTXP1</i>    | rs760685569  |
| Twin_A | X  | 35432699 | T     | C           | Substitution | intergenic_variant                 | -                 | -            |
| Twin_A | X  | 41283486 | G     | T           | Substitution | intergenic_variant                 | -                 | -            |
| Twin_A | X  | 43355581 | AAG   | A           | Deletion     | intron_variant                     | <i>AL023574.1</i> | rs747346757  |
| Twin_A | X  | 48123449 | G     | A           | Substitution | downstream_gene_variant            | <i>SSX6P</i>      | rs1311655959 |
| Twin_A | X  | 53838712 | T     | TTTTTT<br>C | Insertion    | intergenic_variant                 | -                 | rs1491090843 |
| Twin_A | X  | 56963616 | T     | TCA         | Insertion    | intron_variant                     | <i>SPIN3</i>      | rs367803469  |
| Twin_A | X  | 64210261 | C     | CA          | Insertion    | upstream_gene_variant              | <i>AMER1</i>      | rs1361525685 |
| Twin_A | X  | 66930421 | A     | T           | Substitution | intergenic_variant                 | -                 | -            |
| Twin_A | X  | 69456838 | G     | GT          | Insertion    | intergenic_variant                 | -                 | rs367604349  |
| Twin_A | X  | 73938408 | AAAAT | A           | Deletion     | downstream_gene_variant            | <i>FTX</i>        | rs1467359046 |
| Twin_A | X  | 74173149 | C     | CA          | Insertion    | upstream_gene_variant              | <i>ATP5MDP1</i>   | rs1215712048 |
| Twin_A | X  | 80107643 | A     | T           | Substitution | intergenic_variant                 | -                 | -            |

|        |   |           |     |    |              |                         |                   |              |
|--------|---|-----------|-----|----|--------------|-------------------------|-------------------|--------------|
| Twin_A | X | 102759593 | AAC | A  | Deletion     | intergenic_variant      | -                 | rs4009667    |
| Twin_A | X | 105950823 | CAG | C  | Deletion     | intron_variant          | <i>NRK</i>        | rs746466025  |
| Twin_A | X | 113523343 | C   | G  | Substitution | downstream_gene_variant | <i>AC233289.1</i> | -            |
| Twin_A | X | 114062259 | G   | GT | Insertion    | upstream_gene_variant   | <i>XACT</i>       | rs1357977704 |
| Twin_A | X | 115465393 | T   | C  | Substitution | intergenic_variant      | -                 | -            |
| Twin_A | X | 119227169 | C   | CA | Insertion    | upstream_gene_variant   | <i>AC004835.2</i> | rs11420910   |
| Twin_A | X | 130938304 | T   | C  | Substitution | intergenic_variant      | -                 | -            |
| Twin_A | X | 142708225 | C   | A  | Substitution | intron_variant          | <i>AL031073.2</i> | -            |
| Twin_A | X | 144608023 | C   | T  | Substitution | intergenic_variant      | -                 | -            |
| Twin_A | Y | 12123479  | G   | GA | Insertion    | intron_variant          | <i>GYG2P1</i>     | rs113188804  |
| Twin_A | Y | 20863824  | C   | T  | Substitution | downstream_gene_variant | <i>GAPDHP17</i>   | -            |
| Twin_B | 1 | 1948293   | G   | A  | Substitution | intron_variant          | <i>CFAP74</i>     | -            |
| Twin_B | 1 | 5360980   | A   | G  | Substitution | intergenic_variant      | -                 | -            |
| Twin_B | 1 | 7752725   | A   | G  | Substitution | intron_variant          | <i>CAMTA1</i>     | rs1558304741 |
| Twin_B | 1 | 8034377   | T   | C  | Substitution | intron_variant          | <i>AL034417.2</i> | -            |
| Twin_B | 1 | 12823937  | C   | T  | Substitution | downstream_gene_variant | <i>PRAMEF11</i>   | -            |
| Twin_B | 1 | 16874999  | G   | T  | Substitution | downstream_gene_variant | <i>BX284668.2</i> | rs6586499    |
| Twin_B | 1 | 21195179  | C   | T  | Substitution | TF_binding_site_variant | <i>AL023574.1</i> | rs1040263005 |
| Twin_B | 1 | 28903853  | G   | GT | Insertion    | intron_variant          | <i>EPB41</i>      | rs776964978  |
| Twin_B | 1 | 30198944  | G   | A  | Substitution | intergenic_variant      | -                 | rs959100631  |
| Twin_B | 1 | 46567799  | T   | A  | Substitution | downstream_gene_variant | <i>MKNK1</i>      | -            |
| Twin_B | 1 | 46733432  | G   | A  | Substitution | intergenic_variant      | -                 | rs910046833  |
| Twin_B | 1 | 46925759  | G   | C  | Substitution | downstream_gene_variant | <i>CYP4A11</i>    | -            |
| Twin_B | 1 | 47112037  | C   | T  | Substitution | intron_variant          | <i>CYP4Z1</i>     | rs764020558  |
| Twin_B | 1 | 49651607  | C   | T  | Substitution | intron_variant          | <i>AGBLA</i>      | -            |
| Twin_B | 1 | 52446089  | C   | T  | Substitution | downstream_gene_variant | <i>TUT4</i>       | -            |
| Twin_B | 1 | 55508033  | CA  | C  | Deletion     | intron_variant          | <i>AL603840.1</i> | -            |
| Twin_B | 1 | 57203495  | C   | T  | Substitution | intron_variant          | <i>DAB1</i>       | -            |
| Twin_B | 1 | 68690432  | C   | T  | Substitution | intron_variant          | <i>AL033530.1</i> | rs1263200065 |
| Twin_B | 1 | 90494264  | G   | A  | Substitution | intergenic_variant      | -                 | -            |
| Twin_B | 1 | 104033383 | A   | G  | Substitution | intergenic_variant      | -                 | -            |
| Twin_B | 1 | 110190300 | G   | C  | Substitution | intron_variant          | <i>SLC6A17</i>    | -            |
| Twin_B | 1 | 110738023 | A   | G  | Substitution | intergenic_variant      | -                 | -            |
| Twin_B | 1 | 114307529 | G   | C  | Substitution | intergenic_variant      | -                 | -            |
| Twin_B | 1 | 115892616 | C   | T  | Substitution | intergenic_variant      | -                 | rs1302223823 |
| Twin_B | 1 | 143898748 | G   | A  | Substitution | downstream_gene_variant | <i>H3</i>         | -            |
| Twin_B | 1 | 147277076 | C   | A  | Substitution | downstream_gene_variant | <i>CHDIL</i>      | -            |
| Twin_B | 1 | 157062690 | T   | C  | Substitution | upstream_gene_variant   | <i>SMUIP1</i>     | -            |
| Twin_B | 1 | 158329018 | G   | A  | Substitution | splice_region_variant   | <i>CD1B</i>       | -            |
| Twin_B | 1 | 159742120 | G   | T  | Substitution | intergenic_variant      | -                 | -            |
| Twin_B | 1 | 165976313 | A   | G  | Substitution | intergenic_variant      | -                 | -            |
| Twin_B | 1 | 166242296 | C   | T  | Substitution | intron_variant          | <i>AL596087.2</i> | -            |

|        |   |           |    |     |              |                           |                   |              |
|--------|---|-----------|----|-----|--------------|---------------------------|-------------------|--------------|
| Twin_B | 1 | 166972081 | G  | A   | Substitution | intron_variant            | <i>ILDR2</i>      | rs747200728  |
| Twin_B | 1 | 170852137 | G  | C   | Substitution | intron_variant            | <i>BX284613.2</i> | -            |
| Twin_B | 1 | 175165067 | G  | T   | Substitution | intron_variant            | <i>KIAA0040</i>   | -            |
| Twin_B | 1 | 176214397 | G  | A   | Substitution | intron_variant            | <i>AL591043.2</i> | -            |
| Twin_B | 1 | 177128801 | C  | A   | Substitution | intron_variant            | <i>ASTN1</i>      | -            |
| Twin_B | 1 | 187326523 | G  | A   | Substitution | intron_variant            | <i>LINC01036</i>  | -            |
| Twin_B | 1 | 190010459 | C  | T   | Substitution | intergenic_variant        | -                 | rs574701171  |
| Twin_B | 1 | 192061801 | C  | A   | Substitution | intergenic_variant        | -                 | -            |
| Twin_B | 1 | 194370180 | G  | A   | Substitution | intergenic_variant        | -                 | rs568526830  |
| Twin_B | 1 | 194805882 | A  | T   | Substitution | intron_variant            | <i>AL353072.2</i> | rs529354380  |
| Twin_B | 1 | 197898293 | C  | A   | Substitution | upstream_gene_variant     | <i>C1orf53</i>    | -            |
| Twin_B | 1 | 211364253 | C  | T   | Substitution | downstream_gene_variant   | <i>TRAF5</i>      | -            |
| Twin_B | 1 | 213739818 | C  | T   | Substitution | intron_variant            | <i>AC096639.1</i> | rs751851426  |
| Twin_B | 1 | 216808720 | G  | A   | Substitution | intron_variant            | <i>ESRRG</i>      | -            |
| Twin_B | 1 | 226114304 | T  | TTA | Insertion    | intergenic_variant        | -                 | rs1263797763 |
| Twin_B | 1 | 228759153 | C  | T   | Substitution | intergenic_variant        | -                 | -            |
| Twin_B | 1 | 231661954 | G  | T   | Substitution | intron_variant            | <i>DISC1</i>      | -            |
| Twin_B | 1 | 237523679 | G  | A   | Substitution | intron_variant            | <i>RYR2</i>       | rs1165384474 |
| Twin_B | 1 | 239287292 | C  | T   | Substitution | intergenic_variant        | -                 | -            |
| Twin_B | 1 | 239790569 | T  | G   | Substitution | intron_variant            | <i>CHRM3</i>      | -            |
| Twin_B | 2 | 3059701   | C  | T   | Substitution | intron_variant            | <i>LINC01250</i>  | rs902349418  |
| Twin_B | 2 | 5809965   | G  | A   | Substitution | downstream_gene_variant   | <i>LINC01810</i>  | -            |
| Twin_B | 2 | 7937210   | A  | T   | Substitution | intron_variant            | <i>LINC00298</i>  | -            |
| Twin_B | 2 | 14870316  | G  | A   | Substitution | intron_variant            | <i>AC068286.2</i> | -            |
| Twin_B | 2 | 17702798  | C  | A   | Substitution | downstream_gene_variant   | <i>SMC6</i>       | rs956379181  |
| Twin_B | 2 | 17816780  | A  | G   | Substitution | missense_variant          | <i>MSGN1</i>      | -            |
| Twin_B | 2 | 21701231  | C  | T   | Substitution | intron_variant            | <i>AC018742.1</i> | -            |
| Twin_B | 2 | 22021980  | T  | C   | Substitution | intron_variant            | <i>AC096570.1</i> | -            |
| Twin_B | 2 | 22585137  | GT | G   | Deletion     | intergenic_variant        | -                 | -            |
| Twin_B | 2 | 22585139  | T  | A   | Substitution | intergenic_variant        | -                 | -            |
| Twin_B | 2 | 22619775  | C  | T   | Substitution | intergenic_variant        | -                 | rs540314768  |
| Twin_B | 2 | 22994571  | A  | G   | Substitution | intergenic_variant        | -                 | rs1455047191 |
| Twin_B | 2 | 24019295  | T  | C   | Substitution | downstream_gene_variant   | <i>MFS2B</i>      | -            |
| Twin_B | 2 | 27314362  | G  | A   | Substitution | downstream_gene_variant   | <i>MPV17</i>      | -            |
| Twin_B | 2 | 28287298  | T  | A   | Substitution | intron_variant            | <i>BABAM2</i>     | -            |
| Twin_B | 2 | 29298533  | A  | G   | Substitution | intron_variant            | <i>ALK</i>        | -            |
| Twin_B | 2 | 30708062  | G  | A   | Substitution | intergenic_variant        | -                 | rs1306752997 |
| Twin_B | 2 | 33204005  | TG | T   | Deletion     | intron_variant            | <i>LTBP1</i>      | -            |
| Twin_B | 2 | 34609950  | A  | G   | Substitution | intron_variant            | <i>LINC01320</i>  | -            |
| Twin_B | 2 | 35621513  | C  | T   | Substitution | intergenic_variant        | -                 | rs185192135  |
| Twin_B | 2 | 39543295  | C  | T   | Substitution | intron_variant            | <i>MAP4K3</i>     | -            |
| Twin_B | 2 | 41851787  | C  | T   | Substitution | regulatory_region_variant | -                 | -            |

|        |   |           |                                                  |     |              |                           |                   |              |
|--------|---|-----------|--------------------------------------------------|-----|--------------|---------------------------|-------------------|--------------|
| Twin_B | 2 | 52199227  | T                                                | C   | Substitution | intron_variant            | <i>AC007402.1</i> | -            |
| Twin_B | 2 | 55637956  | C                                                | T   | Substitution | intron_variant            | <i>PNPT1</i>      | rs931753562  |
| Twin_B | 2 | 55778474  | G                                                | A   | Substitution | intergenic_variant        | -                 | rs1269019834 |
| Twin_B | 2 | 59742006  | A                                                | T   | Substitution | intron_variant            | <i>AC007100.1</i> | -            |
| Twin_B | 2 | 65862748  | C                                                | T   | Substitution | intron_variant            | <i>AC007389.1</i> | -            |
| Twin_B | 2 | 67673061  | AGC                                              | A   | Deletion     | intron_variant            | <i>AC007422.1</i> | rs142178881  |
| Twin_B | 2 | 72017331  | C                                                | T   | Substitution | intergenic_variant        | -                 | -            |
| Twin_B | 2 | 76343534  | G                                                | A   | Substitution | intron_variant            | <i>AC073091.1</i> | -            |
| Twin_B | 2 | 77138659  | C                                                | T   | Substitution | intron_variant            | <i>LRRTM4</i>     | -            |
| Twin_B | 2 | 77305966  | T                                                | C   | Substitution | intron_variant            | <i>LRRTM4</i>     | rs1354282051 |
| Twin_B | 2 | 79741961  | T                                                | A   | Substitution | intron_variant            | <i>CTNNA2</i>     | -            |
| Twin_B | 2 | 84976628  | T                                                | A   | Substitution | intron_variant            | <i>KCMF1</i>      | rs1459851336 |
| Twin_B | 2 | 89011497  | G                                                | A   | Substitution | upstream_gene_variant     | <i>IGKV1</i>      | rs1327184549 |
| Twin_B | 2 | 92889972  | CAT                                              | C   | Deletion     | intergenic_variant        | -                 | rs1381310181 |
| Twin_B | 2 | 94087365  | T                                                | C   | Substitution | intergenic_variant        | -                 | rs1304472866 |
| Twin_B | 2 | 100572501 | T                                                | C   | Substitution | downstream_gene_variant   | <i>PDCL3</i>      | -            |
| Twin_B | 2 | 103642003 | G                                                | A   | Substitution | intergenic_variant        | -                 | -            |
| Twin_B | 2 | 104572208 | AC                                               | A   | Deletion     | intergenic_variant        | -                 | rs1234997111 |
| Twin_B | 2 | 110152812 | G                                                | A   | Substitution | intron_variant            | <i>NPHP1</i>      | -            |
| Twin_B | 2 | 112972342 | G                                                | A   | Substitution | regulatory_region_variant | -                 | -            |
| Twin_B | 2 | 113360949 | C                                                | G   | Substitution | intron_variant            | <i>AC016745.1</i> | -            |
| Twin_B | 2 | 114347202 | C                                                | G   | Substitution | intergenic_variant        | -                 | -            |
| Twin_B | 2 | 122468457 | C                                                | T   | Substitution | intron_variant            | <i>AC011246.1</i> | -            |
| Twin_B | 2 | 124707645 | G                                                | T   | Substitution | intron_variant            | <i>CNTNAP5</i>    | -            |
| Twin_B | 2 | 125662877 | G                                                | T   | Substitution | upstream_gene_variant     | <i>AC097499.2</i> | -            |
| Twin_B | 2 | 130970780 | G                                                | C   | Substitution | intron_variant            | <i>ARHGEF4</i>    | -            |
| Twin_B | 2 | 136809746 | AG                                               | A   | Deletion     | intron_variant            | <i>THSD7B</i>     | -            |
| Twin_B | 2 | 139199861 | C                                                | T   | Substitution | intergenic_variant        | -                 | rs9646664    |
| Twin_B | 2 | 139215973 | T                                                | A   | Substitution | intergenic_variant        | -                 | -            |
| Twin_B | 2 | 139897503 | C                                                | CTT | Insertion    | intergenic_variant        | -                 | -            |
| Twin_B | 2 | 140219327 | G                                                | T   | Substitution | downstream_gene_variant   | <i>MTND1P27</i>   | -            |
| Twin_B | 2 | 142622241 | G                                                | A   | Substitution | intergenic_variant        | -                 | -            |
| Twin_B | 2 | 147580489 | T                                                | C   | Substitution | intergenic_variant        | -                 | -            |
| Twin_B | 2 | 156625930 | G                                                | A   | Substitution | intergenic_variant        | -                 | rs919742480  |
| Twin_B | 2 | 156749565 | A                                                | G   | Substitution | intergenic_variant        | -                 | -            |
| Twin_B | 2 | 157345619 | GTTGGAAA<br>AGAAGCT<br>GCTGGGA<br>TCTACTTA<br>CC | G   | Deletion     | intergenic_variant        | -                 | -            |
| Twin_B | 2 | 158735231 | G                                                | A   | Substitution | intron_variant            | <i>AC005042.1</i> | -            |
| Twin_B | 2 | 166646939 | T                                                | TC  | Insertion    | intergenic_variant        | -                 | rs397801435  |
| Twin_B | 2 | 168435246 | A                                                | T   | Substitution | intergenic_variant        | -                 | rs13393085   |
| Twin_B | 2 | 181754253 | G                                                | A   | Substitution | intergenic_variant        | -                 | rs928244754  |
| Twin_B | 2 | 186809029 | C                                                | A   | Substitution | intergenic_variant        | -                 | -            |



|        |   |           |       |   |              |                           |                   |              |
|--------|---|-----------|-------|---|--------------|---------------------------|-------------------|--------------|
| Twin_B | 2 | 187978655 | C     | T | Substitution | intron_variant            | <i>LINC01090</i>  | -            |
| Twin_B | 2 | 190310023 | C     | T | Substitution | intron_variant            | <i>HIBCH</i>      | rs1380735746 |
| Twin_B | 2 | 191398351 | T     | G | Substitution | intron_variant            | <i>MYO1B</i>      | -            |
| Twin_B | 2 | 197588962 | G     | A | Substitution | intron_variant            | <i>RFTN2</i>      | -            |
| Twin_B | 2 | 202594928 | C     | T | Substitution | intergenic_variant        | -                 | rs987671953  |
| Twin_B | 2 | 202941148 | T     | C | Substitution | intron_variant            | <i>CARF</i>       | -            |
| Twin_B | 2 | 214886582 | T     | G | Substitution | intron_variant            | <i>SNHG31</i>     | -            |
| Twin_B | 2 | 215762883 | A     | C | Substitution | intron_variant            | <i>LINC00607</i>  | -            |
| Twin_B | 2 | 220248897 | TTCTC | T | Deletion     | intron_variant            | <i>AC019211.1</i> | -            |
| Twin_B | 2 | 222991555 | T     | C | Substitution | intergenic_variant        | -                 | -            |
| Twin_B | 2 | 226321782 | C     | T | Substitution | intergenic_variant        | -                 | -            |
| Twin_B | 2 | 228241318 | G     | A | Substitution | intergenic_variant        | -                 | rs746719263  |
| Twin_B | 2 | 236024598 | A     | G | Substitution | intron_variant            | <i>AGAP1</i>      | -            |
| Twin_B | 2 | 238340846 | T     | G | Substitution | intron_variant            | <i>TRAF3IP1</i>   | rs200969651  |
| Twin_B | 2 | 238788248 | G     | A | Substitution | downstream_gene_variant   | <i>AC145625.1</i> | -            |
| Twin_B | 3 | 4096954   | C     | T | Substitution | intron_variant            | <i>SUMF1</i>      | rs993902730  |
| Twin_B | 3 | 6268058   | G     | C | Substitution | intron_variant            | <i>AC026167.1</i> | -            |
| Twin_B | 3 | 8179865   | C     | T | Substitution | intron_variant            | <i>LMCD1</i>      | -            |
| Twin_B | 3 | 8330619   | T     | A | Substitution | intron_variant            | <i>LMCD1</i>      | -            |
| Twin_B | 3 | 8749340   | G     | C | Substitution | downstream_gene_variant   | <i>CAV3</i>       | -            |
| Twin_B | 3 | 8766880   | C     | G | Substitution | downstream_gene_variant   | <i>OXTR</i>       | -            |
| Twin_B | 3 | 8800977   | A     | G | Substitution | intron_variant            | <i>RAD18</i>      | -            |
| Twin_B | 3 | 9646697   | T     | A | Substitution | regulatory_region_variant | -                 | rs1001727401 |
| Twin_B | 3 | 39756857  | A     | T | Substitution | intergenic_variant        | -                 | rs950684554  |
| Twin_B | 3 | 50879771  | C     | G | Substitution | intron_variant            | <i>DOCK3</i>      | -            |
| Twin_B | 3 | 52975648  | C     | A | Substitution | intron_variant            | <i>SFMBT1</i>     | -            |
| Twin_B | 3 | 54092594  | G     | A | Substitution | intron_variant            | <i>AC115282.1</i> | -            |
| Twin_B | 3 | 57095586  | C     | T | Substitution | 3_prime_UTR_variant       | <i>IL17RD</i>     | rs1428340204 |
| Twin_B | 3 | 59401686  | C     | T | Substitution | intron_variant            | <i>AC126121.3</i> | -            |
| Twin_B | 3 | 62217141  | G     | T | Substitution | downstream_gene_variant   | <i>PTPRG</i>      | -            |
| Twin_B | 3 | 66880474  | C     | T | Substitution | intergenic_variant        | -                 | rs1357891267 |
| Twin_B | 3 | 74463202  | G     | A | Substitution | intron_variant            | <i>CNTN3</i>      | -            |
| Twin_B | 3 | 80315771  | G     | C | Substitution | intergenic_variant        | -                 | -            |
| Twin_B | 3 | 84248079  | T     | A | Substitution | intergenic_variant        | -                 | rs543628716  |
| Twin_B | 3 | 84322937  | C     | A | Substitution | intergenic_variant        | -                 | rs912367414  |
| Twin_B | 3 | 89748810  | A     | C | Substitution | intergenic_variant        | -                 | -            |
| Twin_B | 3 | 95223077  | C     | T | Substitution | intergenic_variant        | -                 | -            |
| Twin_B | 3 | 96820605  | G     | A | Substitution | intron_variant            | <i>EPHA6</i>      | -            |
| Twin_B | 3 | 99124717  | G     | C | Substitution | intergenic_variant        | -                 | rs868051607  |
| Twin_B | 3 | 101873401 | C     | A | Substitution | regulatory_region_variant | -                 | -            |
| Twin_B | 3 | 107880323 | C     | T | Substitution | intron_variant            | <i>LINC00635</i>  | -            |
| Twin_B | 3 | 111393544 | T     | G | Substitution | intron_variant            | <i>CD96</i>       | -            |

|        |   |           |    |   |              |                         |                   |              |
|--------|---|-----------|----|---|--------------|-------------------------|-------------------|--------------|
| Twin_B | 3 | 120551312 | G  | T | Substitution | intergenic_variant      | -                 | -            |
| Twin_B | 3 | 124318634 | C  | T | Substitution | intron_variant          | <i>KALRN</i>      | -            |
| Twin_B | 3 | 127184194 | T  | A | Substitution | intron_variant          | <i>AC112482.2</i> | -            |
| Twin_B | 3 | 145553273 | C  | T | Substitution | intergenic_variant      | -                 | rs181820859  |
| Twin_B | 3 | 146968300 | C  | A | Substitution | intron_variant          | <i>AC092957.1</i> | -            |
| Twin_B | 3 | 148123392 | C  | T | Substitution | intron_variant          | <i>AC092958.2</i> | rs893487280  |
| Twin_B | 3 | 150872501 | C  | T | Substitution | intron_variant          | <i>MINDY4B</i>    | -            |
| Twin_B | 3 | 152516100 | G  | A | Substitution | intergenic_variant      | -                 | -            |
| Twin_B | 3 | 157178549 | C  | G | Substitution | downstream_gene_variant | <i>AC092944.1</i> | -            |
| Twin_B | 3 | 169022850 | C  | A | Substitution | intron_variant          | <i>LINC01997</i>  | -            |
| Twin_B | 3 | 179003062 | C  | T | Substitution | intron_variant          | <i>ZMAT3</i>      | -            |
| Twin_B | 3 | 182077482 | T  | A | Substitution | intergenic_variant      | -                 | -            |
| Twin_B | 3 | 187366417 | G  | A | Substitution | upstream_gene_variant   | <i>RTP4</i>       | -            |
| Twin_B | 3 | 192580552 | T  | A | Substitution | intron_variant          | <i>FGF12</i>      | -            |
| Twin_B | 3 | 197965767 | A  | G | Substitution | intron_variant          | <i>LMLN</i>       | -            |
| Twin_B | 4 | 1811861   | C  | T | Substitution | 3_prime_UTR_variant     | <i>LETM1</i>      | -            |
| Twin_B | 4 | 6451943   | C  | A | Substitution | intron_variant          | <i>PPP2R2C</i>    | -            |
| Twin_B | 4 | 12745680  | C  | T | Substitution | intergenic_variant      | -                 | rs1006183911 |
| Twin_B | 4 | 16908350  | G  | T | Substitution | intergenic_variant      | -                 | rs750655685  |
| Twin_B | 4 | 26875683  | C  | G | Substitution | intron_variant          | <i>STM2</i>       | -            |
| Twin_B | 4 | 27652841  | G  | A | Substitution | intergenic_variant      | -                 | rs1037907678 |
| Twin_B | 4 | 33615886  | T  | A | Substitution | intron_variant          | <i>AC079772.1</i> | -            |
| Twin_B | 4 | 37418639  | A  | T | Substitution | intron_variant          | <i>NWD2</i>       | rs543621535  |
| Twin_B | 4 | 39429436  | G  | A | Substitution | intron_variant          | <i>KLB</i>        | -            |
| Twin_B | 4 | 46668719  | G  | C | Substitution | intergenic_variant      | -                 | -            |
| Twin_B | 4 | 47220483  | T  | C | Substitution | intron_variant          | <i>GABRB1</i>     | -            |
| Twin_B | 4 | 49731501  | T  | C | Substitution | intergenic_variant      | -                 | rs1458775311 |
| Twin_B | 4 | 52190355  | A  | G | Substitution | intergenic_variant      | -                 | -            |
| Twin_B | 4 | 57634212  | TG | T | Deletion     | intron_variant          | <i>AC093725.2</i> | -            |
| Twin_B | 4 | 57634214  | TG | T | Deletion     | intron_variant          | <i>AC093725.2</i> | -            |
| Twin_B | 4 | 60517882  | C  | T | Substitution | intergenic_variant      | -                 | -            |
| Twin_B | 4 | 64216296  | A  | G | Substitution | intergenic_variant      | -                 | rs562121918  |
| Twin_B | 4 | 64665477  | T  | A | Substitution | intergenic_variant      | -                 | -            |
| Twin_B | 4 | 67380380  | G  | A | Substitution | intergenic_variant      | -                 | rs551895523  |
| Twin_B | 4 | 70520668  | A  | T | Substitution | intron_variant          | <i>AMTN</i>       | -            |
| Twin_B | 4 | 71648848  | A  | G | Substitution | intergenic_variant      | -                 | rs1040824596 |
| Twin_B | 4 | 76047967  | G  | A | Substitution | intron_variant          | <i>ART3</i>       | -            |
| Twin_B | 4 | 86440642  | A  | G | Substitution | intron_variant          | <i>MAPK10</i>     | -            |
| Twin_B | 4 | 88387262  | T  | C | Substitution | upstream_gene_variant   | <i>HERC6</i>      | -            |
| Twin_B | 4 | 108394132 | G  | A | Substitution | intergenic_variant      | -                 | -            |
| Twin_B | 4 | 115259241 | A  | T | Substitution | intergenic_variant      | -                 | -            |
| Twin_B | 4 | 117969239 | T  | C | Substitution | intergenic_variant      | -                 | rs71627746   |

|        |   |           |     |   |              |                         |                   |              |
|--------|---|-----------|-----|---|--------------|-------------------------|-------------------|--------------|
| Twin_B | 4 | 119161162 | A   | C | Substitution | intron_variant          | <i>MYO22</i>      | -            |
| Twin_B | 4 | 120599980 | G   | A | Substitution | intergenic_variant      | -                 | -            |
| Twin_B | 4 | 125617334 | A   | T | Substitution | intergenic_variant      | -                 | -            |
| Twin_B | 4 | 126647636 | A   | G | Substitution | intron_variant          | <i>AC097528.1</i> | -            |
| Twin_B | 4 | 127771889 | A   | G | Substitution | intron_variant          | <i>SLC25A31</i>   | rs1201508233 |
| Twin_B | 4 | 140154007 | T   | G | Substitution | 5_prime_UTR_variant     | <i>MAML3</i>      | -            |
| Twin_B | 4 | 144879760 | C   | T | Substitution | downstream_gene_variant | <i>AC109811.1</i> | -            |
| Twin_B | 4 | 147616580 | G   | C | Substitution | intron_variant          | <i>AC093835.1</i> | -            |
| Twin_B | 4 | 152098840 | G   | A | Substitution | intron_variant          | <i>LINC02273</i>  | -            |
| Twin_B | 4 | 161716379 | T   | C | Substitution | intron_variant          | <i>FSTL5</i>      | -            |
| Twin_B | 4 | 166613505 | T   | C | Substitution | intergenic_variant      | -                 | -            |
| Twin_B | 4 | 168686621 | G   | A | Substitution | intron_variant          | <i>PALLD</i>      | rs1030969924 |
| Twin_B | 4 | 174170616 | G   | A | Substitution | intron_variant          | <i>LINC02268</i>  | rs1241611683 |
| Twin_B | 4 | 179639868 | C   | T | Substitution | intergenic_variant      | -                 | -            |
| Twin_B | 4 | 180135661 | C   | A | Substitution | intergenic_variant      | -                 | -            |
| Twin_B | 4 | 184638048 | T   | C | Substitution | intron_variant          | <i>CASP3</i>      | -            |
| Twin_B | 4 | 187716917 | C   | T | Substitution | downstream_gene_variant | <i>AC097521.1</i> | rs1306869395 |
| Twin_B | 5 | 4311163   | C   | T | Substitution | intergenic_variant      | -                 | rs755225209  |
| Twin_B | 5 | 4490226   | G   | A | Substitution | intron_variant          | <i>AC106799.2</i> | -            |
| Twin_B | 5 | 5721155   | C   | A | Substitution | intergenic_variant      | -                 | rs1404060316 |
| Twin_B | 5 | 7425190   | G   | A | Substitution | intron_variant          | <i>ADCY2</i>      | -            |
| Twin_B | 5 | 9500811   | T   | C | Substitution | intron_variant          | <i>SEMA5A</i>     | -            |
| Twin_B | 5 | 11361065  | G   | A | Substitution | downstream_gene_variant | <i>CTNND2</i>     | -            |
| Twin_B | 5 | 18474168  | C   | T | Substitution | intergenic_variant      | -                 | -            |
| Twin_B | 5 | 19703201  | C   | T | Substitution | intron_variant          | <i>CDH18</i>      | -            |
| Twin_B | 5 | 29927998  | G   | A | Substitution | intergenic_variant      | -                 | rs910971117  |
| Twin_B | 5 | 30228903  | G   | A | Substitution | intergenic_variant      | -                 | -            |
| Twin_B | 5 | 32183802  | G   | A | Substitution | intergenic_variant      | -                 | rs1321151704 |
| Twin_B | 5 | 35163531  | G   | A | Substitution | intron_variant          | <i>PRLR</i>       | -            |
| Twin_B | 5 | 41232152  | T   | G | Substitution | intron_variant          | <i>C6</i>         | -            |
| Twin_B | 5 | 41663190  | G   | A | Substitution | intergenic_variant      | -                 | -            |
| Twin_B | 5 | 42222760  | G   | A | Substitution | intergenic_variant      | -                 | -            |
| Twin_B | 5 | 45194560  | C   | T | Substitution | intergenic_variant      | -                 | rs550304760  |
| Twin_B | 5 | 47101412  | G   | A | Substitution | intergenic_variant      | -                 | rs1255895881 |
| Twin_B | 5 | 50007872  | T   | C | Substitution | intergenic_variant      | -                 | -            |
| Twin_B | 5 | 53160317  | A   | G | Substitution | intergenic_variant      | -                 | -            |
| Twin_B | 5 | 59291742  | T   | G | Substitution | intron_variant          | <i>PDE4D</i>      | rs57801368   |
| Twin_B | 5 | 63614795  | GAC | G | Deletion     | intergenic_variant      | -                 | rs1396639575 |
| Twin_B | 5 | 72404389  | A   | G | Substitution | intergenic_variant      | -                 | -            |
| Twin_B | 5 | 84595108  | T   | C | Substitution | intergenic_variant      | -                 | rs1003756160 |
| Twin_B | 5 | 85129366  | T   | C | Substitution | intergenic_variant      | -                 | -            |
| Twin_B | 5 | 93483038  | G   | A | Substitution | intron_variant          | <i>NR2F1</i>      | rs918359530  |

|        |   |           |    |   |              |                           |                   |              |
|--------|---|-----------|----|---|--------------|---------------------------|-------------------|--------------|
| Twin_B | 5 | 105561137 | C  | T | Substitution | intergenic_variant        | -                 | -            |
| Twin_B | 5 | 106685060 | G  | A | Substitution | intergenic_variant        | -                 | -            |
| Twin_B | 5 | 110479443 | C  | T | Substitution | intron_variant            | <i>TMEM232</i>    | -            |
| Twin_B | 5 | 119572129 | C  | T | Substitution | intron_variant            | <i>HSD17B4</i>    | -            |
| Twin_B | 5 | 122619069 | G  | A | Substitution | intergenic_variant        | -                 | -            |
| Twin_B | 5 | 130265666 | C  | T | Substitution | intergenic_variant        | -                 | rs62391477   |
| Twin_B | 5 | 134868896 | C  | T | Substitution | intergenic_variant        | -                 | rs910097048  |
| Twin_B | 5 | 137416371 | G  | C | Substitution | intron_variant            | <i>SPOCK1</i>     | -            |
| Twin_B | 5 | 140836906 | A  | G | Substitution | 3_prime_UTR_variant       | <i>PCDHA7</i>     | -            |
| Twin_B | 5 | 147046232 | G  | T | Substitution | intron_variant            | <i>PPP2R2B</i>    | -            |
| Twin_B | 5 | 155317926 | G  | T | Substitution | intergenic_variant        | -                 | -            |
| Twin_B | 5 | 157005759 | C  | A | Substitution | intergenic_variant        | -                 | -            |
| Twin_B | 5 | 158293742 | G  | A | Substitution | intergenic_variant        | -                 | -            |
| Twin_B | 5 | 159980907 | T  | C | Substitution | intergenic_variant        | -                 | -            |
| Twin_B | 5 | 161395724 | G  | A | Substitution | intron_variant            | <i>GABRB2</i>     | -            |
| Twin_B | 5 | 161830310 | G  | T | Substitution | intergenic_variant        | -                 | -            |
| Twin_B | 5 | 166256348 | G  | A | Substitution | intergenic_variant        | -                 | -            |
| Twin_B | 5 | 175182485 | G  | A | Substitution | intergenic_variant        | -                 | -            |
| Twin_B | 5 | 178484296 | T  | G | Substitution | intron_variant            | <i>COL23A1</i>    | -            |
| Twin_B | 6 | 1850433   | CT | C | Deletion     | intron_variant            | <i>GMDS</i>       | -            |
| Twin_B | 6 | 18553216  | G  | T | Substitution | intron_variant            | <i>MIR548A1HG</i> | -            |
| Twin_B | 6 | 20182475  | T  | G | Substitution | intron_variant            | <i>MBOAT1</i>     | -            |
| Twin_B | 6 | 23725753  | C  | T | Substitution | intergenic_variant        | -                 | -            |
| Twin_B | 6 | 23820823  | AG | A | Deletion     | intergenic_variant        | -                 | -            |
| Twin_B | 6 | 32530993  | T  | C | Substitution | regulatory_region_variant | -                 | rs74714255   |
| Twin_B | 6 | 33355096  | C  | T | Substitution | intergenic_variant        | -                 | -            |
| Twin_B | 6 | 40322738  | T  | C | Substitution | intergenic_variant        | -                 | -            |
| Twin_B | 6 | 45795560  | T  | G | Substitution | intergenic_variant        | -                 | -            |
| Twin_B | 6 | 49245413  | G  | A | Substitution | intergenic_variant        | -                 | -            |
| Twin_B | 6 | 49866189  | C  | T | Substitution | intron_variant            | <i>CRISP1</i>     | -            |
| Twin_B | 6 | 50314470  | C  | T | Substitution | intergenic_variant        | -                 | rs192304872  |
| Twin_B | 6 | 68164502  | G  | A | Substitution | intergenic_variant        | -                 | rs539171573  |
| Twin_B | 6 | 73054903  | C  | A | Substitution | intron_variant            | <i>KCNQ5</i>      | -            |
| Twin_B | 6 | 77608472  | C  | G | Substitution | intergenic_variant        | -                 | rs145374562  |
| Twin_B | 6 | 78332113  | A  | G | Substitution | intergenic_variant        | -                 | -            |
| Twin_B | 6 | 80558206  | T  | C | Substitution | upstream_gene_variant     | <i>AL590824.1</i> | -            |
| Twin_B | 6 | 95406340  | C  | T | Substitution | intergenic_variant        | -                 | rs548629996  |
| Twin_B | 6 | 101437584 | G  | A | Substitution | intron_variant            | <i>GRIK2</i>      | rs1368442237 |
| Twin_B | 6 | 102787939 | T  | A | Substitution | intergenic_variant        | -                 | -            |
| Twin_B | 6 | 105574693 | A  | C | Substitution | intron_variant            | <i>AL096794.1</i> | -            |
| Twin_B | 6 | 110560428 | G  | A | Substitution | downstream_gene_variant   | <i>AL512430.3</i> | -            |
| Twin_B | 6 | 115939145 | A  | G | Substitution | 3_prime_UTR_variant       | <i>FRK</i>        | -            |

|        |   |           |     |   |              |                         |                   |              |
|--------|---|-----------|-----|---|--------------|-------------------------|-------------------|--------------|
| Twin_B | 6 | 132482937 | C   | T | Substitution | intron_variant          | <i>STX7</i>       | -            |
| Twin_B | 6 | 133738256 | C   | A | Substitution | intron_variant          | <i>TARID</i>      | -            |
| Twin_B | 6 | 153868755 | C   | A | Substitution | intergenic_variant      | -                 | -            |
| Twin_B | 6 | 155942473 | C   | T | Substitution | intron_variant          | <i>AL589693.1</i> | rs1029874863 |
| Twin_B | 6 | 157796066 | T   | G | Substitution | intron_variant          | <i>SNX9</i>       | -            |
| Twin_B | 6 | 160228462 | G   | T | Substitution | intron_variant          | <i>SLC22A2</i>    | -            |
| Twin_B | 6 | 160512492 | C   | T | Substitution | intron_variant          | <i>LPAL2</i>      | rs573849624  |
| Twin_B | 6 | 163903570 | G   | A | Substitution | intergenic_variant      | -                 | rs138646256  |
| Twin_B | 6 | 164337205 | G   | A | Substitution | intergenic_variant      | -                 | rs1395517073 |
| Twin_B | 6 | 170147589 | C   | A | Substitution | downstream_gene_variant | <i>AL596442.4</i> | -            |
| Twin_B | 7 | 4358841   | C   | T | Substitution | intergenic_variant      | -                 | rs746784235  |
| Twin_B | 7 | 7383076   | A   | T | Substitution | intron_variant          | <i>COL28A1</i>    | -            |
| Twin_B | 7 | 9012014   | G   | A | Substitution | intergenic_variant      | -                 | -            |
| Twin_B | 7 | 10181486  | C   | T | Substitution | intergenic_variant      | -                 | -            |
| Twin_B | 7 | 20905885  | C   | G | Substitution | intron_variant          | <i>LINC01162</i>  | -            |
| Twin_B | 7 | 26002719  | G   | A | Substitution | intergenic_variant      | -                 | -            |
| Twin_B | 7 | 27125974  | G   | A | Substitution | downstream_gene_variant | <i>AC004080.6</i> | -            |
| Twin_B | 7 | 30124532  | G   | T | Substitution | downstream_gene_variant | <i>AC007036.5</i> | -            |
| Twin_B | 7 | 33443171  | A   | T | Substitution | intron_variant          | <i>BBS9</i>       | -            |
| Twin_B | 7 | 33920177  | G   | A | Substitution | intron_variant          | <i>BMPER</i>      | -            |
| Twin_B | 7 | 34052098  | C   | T | Substitution | intron_variant          | <i>BMPER</i>      | -            |
| Twin_B | 7 | 43433707  | A   | C | Substitution | intron_variant          | <i>HECW1</i>      | -            |
| Twin_B | 7 | 44053423  | G   | A | Substitution | downstream_gene_variant | <i>DBNL</i>       | rs1254859423 |
| Twin_B | 7 | 45053757  | A   | G | Substitution | intron_variant          | <i>CCM2</i>       | -            |
| Twin_B | 7 | 45393430  | C   | G | Substitution | upstream_gene_variant   | <i>ELK1P1</i>     | -            |
| Twin_B | 7 | 48916465  | T   | C | Substitution | upstream_gene_variant   | <i>CDC14C</i>     | rs1245635730 |
| Twin_B | 7 | 54587046  | C   | A | Substitution | intergenic_variant      | -                 | -            |
| Twin_B | 7 | 57036330  | G   | A | Substitution | intergenic_variant      | -                 | rs368641980  |
| Twin_B | 7 | 60485855  | A   | C | Substitution | intergenic_variant      | -                 | rs1335884497 |
| Twin_B | 7 | 60938781  | CA  | C | Deletion     | intergenic_variant      | -                 | rs1250869720 |
| Twin_B | 7 | 61436516  | T   | A | Substitution | intergenic_variant      | -                 | rs1169588355 |
| Twin_B | 7 | 61970818  | T   | C | Substitution | intergenic_variant      | -                 | rs1283251044 |
| Twin_B | 7 | 62882059  | A   | C | Substitution | intergenic_variant      | -                 | rs112905112  |
| Twin_B | 7 | 62882071  | C   | A | Substitution | intergenic_variant      | -                 | rs1395947656 |
| Twin_B | 7 | 65034946  | G   | A | Substitution | upstream_gene_variant   | <i>AC073210.2</i> | rs954732530  |
| Twin_B | 7 | 65590326  | T   | C | Substitution | intergenic_variant      | -                 | -            |
| Twin_B | 7 | 67521209  | C   | T | Substitution | intergenic_variant      | -                 | rs183903994  |
| Twin_B | 7 | 71219697  | C   | T | Substitution | intron_variant          | <i>GALNT17</i>    | -            |
| Twin_B | 7 | 71503989  | G   | A | Substitution | intron_variant          | <i>GALNT17</i>    | -            |
| Twin_B | 7 | 73980208  | CAA | C | Deletion     | intergenic_variant      | -                 | rs60681274   |
| Twin_B | 7 | 75784737  | G   | A | Substitution | intron_variant          | <i>CCL26</i>      | -            |
| Twin_B | 7 | 86130259  | T   | G | Substitution | intergenic_variant      | -                 | -            |

|        |   |           |        |     |              |                           |                   |              |
|--------|---|-----------|--------|-----|--------------|---------------------------|-------------------|--------------|
| Twin_B | 7 | 102788991 | TATG   | T   | Deletion     | downstream_gene_variant   | <i>FAM185A</i>    | rs1163997473 |
| Twin_B | 7 | 108865841 | G      | A   | Substitution | intergenic_variant        | -                 | -            |
| Twin_B | 7 | 111235913 | G      | A   | Substitution | intron_variant            | <i>IMMP2L</i>     | -            |
| Twin_B | 7 | 116155279 | G      | C   | Substitution | intron_variant            | <i>TFEC</i>       | -            |
| Twin_B | 7 | 134178896 | G      | A   | Substitution | intron_variant            | <i>LRGUK</i>      | -            |
| Twin_B | 7 | 137739877 | G      | T   | Substitution | intron_variant            | <i>DGKI</i>       | rs190071670  |
| Twin_B | 7 | 142637901 | C      | A   | Substitution | downstream_gene_variant   | <i>TRBV21</i>     | -            |
| Twin_B | 7 | 146668441 | T      | TGG | Insertion    | intron_variant            | <i>CNTNAP2</i>    | rs35693921   |
| Twin_B | 7 | 150085019 | G      | A   | Substitution | intergenic_variant        | -                 | rs1461424202 |
| Twin_B | 7 | 152410761 | T      | C   | Substitution | intron_variant            | <i>KMT2C</i>      | rs80138121   |
| Twin_B | 7 | 156931430 | C      | T   | Substitution | intergenic_variant        | -                 | -            |
| Twin_B | 8 | 924933    | C      | T   | Substitution | intron_variant            | <i>DLGAP2</i>     | -            |
| Twin_B | 8 | 3391860   | G      | T   | Substitution | intron_variant            | <i>CSMD1</i>      | -            |
| Twin_B | 8 | 4997791   | G      | A   | Substitution | regulatory_region_variant | -                 | -            |
| Twin_B | 8 | 5826762   | C      | T   | Substitution | intergenic_variant        | -                 | -            |
| Twin_B | 8 | 19798556  | G      | T   | Substitution | intergenic_variant        | -                 | -            |
| Twin_B | 8 | 20863668  | T      | A   | Substitution | intergenic_variant        | -                 | -            |
| Twin_B | 8 | 25151260  | C      | A   | Substitution | intergenic_variant        | -                 | -            |
| Twin_B | 8 | 26940513  | G      | A   | Substitution | intergenic_variant        | -                 | -            |
| Twin_B | 8 | 32400294  | G      | T   | Substitution | intron_variant            | <i>NRG1</i>       | -            |
| Twin_B | 8 | 32524703  | G      | A   | Substitution | intron_variant            | <i>NRG1</i>       | -            |
| Twin_B | 8 | 34194743  | G      | C   | Substitution | intron_variant            | <i>AC087855.2</i> | -            |
| Twin_B | 8 | 41188472  | A      | T   | Substitution | intergenic_variant        | -                 | -            |
| Twin_B | 8 | 43877252  | G      | GT  | Insertion    | intergenic_variant        | -                 | -            |
| Twin_B | 8 | 44701946  | T      | G   | Substitution | intergenic_variant        | -                 | rs1325351437 |
| Twin_B | 8 | 46315152  | G      | A   | Substitution | intergenic_variant        | -                 | -            |
| Twin_B | 8 | 49102414  | A      | C   | Substitution | intron_variant            | <i>AC044893.1</i> | -            |
| Twin_B | 8 | 50264084  | A      | G   | Substitution | intron_variant            | <i>SNTG1</i>      | -            |
| Twin_B | 8 | 51178687  | G      | A   | Substitution | intergenic_variant        | -                 | rs1207366775 |
| Twin_B | 8 | 53427578  | TAC    | T   | Deletion     | intron_variant            | <i>AC022034.3</i> | -            |
| Twin_B | 8 | 57557945  | G      | A   | Substitution | intron_variant            | <i>AC090796.1</i> | -            |
| Twin_B | 8 | 58506466  | G      | T   | Substitution | downstream_gene_variant   | <i>PPIAP85</i>    | rs973571307  |
| Twin_B | 8 | 59792693  | T      | A   | Substitution | intergenic_variant        | -                 | -            |
| Twin_B | 8 | 64469993  | C      | A   | Substitution | intergenic_variant        | -                 | -            |
| Twin_B | 8 | 69896186  | C      | A   | Substitution | intergenic_variant        | -                 | rs1204844083 |
| Twin_B | 8 | 70358021  | AGCCTG | A   | Deletion     | downstream_gene_variant   | <i>RNY3P14</i>    | -            |
| Twin_B | 8 | 71477385  | T      | C   | Substitution | intron_variant            | <i>EYA1</i>       | -            |
| Twin_B | 8 | 78483436  | T      | C   | Substitution | intron_variant            | <i>PKIA</i>       | -            |
| Twin_B | 8 | 81785469  | A      | G   | Substitution | intergenic_variant        | -                 | rs1439987215 |
| Twin_B | 8 | 82359769  | T      | C   | Substitution | intron_variant            | <i>AC060765.2</i> | -            |
| Twin_B | 8 | 84130068  | C      | T   | Substitution | intron_variant            | <i>AC015522.1</i> | rs114417960  |
| Twin_B | 8 | 87159687  | A      | T   | Substitution | intron_variant            | <i>CNBD1</i>      | -            |

|        |   |           |       |   |              |                         |                   |              |
|--------|---|-----------|-------|---|--------------|-------------------------|-------------------|--------------|
| Twin_B | 8 | 87159688  | G     | A | Substitution | intron_variant          | <i>CNBD1</i>      | -            |
| Twin_B | 8 | 98496864  | T     | C | Substitution | intron_variant          | <i>STK3</i>       | rs1015493993 |
| Twin_B | 8 | 98657310  | C     | T | Substitution | intron_variant          | <i>STK3</i>       | -            |
| Twin_B | 8 | 100119116 | G     | A | Substitution | intron_variant          | <i>RGS22</i>      | -            |
| Twin_B | 8 | 109438926 | A     | G | Substitution | missense_variant        | <i>PKHD1L1</i>    | -            |
| Twin_B | 8 | 109534244 | C     | T | Substitution | 3_prime_UTR_variant     | <i>PKHD1L1</i>    | rs539684370  |
| Twin_B | 8 | 111647834 | G     | C | Substitution | intron_variant          | <i>LINC02237</i>  | -            |
| Twin_B | 8 | 111905799 | G     | A | Substitution | intergenic_variant      | -                 | rs1453724199 |
| Twin_B | 8 | 113516282 | C     | A | Substitution | intergenic_variant      | -                 | -            |
| Twin_B | 8 | 114563854 | C     | T | Substitution | intergenic_variant      | -                 | -            |
| Twin_B | 8 | 116551195 | C     | T | Substitution | intergenic_variant      | -                 | -            |
| Twin_B | 8 | 122234933 | G     | A | Substitution | intergenic_variant      | -                 | rs1423584842 |
| Twin_B | 8 | 126381321 | C     | T | Substitution | intergenic_variant      | -                 | rs1433139292 |
| Twin_B | 8 | 131552936 | T     | A | Substitution | intergenic_variant      | -                 | -            |
| Twin_B | 8 | 133562727 | G     | A | Substitution | downstream_gene_variant | <i>ST3GALI</i>    | -            |
| Twin_B | 8 | 136497219 | A     | G | Substitution | intron_variant          | <i>LINC02055</i>  | -            |
| Twin_B | 8 | 139066773 | G     | A | Substitution | intergenic_variant      | -                 | -            |
| Twin_B | 9 | 595757    | G     | A | Substitution | intron_variant          | <i>KANK1</i>      | rs1028227944 |
| Twin_B | 9 | 5583708   | G     | A | Substitution | intron_variant          | <i>AL162253.2</i> | -            |
| Twin_B | 9 | 9208774   | T     | C | Substitution | intron_variant          | <i>PTPRD</i>      | -            |
| Twin_B | 9 | 10229559  | G     | A | Substitution | intron_variant          | <i>PTPRD</i>      | -            |
| Twin_B | 9 | 12626664  | C     | T | Substitution | intergenic_variant      | -                 | -            |
| Twin_B | 9 | 12964481  | A     | T | Substitution | intron_variant          | <i>AL161449.2</i> | rs1563767337 |
| Twin_B | 9 | 21096138  | A     | G | Substitution | intergenic_variant      | -                 | rs896126975  |
| Twin_B | 9 | 23036773  | C     | T | Substitution | intron_variant          | <i>AL391117.1</i> | -            |
| Twin_B | 9 | 24723875  | G     | T | Substitution | intergenic_variant      | -                 | -            |
| Twin_B | 9 | 24924904  | G     | A | Substitution | intergenic_variant      | -                 | rs193241464  |
| Twin_B | 9 | 38292964  | C     | T | Substitution | intergenic_variant      | -                 | -            |
| Twin_B | 9 | 38995507  | T     | C | Substitution | intron_variant          | <i>AL953883.1</i> | rs1422022710 |
| Twin_B | 9 | 42290039  | T     | A | Substitution | intron_variant          | <i>ALA45584.2</i> | rs1211321020 |
| Twin_B | 9 | 42760705  | C     | T | Substitution | intron_variant          | <i>BX664718.2</i> | rs56025544   |
| Twin_B | 9 | 42945900  | G     | A | Substitution | intron_variant          | <i>ANKRD20A7P</i> | -            |
| Twin_B | 9 | 65672213  | T     | C | Substitution | intron_variant          | <i>CBWD5</i>      | rs796503817  |
| Twin_B | 9 | 66779265  | C     | T | Substitution | intergenic_variant      | -                 | rs1271105675 |
| Twin_B | 9 | 67205531  | TG    | T | Deletion     | intron_variant          | <i>AL162233.1</i> | rs368975415  |
| Twin_B | 9 | 73452437  | GTTTC | G | Deletion     | intergenic_variant      | -                 | -            |
| Twin_B | 9 | 74317541  | T     | C | Substitution | intergenic_variant      | -                 | -            |
| Twin_B | 9 | 77105186  | C     | T | Substitution | intergenic_variant      | -                 | rs538603299  |
| Twin_B | 9 | 87267784  | G     | A | Substitution | intergenic_variant      | -                 | rs1328259639 |
| Twin_B | 9 | 88848472  | C     | A | Substitution | intergenic_variant      | -                 | -            |
| Twin_B | 9 | 95722226  | G     | T | Substitution | intergenic_variant      | -                 | -            |
| Twin_B | 9 | 98676266  | A     | T | Substitution | intron_variant          | <i>GABBR2</i>     | -            |

|        |    |           |    |   |              |                                    |                   |              |
|--------|----|-----------|----|---|--------------|------------------------------------|-------------------|--------------|
| Twin_B | 9  | 102339974 | A  | G | Substitution | intergenic_variant                 | -                 | -            |
| Twin_B | 9  | 102993672 | C  | A | Substitution | upstream_gene_variant              | <i>CYLC2</i>      | -            |
| Twin_B | 9  | 103368304 | G  | A | Substitution | intron_variant                     | <i>AL390962.1</i> | -            |
| Twin_B | 9  | 104257777 | G  | T | Substitution | intergenic_variant                 | -                 | -            |
| Twin_B | 9  | 104331598 | T  | G | Substitution | upstream_gene_variant              | <i>AL512646.1</i> | -            |
| Twin_B | 9  | 105298502 | A  | G | Substitution | intron_variant                     | <i>SLC44A1</i>    | -            |
| Twin_B | 9  | 118261593 | G  | A | Substitution | intergenic_variant                 | -                 | rs1353495123 |
| Twin_B | 9  | 124851965 | C  | T | Substitution | upstream_gene_variant              | <i>WDR38</i>      | rs962035631  |
| Twin_B | 9  | 127439569 | C  | T | Substitution | intron_variant                     | <i>ZNF79</i>      | -            |
| Twin_B | 9  | 130429019 | C  | T | Substitution | intron_variant                     | <i>HMCN2</i>      | rs554518691  |
| Twin_B | 9  | 131860557 | T  | A | Substitution | missense_variant                   | <i>MED27</i>      | -            |
| Twin_B | 9  | 134007274 | C  | T | Substitution | intergenic_variant                 | -                 | -            |
| Twin_B | 9  | 135090386 | T  | G | Substitution | intron_variant                     | <i>OLFM1</i>      | rs56337838   |
| Twin_B | 10 | 1176537   | C  | T | Substitution | downstream_gene_variant            | <i>ADARB2</i>     | rs757910551  |
| Twin_B | 10 | 9492286   | A  | C | Substitution | intergenic_variant                 | -                 | rs148903298  |
| Twin_B | 10 | 10933457  | T  | A | Substitution | downstream_gene_variant            | <i>LINC00710</i>  | -            |
| Twin_B | 10 | 12067169  | A  | G | Substitution | upstream_gene_variant              | <i>DHTRD1</i>     | rs1055077923 |
| Twin_B | 10 | 14501740  | C  | A | Substitution | intergenic_variant                 | -                 | -            |
| Twin_B | 10 | 19776842  | A  | T | Substitution | intron_variant                     | <i>MALRD1</i>     | -            |
| Twin_B | 10 | 24984824  | G  | A | Substitution | missense_variant                   | <i>ENKUR</i>      | rs200773323  |
| Twin_B | 10 | 30158617  | C  | A | Substitution | intergenic_variant                 | -                 | -            |
| Twin_B | 10 | 33849532  | T  | C | Substitution | intergenic_variant                 | -                 | -            |
| Twin_B | 10 | 37826153  | C  | T | Substitution | downstream_gene_variant            | <i>ZNF248</i>     | -            |
| Twin_B | 10 | 42358812  | A  | G | Substitution | intron_variant                     | <i>BX322639.1</i> | -            |
| Twin_B | 10 | 46311814  | C  | A | Substitution | downstream_gene_variant            | <i>ANTXRL</i>     | -            |
| Twin_B | 10 | 54568022  | G  | T | Substitution | intron_variant                     | <i>PCDH15</i>     | -            |
| Twin_B | 10 | 65525504  | T  | C | Substitution | intergenic_variant                 | -                 | -            |
| Twin_B | 10 | 73104873  | G  | A | Substitution | upstream_gene_variant              | <i>AL731563.3</i> | -            |
| Twin_B | 10 | 75129152  | A  | T | Substitution | downstream_gene_variant            | <i>RPS26P42</i>   | rs1477868012 |
| Twin_B | 10 | 82739562  | G  | A | Substitution | intron_variant                     | <i>NRG3</i>       | -            |
| Twin_B | 10 | 86750662  | C  | A | Substitution | non_coding_transcript_exon_variant | <i>AC067750.1</i> | -            |
| Twin_B | 10 | 88654107  | TA | T | Deletion     | intergenic_variant                 | -                 | rs200426640  |
| Twin_B | 10 | 90700494  | C  | T | Substitution | intergenic_variant                 | -                 | -            |
| Twin_B | 10 | 92770872  | T  | A | Substitution | intergenic_variant                 | -                 | -            |
| Twin_B | 10 | 93234495  | G  | T | Substitution | intergenic_variant                 | -                 | rs184258432  |
| Twin_B | 10 | 102661031 | C  | T | Substitution | downstream_gene_variant            | <i>TRIM8</i>      | -            |
| Twin_B | 10 | 103273122 | G  | A | Substitution | TF_binding_site_variant            | <i>INA</i>        | rs1286474689 |
| Twin_B | 10 | 110609195 | T  | A | Substitution | downstream_gene_variant            | <i>SMC3</i>       | -            |
| Twin_B | 10 | 115355253 | A  | G | Substitution | intron_variant                     | <i>ATRNL1</i>     | -            |
| Twin_B | 10 | 116513252 | G  | A | Substitution | intergenic_variant                 | -                 | -            |
| Twin_B | 10 | 118845653 | C  | T | Substitution | intron_variant                     | <i>AL157388.1</i> | -            |
| Twin_B | 10 | 121236516 | G  | A | Substitution | intergenic_variant                 | -                 | rs75201857   |



|        |    |           |    |   |              |                           |                   |              |
|--------|----|-----------|----|---|--------------|---------------------------|-------------------|--------------|
| Twin_B | 10 | 125904313 | C  | T | Substitution | intron_variant            | <i>FANK1</i>      | rs571397776  |
| Twin_B | 10 | 131096200 | G  | A | Substitution | downstream_gene_variant   | <i>TCERG1L</i>    | -            |
| Twin_B | 10 | 132055519 | G  | A | Substitution | intron_variant            | <i>JAKMIP3</i>    | rs11813033   |
| Twin_B | 11 | 2172588   | G  | A | Substitution | upstream_gene_variant     | <i>MIR4686</i>    | rs970284747  |
| Twin_B | 11 | 4222159   | G  | A | Substitution | intergenic_variant        | -                 | rs78524524   |
| Twin_B | 11 | 4861410   | G  | A | Substitution | intron_variant            | <i>MMP26</i>      | -            |
| Twin_B | 11 | 5952018   | A  | G | Substitution | downstream_gene_variant   | <i>OR56A3</i>     | -            |
| Twin_B | 11 | 8836985   | G  | A | Substitution | intron_variant            | <i>DENND2B</i>    | -            |
| Twin_B | 11 | 11456484  | C  | T | Substitution | intron_variant            | <i>GALNT18</i>    | -            |
| Twin_B | 11 | 19063121  | G  | A | Substitution | upstream_gene_variant     | <i>MRGPRX2</i>    | -            |
| Twin_B | 11 | 20315541  | A  | G | Substitution | intergenic_variant        | -                 | -            |
| Twin_B | 11 | 20325176  | G  | T | Substitution | intergenic_variant        | -                 | -            |
| Twin_B | 11 | 36738318  | A  | G | Substitution | intergenic_variant        | -                 | rs1297968115 |
| Twin_B | 11 | 36973840  | G  | A | Substitution | intergenic_variant        | -                 | rs983687999  |
| Twin_B | 11 | 42300900  | G  | A | Substitution | intergenic_variant        | -                 | rs915445215  |
| Twin_B | 11 | 42391773  | A  | G | Substitution | intergenic_variant        | -                 | -            |
| Twin_B | 11 | 44879657  | AG | A | Deletion     | intron_variant            | <i>TSPAN18</i>    | -            |
| Twin_B | 11 | 54940328  | C  | A | Substitution | intergenic_variant        | -                 | -            |
| Twin_B | 11 | 55783372  | G  | A | Substitution | upstream_gene_variant     | <i>OR5D15P</i>    | rs566667825  |
| Twin_B | 11 | 81625515  | T  | C | Substitution | intergenic_variant        | -                 | rs1018593916 |
| Twin_B | 11 | 82290505  | C  | T | Substitution | intron_variant            | <i>MIR4300HG</i>  | rs181088482  |
| Twin_B | 11 | 82375060  | A  | T | Substitution | intron_variant            | <i>MIR4300HG</i>  | -            |
| Twin_B | 11 | 83760647  | C  | A | Substitution | intron_variant            | <i>DLG2</i>       | -            |
| Twin_B | 11 | 88442713  | G  | T | Substitution | intergenic_variant        | -                 | -            |
| Twin_B | 11 | 91384045  | G  | T | Substitution | downstream_gene_variant   | <i>AP002791.1</i> | -            |
| Twin_B | 11 | 93116767  | C  | A | Substitution | intergenic_variant        | -                 | -            |
| Twin_B | 11 | 93907782  | C  | T | Substitution | intergenic_variant        | -                 | rs1382214357 |
| Twin_B | 11 | 103587114 | C  | G | Substitution | intergenic_variant        | -                 | rs1026010882 |
| Twin_B | 11 | 107071946 | A  | G | Substitution | intergenic_variant        | -                 | -            |
| Twin_B | 11 | 112616847 | C  | T | Substitution | intron_variant            | <i>LINC02763</i>  | rs920020081  |
| Twin_B | 11 | 114708783 | G  | A | Substitution | downstream_gene_variant   | <i>NXPE2</i>      | -            |
| Twin_B | 11 | 114958122 | G  | T | Substitution | intergenic_variant        | -                 | -            |
| Twin_B | 11 | 117410900 | C  | A | Substitution | downstream_gene_variant   | <i>CEP164</i>     | -            |
| Twin_B | 11 | 122025753 | C  | T | Substitution | downstream_gene_variant   | <i>MIR100HG</i>   | -            |
| Twin_B | 11 | 122979808 | C  | A | Substitution | intron_variant            | <i>BSX</i>        | -            |
| Twin_B | 11 | 124291010 | G  | A | Substitution | intergenic_variant        | -                 | -            |
| Twin_B | 11 | 128554716 | C  | T | Substitution | intron_variant            | <i>ETS1</i>       | rs78814353   |
| Twin_B | 11 | 132785635 | G  | A | Substitution | intron_variant            | <i>OPCML</i>      | -            |
| Twin_B | 11 | 133338345 | C  | T | Substitution | intron_variant            | <i>OPCML</i>      | rs907145809  |
| Twin_B | 11 | 133761282 | T  | A | Substitution | intergenic_variant        | -                 | -            |
| Twin_B | 12 | 6117683   | C  | T | Substitution | downstream_gene_variant   | <i>VWF</i>        | rs546633664  |
| Twin_B | 12 | 6307820   | C  | T | Substitution | regulatory_region_variant | -                 | rs1256264888 |

|        |    |           |    |   |              |                                    |                   |              |
|--------|----|-----------|----|---|--------------|------------------------------------|-------------------|--------------|
| Twin_B | 12 | 6520513   | G  | A | Substitution | downstream_gene_variant            | <i>NCAPD2</i>     | -            |
| Twin_B | 12 | 6789295   | C  | T | Substitution | intron_variant                     | <i>CD4</i>        | -            |
| Twin_B | 12 | 8205043   | GC | G | Deletion     | downstream_gene_variant            | <i>FAM66C</i>     | rs144267844  |
| Twin_B | 12 | 9683004   | G  | A | Substitution | downstream_gene_variant            | <i>CLEC2D</i>     | rs188982524  |
| Twin_B | 12 | 11785599  | A  | G | Substitution | intron_variant                     | <i>ETV6</i>       | rs778627490  |
| Twin_B | 12 | 18037838  | C  | T | Substitution | intergenic_variant                 | -                 | -            |
| Twin_B | 12 | 20532321  | G  | A | Substitution | intron_variant                     | <i>PDE3A</i>      | -            |
| Twin_B | 12 | 24620263  | G  | A | Substitution | intergenic_variant                 | -                 | -            |
| Twin_B | 12 | 25350278  | C  | T | Substitution | intergenic_variant                 | -                 | rs944670622  |
| Twin_B | 12 | 26030102  | G  | A | Substitution | intron_variant                     | <i>RASSF8</i>     | rs771217533  |
| Twin_B | 12 | 32986809  | G  | A | Substitution | non_coding_transcript_exon_variant | <i>AC087311.1</i> | -            |
| Twin_B | 12 | 34148556  | C  | T | Substitution | upstream_gene_variant              | <i>AC140847.1</i> | rs1252261441 |
| Twin_B | 12 | 35988466  | T  | C | Substitution | intergenic_variant                 | -                 | rs1164988538 |
| Twin_B | 12 | 38746830  | T  | C | Substitution | intron_variant                     | <i>CPNE8</i>      | -            |
| Twin_B | 12 | 43641305  | G  | A | Substitution | intergenic_variant                 | -                 | rs568390024  |
| Twin_B | 12 | 46321777  | C  | T | Substitution | intergenic_variant                 | -                 | rs150303645  |
| Twin_B | 12 | 50558428  | A  | T | Substitution | intron_variant                     | <i>DIP2B</i>      | -            |
| Twin_B | 12 | 61470230  | G  | C | Substitution | intergenic_variant                 | -                 | rs1421114192 |
| Twin_B | 12 | 68411586  | C  | A | Substitution | intron_variant                     | <i>LINC02384</i>  | -            |
| Twin_B | 12 | 77504158  | G  | A | Substitution | intron_variant                     | <i>NAV3</i>       | rs991324887  |
| Twin_B | 12 | 78382902  | C  | T | Substitution | intron_variant                     | <i>AC128707.1</i> | -            |
| Twin_B | 12 | 79065377  | C  | T | Substitution | intron_variant                     | <i>SYT1</i>       | rs993033305  |
| Twin_B | 12 | 80780558  | A  | T | Substitution | intergenic_variant                 | -                 | -            |
| Twin_B | 12 | 83300749  | C  | T | Substitution | intergenic_variant                 | -                 | rs538003003  |
| Twin_B | 12 | 84484910  | G  | A | Substitution | intergenic_variant                 | -                 | -            |
| Twin_B | 12 | 86386833  | C  | A | Substitution | intron_variant                     | <i>MGAT4C</i>     | -            |
| Twin_B | 12 | 87232193  | G  | A | Substitution | intergenic_variant                 | -                 | -            |
| Twin_B | 12 | 87810848  | T  | G | Substitution | intergenic_variant                 | -                 | -            |
| Twin_B | 12 | 88071791  | G  | A | Substitution | missense_variant                   | <i>CEP290</i>     | rs761572735  |
| Twin_B | 12 | 90780665  | C  | T | Substitution | intron_variant                     | <i>AC112481.2</i> | -            |
| Twin_B | 12 | 95719552  | T  | C | Substitution | intron_variant                     | <i>NTN4</i>       | COSV59220221 |
| Twin_B | 12 | 96233025  | A  | G | Substitution | intron_variant                     | <i>ELK3</i>       | -            |
| Twin_B | 12 | 100396583 | T  | A | Substitution | intron_variant                     | <i>SLC17A8</i>    | rs1220972791 |
| Twin_B | 12 | 105124962 | C  | T | Substitution | intron_variant                     | <i>WASHC4</i>     | -            |
| Twin_B | 12 | 109600533 | C  | G | Substitution | downstream_gene_variant            | <i>MVK</i>        | -            |
| Twin_B | 12 | 113992218 | G  | A | Substitution | intergenic_variant                 | -                 | -            |
| Twin_B | 12 | 114026760 | G  | A | Substitution | intergenic_variant                 | -                 | rs142779521  |
| Twin_B | 12 | 115283072 | C  | A | Substitution | intergenic_variant                 | -                 | -            |
| Twin_B | 12 | 116627058 | G  | C | Substitution | intergenic_variant                 | -                 | -            |
| Twin_B | 12 | 121968151 | A  | T | Substitution | missense_variant                   | <i>CFAP251</i>    | -            |
| Twin_B | 12 | 126210035 | C  | T | Substitution | intron_variant                     | <i>AC007368.1</i> | -            |
| Twin_B | 12 | 128451756 | C  | T | Substitution | intron_variant                     | <i>TMEM132C</i>   | -            |

|        |    |           |    |     |              |                         |                   |                                                            |
|--------|----|-----------|----|-----|--------------|-------------------------|-------------------|------------------------------------------------------------|
| Twin_B | 12 | 129158414 | A  | G   | Substitution | intron_variant          | <i>TMEM132D</i>   | -                                                          |
| Twin_B | 12 | 129545572 | G  | A   | Substitution | intron_variant          | <i>TMEM132D</i>   | rs548980444                                                |
| Twin_B | 12 | 132821132 | C  | T   | Substitution | downstream_gene_variant | <i>CHFR</i>       | rs981825385                                                |
| Twin_B | 13 | 16017183  | C  | T   | Substitution | intergenic_variant      | -                 | rs1346805079                                               |
| Twin_B | 13 | 16661736  | C  | A   | Substitution | intergenic_variant      | -                 | rs1306983302                                               |
| Twin_B | 13 | 17304667  | T  | A   | Substitution | intergenic_variant      | -                 | rs1456450575                                               |
| Twin_B | 13 | 17466593  | C  | T   | Substitution | intergenic_variant      | -                 | rs1444264382                                               |
| Twin_B | 13 | 34712768  | G  | A   | Substitution | intergenic_variant      | -                 | rs956638263                                                |
| Twin_B | 13 | 37492154  | T  | A   | Substitution | intergenic_variant      | -                 | rs5028161                                                  |
| Twin_B | 13 | 51338069  | C  | T   | Substitution | intron_variant          | <i>SERPINE3</i>   | rs943522065                                                |
| Twin_B | 13 | 57247644  | C  | T   | Substitution | intergenic_variant      | -                 | rs1015436925                                               |
| Twin_B | 13 | 64005202  | A  | C   | Substitution | intron_variant          | <i>LINC00355</i>  | -                                                          |
| Twin_B | 13 | 66744717  | G  | A   | Substitution | intron_variant          | <i>PCDH9</i>      | rs1436271609                                               |
| Twin_B | 13 | 68771491  | A  | G   | Substitution | intergenic_variant      | -                 | -                                                          |
| Twin_B | 13 | 81289794  | T  | C   | Substitution | intron_variant          | <i>AL353633.1</i> | rs1481888041                                               |
| Twin_B | 13 | 92237367  | G  | A   | Substitution | downstream_gene_variant | <i>AL157815.1</i> | rs1265338638                                               |
| Twin_B | 13 | 95505939  | C  | G   | Substitution | intron_variant          | <i>CLDN10</i>     | -                                                          |
| Twin_B | 13 | 106932614 | C  | T   | Substitution | intergenic_variant      | -                 | -                                                          |
| Twin_B | 13 | 109688927 | C  | T   | Substitution | intron_variant          | <i>AL163541.1</i> | -                                                          |
| Twin_B | 13 | 112351281 | G  | A   | Substitution | intergenic_variant      | -                 | rs115643630                                                |
| Twin_B | 13 | 112451541 | C  | T   | Substitution | intergenic_variant      | -                 | rs1471601068                                               |
| Twin_B | 14 | 25383375  | A  | AT  | Insertion    | intergenic_variant      | -                 | rs1443265250                                               |
| Twin_B | 14 | 28045753  | A  | G   | Substitution | intergenic_variant      | -                 | rs1373127559                                               |
| Twin_B | 14 | 28160448  | C  | G   | Substitution | intergenic_variant      | -                 | -                                                          |
| Twin_B | 14 | 28481339  | C  | T   | Substitution | intergenic_variant      | -                 | rs987212689                                                |
| Twin_B | 14 | 28933071  | A  | T   | Substitution | downstream_gene_variant | <i>LINC02327</i>  | -                                                          |
| Twin_B | 14 | 34755189  | T  | C   | Substitution | downstream_gene_variant | <i>BAZIA</i>      | -                                                          |
| Twin_B | 14 | 39719161  | C  | T   | Substitution | intron_variant          | <i>AL049828.1</i> | -                                                          |
| Twin_B | 14 | 39760915  | GC | G   | Deletion     | intron_variant          | <i>AL049828.1</i> | -                                                          |
| Twin_B | 14 | 40646136  | G  | C   | Substitution | intron_variant          | <i>AL390800.1</i> | -                                                          |
| Twin_B | 14 | 42163357  | C  | T   | Substitution | intergenic_variant      | -                 | -                                                          |
| Twin_B | 14 | 44806590  | C  | A   | Substitution | intergenic_variant      | -                 | -                                                          |
| Twin_B | 14 | 45687961  | C  | A   | Substitution | intergenic_variant      | -                 | -                                                          |
| Twin_B | 14 | 49208635  | C  | T   | Substitution | intergenic_variant      | -                 | -                                                          |
| Twin_B | 14 | 52546562  | G  | A   | Substitution | intron_variant          | <i>TXNDC16</i>    | -                                                          |
| Twin_B | 14 | 55273174  | G  | GTT | Insertion    | intron_variant          | <i>FBXO34</i>     | -                                                          |
| Twin_B | 14 | 62950522  | C  | T   | Substitution | missense_variant        | <i>KCNH5</i>      | rs58777164,<br>CM1310653,<br>COSV59758318,<br>COSV59758899 |
| Twin_B | 14 | 76286201  | T  | G   | Substitution | downstream_gene_variant | <i>AC016526.3</i> | -                                                          |
| Twin_B | 14 | 87098315  | C  | T   | Substitution | intergenic_variant      | -                 | -                                                          |
| Twin_B | 14 | 94965692  | G  | C   | Substitution | upstream_gene_variant   | <i>LINC02279</i>  | -                                                          |
| Twin_B | 14 | 96647102  | C  | T   | Substitution | intergenic_variant      | -                 | -                                                          |

|        |    |          |      |     |              |                           |                   |              |
|--------|----|----------|------|-----|--------------|---------------------------|-------------------|--------------|
| Twin_B | 14 | 98254213 | A    | T   | Substitution | intergenic_variant        | -                 | rs200791071  |
| Twin_B | 14 | 99920248 | A    | G   | Substitution | downstream_gene_variant   | <i>EML1</i>       | -            |
| Twin_B | 15 | 17031425 | C    | T   | Substitution | intergenic_variant        | -                 | rs988560630  |
| Twin_B | 15 | 24913380 | C    | T   | Substitution | downstream_gene_variant   | <i>AC090983.2</i> | rs995136908  |
| Twin_B | 15 | 25046210 | A    | G   | Substitution | downstream_gene_variant   | <i>SNHG14</i>     | -            |
| Twin_B | 15 | 26017195 | A    | G   | Substitution | intron_variant            | <i>LINC02346</i>  | -            |
| Twin_B | 15 | 40140978 | A    | G   | Substitution | intergenic_variant        | -                 | -            |
| Twin_B | 15 | 45848202 | CAAA | C   | Deletion     | intron_variant            | <i>AC068722.1</i> | rs1232293898 |
| Twin_B | 15 | 48080087 | A    | G   | Substitution | intergenic_variant        | -                 | -            |
| Twin_B | 15 | 48928081 | AG   | A   | Deletion     | intron_variant            | <i>SHC4</i>       | -            |
| Twin_B | 15 | 60120205 | G    | A   | Substitution | regulatory_region_variant | -                 | -            |
| Twin_B | 15 | 60352764 | T    | C   | Substitution | downstream_gene_variant   | <i>ANXA2</i>      | rs1242885715 |
| Twin_B | 15 | 71202412 | A    | G   | Substitution | intron_variant            | <i>THSD4</i>      | -            |
| Twin_B | 15 | 72502854 | C    | T   | Substitution | intron_variant            | <i>ARIH1</i>      | rs1435288541 |
| Twin_B | 15 | 77267388 | A    | G   | Substitution | intron_variant            | <i>PEAK1</i>      | -            |
| Twin_B | 15 | 79562906 | G    | A   | Substitution | upstream_gene_variant     | <i>AC023968.2</i> | -            |
| Twin_B | 15 | 80681168 | T    | A   | Substitution | intron_variant            | <i>ABHD17C</i>    | -            |
| Twin_B | 15 | 83132180 | G    | C   | Substitution | 3_prime_UTR_variant       | <i>HDGFL3</i>     | -            |
| Twin_B | 15 | 87983261 | T    | A   | Substitution | intron_variant            | <i>NTRK3</i>      | -            |
| Twin_B | 15 | 95004101 | T    | C   | Substitution | intron_variant            | <i>AC087633.2</i> | -            |
| Twin_B | 16 | 737082   | C    | G   | Substitution | downstream_gene_variant   | <i>CIAO3</i>      | -            |
| Twin_B | 16 | 1550273  | G    | A   | Substitution | downstream_gene_variant   | <i>AL031719.2</i> | -            |
| Twin_B | 16 | 5534803  | T    | C   | Substitution | intron_variant            | <i>RBFOX1</i>     | -            |
| Twin_B | 16 | 9532674  | G    | T   | Substitution | intergenic_variant        | -                 | rs1341344135 |
| Twin_B | 16 | 18537225 | T    | TAG | Insertion    | downstream_gene_variant   | <i>AC136618.2</i> | -            |
| Twin_B | 16 | 19362955 | T    | G   | Substitution | intron_variant            | <i>AC130456.2</i> | rs140765053  |
| Twin_B | 16 | 20424714 | G    | A   | Substitution | TF_binding_site_variant   | <i>ACSM5</i>      | -            |
| Twin_B | 16 | 22677228 | G    | A   | Substitution | intergenic_variant        | -                 | -            |
| Twin_B | 16 | 32008073 | G    | A   | Substitution | downstream_gene_variant   | <i>AC142381.3</i> | -            |
| Twin_B | 16 | 35787574 | T    | C   | Substitution | upstream_gene_variant     | <i>AC106785.2</i> | rs1243395959 |
| Twin_B | 16 | 36133454 | G    | A   | Substitution | intergenic_variant        | -                 | -            |
| Twin_B | 16 | 50321074 | G    | A   | Substitution | downstream_gene_variant   | <i>ADCY7</i>      | rs372755442  |
| Twin_B | 16 | 51336582 | G    | A   | Substitution | intron_variant            | <i>AC087564.1</i> | rs1461056097 |
| Twin_B | 16 | 54256124 | G    | C   | Substitution | intron_variant            | <i>LINC02169</i>  | -            |
| Twin_B | 16 | 57821035 | G    | A   | Substitution | downstream_gene_variant   | <i>AC092118.1</i> | -            |
| Twin_B | 16 | 64699930 | G    | A   | Substitution | intergenic_variant        | -                 | -            |
| Twin_B | 16 | 65902588 | C    | T   | Substitution | intergenic_variant        | -                 | rs115844235  |
| Twin_B | 16 | 67105628 | T    | A   | Substitution | downstream_gene_variant   | <i>CBFB</i>       | rs1349050758 |
| Twin_B | 16 | 67608941 | A    | G   | Substitution | intron_variant            | <i>CTCF</i>       | rs892105462  |
| Twin_B | 16 | 68548732 | C    | G   | Substitution | intron_variant            | <i>ZFP90</i>      | rs564497116  |
| Twin_B | 16 | 69148663 | G    | A   | Substitution | intron_variant            | <i>UTP4</i>       | rs1469117705 |
| Twin_B | 16 | 70802883 | G    | T   | Substitution | 3_prime_UTR_variant       | <i>HYDIN</i>      | -            |

|        |    |          |   |   |              |                                    |            |              |
|--------|----|----------|---|---|--------------|------------------------------------|------------|--------------|
| Twin_B | 16 | 73552032 | A | T | Substitution | intron_variant                     | ZFH3       | rs562962066  |
| Twin_B | 16 | 77256710 | G | T | Substitution | intron_variant                     | ADAMTS18   | -            |
| Twin_B | 16 | 77493285 | T | C | Substitution | intergenic_variant                 | -          | -            |
| Twin_B | 16 | 82066056 | G | T | Substitution | intron_variant                     | HSD17B2    | -            |
| Twin_B | 16 | 82874338 | C | T | Substitution | intron_variant                     | CDH13      | -            |
| Twin_B | 16 | 85313584 | C | A | Substitution | downstream_gene_variant            | AC092275.1 | rs1483404740 |
| Twin_B | 17 | 4511744  | T | G | Substitution | intron_variant                     | SPNS2      | -            |
| Twin_B | 17 | 4976602  | G | T | Substitution | downstream_gene_variant            | AC004771.1 | -            |
| Twin_B | 17 | 9021059  | G | T | Substitution | regulatory_region_variant          | -          | -            |
| Twin_B | 17 | 10363095 | A | T | Substitution | intron_variant                     | MYH13      | -            |
| Twin_B | 17 | 10978272 | C | T | Substitution | intergenic_variant                 | -          | -            |
| Twin_B | 17 | 14670774 | C | A | Substitution | intergenic_variant                 | -          | -            |
| Twin_B | 17 | 18385438 | G | A | Substitution | downstream_gene_variant            | AL353997.5 | rs1682277    |
| Twin_B | 17 | 27983490 | G | A | Substitution | intron_variant                     | LINC01992  | rs778201958  |
| Twin_B | 17 | 30755275 | A | C | Substitution | intron_variant                     | SUZ12P1    | -            |
| Twin_B | 17 | 31863521 | T | A | Substitution | splice_region_variant              | UTP6       | rs78181996   |
| Twin_B | 17 | 34811921 | G | A | Substitution | intergenic_variant                 | -          | rs1011328968 |
| Twin_B | 17 | 40381174 | C | T | Substitution | non_coding_transcript_exon_variant | AC080112.2 | -            |
| Twin_B | 17 | 41094327 | C | T | Substitution | downstream_gene_variant            | AC100808.1 | -            |
| Twin_B | 17 | 41488518 | C | T | Substitution | intron_variant                     | KRT36      | -            |
| Twin_B | 17 | 41662731 | C | G | Substitution | TF_binding_site_variant            | AC130686.1 | -            |
| Twin_B | 17 | 52148573 | C | T | Substitution | intron_variant                     | CA10       | -            |
| Twin_B | 17 | 52202053 | T | G | Substitution | intergenic_variant                 | -          | -            |
| Twin_B | 17 | 56525449 | C | T | Substitution | intergenic_variant                 | -          | -            |
| Twin_B | 17 | 59529075 | G | A | Substitution | upstream_gene_variant              | LINC01476  | -            |
| Twin_B | 17 | 63728030 | A | G | Substitution | intron_variant                     | STRADA     | -            |
| Twin_B | 17 | 64448232 | C | A | Substitution | upstream_gene_variant              | MILR1      | -            |
| Twin_B | 17 | 74236263 | A | G | Substitution | intron_variant                     | TTYH2      | rs1373649197 |
| Twin_B | 17 | 74482732 | T | C | Substitution | intron_variant                     | CD300A     | rs9900660    |
| Twin_B | 17 | 79561251 | G | A | Substitution | intergenic_variant                 | -          | rs924318212  |
| Twin_B | 18 | 524695   | A | T | Substitution | intergenic_variant                 | -          | -            |
| Twin_B | 18 | 924915   | C | G | Substitution | downstream_gene_variant            | LINC01904  | -            |
| Twin_B | 18 | 8101586  | A | C | Substitution | intron_variant                     | PTPRM      | -            |
| Twin_B | 18 | 14702966 | G | A | Substitution | intron_variant                     | MODIFIER   | rs1201652554 |
| Twin_B | 18 | 14791710 | G | A | Substitution | intron_variant                     | ANKRD30B   | -            |
| Twin_B | 18 | 15293364 | T | C | Substitution | intergenic_variant                 | -          | -            |
| Twin_B | 18 | 20715870 | G | A | Substitution | intergenic_variant                 | -          | rs1457573477 |
| Twin_B | 18 | 27402273 | G | A | Substitution | downstream_gene_variant            | AC068408.1 | rs1054519887 |
| Twin_B | 18 | 29688544 | T | C | Substitution | intergenic_variant                 | -          | rs147589821  |
| Twin_B | 18 | 29768107 | G | A | Substitution | intergenic_variant                 | -          | rs1280023452 |
| Twin_B | 18 | 30770852 | G | A | Substitution | intergenic_variant                 | -          | rs554280292  |
| Twin_B | 18 | 32293060 | C | T | Substitution | downstream_gene_variant            | AC015563.2 | -            |

|        |    |          |                                                                                   |    |              |                           |                   |              |
|--------|----|----------|-----------------------------------------------------------------------------------|----|--------------|---------------------------|-------------------|--------------|
| Twin_B | 18 | 33117524 | G                                                                                 | A  | Substitution | intron_variant            | <i>CCDC178</i>    | rs138071520  |
| Twin_B | 18 | 33505461 | T                                                                                 | C  | Substitution | intergenic_variant        | -                 | -            |
| Twin_B | 18 | 43720938 | CA                                                                                | C  | Deletion     | intergenic_variant        | -                 | -            |
| Twin_B | 18 | 52406485 | T                                                                                 | C  | Substitution | intron_variant            | <i>DCC</i>        | -            |
| Twin_B | 18 | 56544081 | T                                                                                 | C  | Substitution | intergenic_variant        | -                 | rs1341586653 |
| Twin_B | 18 | 58043724 | G                                                                                 | A  | Substitution | regulatory_region_variant | -                 | -            |
| Twin_B | 18 | 61155354 | C                                                                                 | T  | Substitution | intergenic_variant        | -                 | -            |
| Twin_B | 18 | 61706959 | G                                                                                 | A  | Substitution | intron_variant            | <i>AC105094.2</i> | -            |
| Twin_B | 18 | 62562373 | C                                                                                 | A  | Substitution | downstream_gene_variant   | <i>ZCCHC2</i>     | -            |
| Twin_B | 18 | 63887009 | AG                                                                                | A  | Deletion     | intron_variant            | <i>SERPINB2</i>   | -            |
| Twin_B | 18 | 67455918 | G                                                                                 | A  | Substitution | intergenic_variant        | -                 | -            |
| Twin_B | 18 | 74237595 | C                                                                                 | T  | Substitution | intron_variant            | <i>AC090398.1</i> | -            |
| Twin_B | 18 | 75984267 | C                                                                                 | G  | Substitution | intergenic_variant        | -                 | -            |
| Twin_B | 19 | 8086471  | T                                                                                 | A  | Substitution | downstream_gene_variant   | <i>FBN3</i>       | rs113759974  |
| Twin_B | 19 | 8183739  | C                                                                                 | A  | Substitution | intergenic_variant        | -                 | rs946588717  |
| Twin_B | 19 | 12943750 | AGCAGAG<br>GCTTAAG<br>GAGGAGG<br>AAGAAGA<br>CAAGAAA<br>CGCAAAG<br>AGGAGGA<br>GGAG | A  | Deletion     | frameshift_variant        | <i>CALR</i>       | rs1555760738 |
| Twin_B | 19 | 16774565 | G                                                                                 | A  | Substitution | intron_variant            | <i>NWD1</i>       | rs577537244  |
| Twin_B | 19 | 17247444 | C                                                                                 | A  | Substitution | downstream_gene_variant   | <i>USHBP1</i>     | -            |
| Twin_B | 19 | 19549515 | C                                                                                 | T  | Substitution | downstream_gene_variant   | <i>CILP2</i>      | -            |
| Twin_B | 19 | 22564447 | G                                                                                 | A  | Substitution | intergenic_variant        | -                 | rs146882932  |
| Twin_B | 19 | 22624713 | TG                                                                                | T  | Deletion     | downstream_gene_variant   | <i>AC011467.2</i> | rs1285085532 |
| Twin_B | 19 | 27496424 | T                                                                                 | C  | Substitution | intergenic_variant        | -                 | rs1568343244 |
| Twin_B | 19 | 28110861 | A                                                                                 | C  | Substitution | intron_variant            | <i>AC010511.1</i> | -            |
| Twin_B | 19 | 31656627 | G                                                                                 | A  | Substitution | upstream_gene_variant     | <i>RNA5SP471</i>  | -            |
| Twin_B | 19 | 31931918 | G                                                                                 | C  | Substitution | intron_variant            | <i>LINC01837</i>  | -            |
| Twin_B | 19 | 38958665 | C                                                                                 | G  | Substitution | intron_variant            | <i>FBXO17</i>     | -            |
| Twin_B | 19 | 41492820 | G                                                                                 | A  | Substitution | downstream_gene_variant   | <i>PCAT19</i>     | -            |
| Twin_B | 19 | 47920579 | G                                                                                 | A  | Substitution | TF_binding_site_variant   | -                 | rs367708441  |
| Twin_B | 19 | 53377680 | A                                                                                 | G  | Substitution | downstream_gene_variant   | <i>ZNF525</i>     | -            |
| Twin_B | 19 | 55277604 | C                                                                                 | G  | Substitution | downstream_gene_variant   | <i>HSPBP1</i>     | -            |
| Twin_B | 20 | 173236   | G                                                                                 | A  | Substitution | intergenic_variant        | -                 | rs1034386228 |
| Twin_B | 20 | 1061518  | G                                                                                 | A  | Substitution | intron_variant            | <i>AL110114.1</i> | -            |
| Twin_B | 20 | 12995529 | T                                                                                 | C  | Substitution | intron_variant            | <i>LINC01723</i>  | rs1438512520 |
| Twin_B | 20 | 14336990 | T                                                                                 | C  | Substitution | intron_variant            | <i>FLRT3</i>      | -            |
| Twin_B | 20 | 21629260 | C                                                                                 | T  | Substitution | intron_variant            | <i>LINC01726</i>  | rs540343176  |
| Twin_B | 20 | 22689135 | A                                                                                 | T  | Substitution | intron_variant            | <i>AL158175.1</i> | -            |
| Twin_B | 20 | 28497717 | AG                                                                                | A  | Deletion     | intergenic_variant        | -                 | rs1434446279 |
| Twin_B | 20 | 29525288 | A                                                                                 | AC | Insertion    | intergenic_variant        | -                 | rs1188254666 |
| Twin_B | 20 | 30212896 | T                                                                                 | G  | Substitution | downstream_gene_variant   | <i>CFTRP3</i>     | -            |

|        |    |           |       |   |              |                                    |                   |              |
|--------|----|-----------|-------|---|--------------|------------------------------------|-------------------|--------------|
| Twin_B | 20 | 30755746  | C     | T | Substitution | intergenic_variant                 | -                 | -            |
| Twin_B | 20 | 39854921  | G     | A | Substitution | intergenic_variant                 | -                 | rs1346211420 |
| Twin_B | 20 | 48547263  | G     | A | Substitution | intergenic_variant                 | -                 | -            |
| Twin_B | 20 | 50715766  | T     | A | Substitution | intergenic_variant                 | -                 | -            |
| Twin_B | 20 | 50895064  | C     | T | Substitution | intron_variant                     | <i>ADNP</i>       | -            |
| Twin_B | 20 | 52629042  | C     | G | Substitution | intron_variant                     | <i>LINC01524</i>  | -            |
| Twin_B | 20 | 64283610  | C     | G | Substitution | intron_variant                     | <i>PCMTD2</i>     | rs1428268334 |
| Twin_B | 21 | 8020747   | T     | A | Substitution | intergenic_variant                 | -                 | rs1443418402 |
| Twin_B | 21 | 9928024   | G     | A | Substitution | intergenic_variant                 | -                 | rs1342179447 |
| Twin_B | 21 | 14455201  | C     | A | Substitution | intergenic_variant                 | -                 | -            |
| Twin_B | 21 | 24993236  | A     | G | Substitution | intron_variant                     | <i>LINC01692</i>  | -            |
| Twin_B | 21 | 36182754  | A     | G | Substitution | intron_variant                     | <i>DOP1B</i>      | -            |
| Twin_B | 21 | 40180743  | A     | T | Substitution | intron_variant                     | <i>DSCAM</i>      | -            |
| Twin_B | 21 | 40558302  | G     | T | Substitution | intron_variant                     | <i>DSCAM</i>      | -            |
| Twin_B | 21 | 46037210  | G     | A | Substitution | non_coding_transcript_exon_variant | <i>AP001476.1</i> | -            |
| Twin_B | 22 | 11356944  | CT    | C | Deletion     | intergenic_variant                 | -                 | rs1322963034 |
| Twin_B | 22 | 16847213  | CTTAA | C | Deletion     | downstream_gene_variant            | <i>AC007064.4</i> | -            |
| Twin_B | 22 | 28259506  | G     | A | Substitution | intron_variant                     | <i>TTC28</i>      | -            |
| Twin_B | 22 | 30635421  | T     | C | Substitution | TF_binding_site_variant            | -                 | -            |
| Twin_B | 22 | 32657960  | T     | G | Substitution | intron_variant                     | <i>SYN3</i>       | -            |
| Twin_B | 22 | 34618472  | G     | A | Substitution | intergenic_variant                 | -                 | rs867876389  |
| Twin_B | 22 | 34793591  | T     | C | Substitution | intron_variant                     | <i>LINC02885</i>  | -            |
| Twin_B | 22 | 36709756  | C     | T | Substitution | intron_variant                     | <i>AL049749.1</i> | rs567131721  |
| Twin_B | 22 | 37961231  | A     | G | Substitution | intron_variant                     | <i>POLR2F</i>     | -            |
| Twin_B | 22 | 42966759  | C     | A | Substitution | intron_variant                     | <i>PACSIN2</i>    | -            |
| Twin_B | 22 | 43588922  | C     | T | Substitution | intron_variant                     | <i>EFCAB6</i>     | rs567321760  |
| Twin_B | 22 | 48568894  | G     | C | Substitution | intron_variant                     | <i>TAF5</i>       | -            |
| Twin_B | X  | 1604020   | G     | T | Substitution | downstream_gene_variant            | <i>AKAP17A</i>    | rs560737268  |
| Twin_B | X  | 12284898  | G     | A | Substitution | intron_variant                     | <i>FRMPD4</i>     | COSV66220435 |
| Twin_B | X  | 17501537  | C     | A | Substitution | intron_variant                     | <i>NHS</i>        | -            |
| Twin_B | X  | 19248964  | C     | A | Substitution | intergenic_variant                 | -                 | -            |
| Twin_B | X  | 24411967  | C     | T | Substitution | intergenic_variant                 | -                 | -            |
| Twin_B | X  | 35556794  | T     | C | Substitution | intergenic_variant                 | -                 | -            |
| Twin_B | X  | 35907670  | T     | C | Substitution | intergenic_variant                 | -                 | -            |
| Twin_B | X  | 62714059  | C     | T | Substitution | intergenic_variant                 | -                 | rs143334744  |
| Twin_B | X  | 70098264  | T     | A | Substitution | intergenic_variant                 | -                 | -            |
| Twin_B | X  | 73335262  | T     | C | Substitution | intergenic_variant                 | -                 | -            |
| Twin_B | X  | 78738428  | T     | A | Substitution | intergenic_variant                 | -                 | -            |
| Twin_B | X  | 80869548  | G     | C | Substitution | intergenic_variant                 | -                 | -            |
| Twin_B | X  | 87003014  | A     | G | Substitution | intergenic_variant                 | -                 | -            |
| Twin_B | X  | 92949595  | G     | A | Substitution | intergenic_variant                 | -                 | -            |
| Twin_B | X  | 107445958 | C     | T | Substitution | intergenic_variant                 | -                 | rs1441643081 |

|        |   |           |   |   |              |                    |               |   |
|--------|---|-----------|---|---|--------------|--------------------|---------------|---|
| Twin_B | X | 108369773 | T | A | Substitution | intron_variant     | <i>COL4A6</i> | - |
| Twin_B | X | 113433231 | T | G | Substitution | intergenic_variant | -             | - |
| Twin_B | X | 115105220 | C | T | Substitution | intergenic_variant | -             | - |
| Twin_B | X | 117525429 | C | A | Substitution | intergenic_variant | -             | - |

Note: Gene annotation not provided for intergenic variants, regulatory region variants and TF binding site variants. Catalogue corresponds to the high-confidence call set prior to vafCorrect genotyping and filtering (see Methods - *Variant calling*). Gene names are provided in italics in accordance with the current HUGO Gene Nomenclature Committee (HGNC) guidelines.<sup>50</sup>

\*An additional variant from the myeloid-gene panel is also included for Twin A (marked with an asterisk). This is a variant detected in the targeted myeloid-gene panel sequencing but with no high-confidence support from whole genome sequencing data; therefore, it was excluded from the downstream analysis.



**Supplementary Table 2. Catalogue of somatic structural variants in twin A and twin B**

| Individual | SV_class           | SV_length | Chr1 | Pos1             | Chr2 | Pos2              |
|------------|--------------------|-----------|------|------------------|------|-------------------|
| Twin_A     | tandem_duplication | 165127    | 11   | 54384289         | 11   | 54549416          |
| Twin_A     | tandem_duplication | 71117     | 12   | 11054568         | 12   | 11125685          |
| Twin_A     | tandem_duplication | 75902     | 20   | 23727447         | 20   | 23803349          |
| Twin_A     | translocation      | .         | 6    | [chr6:50867003[G | 12   | [chr12:93869517[C |
| Twin_A     | translocation      | .         | 3    | ]chr3:11573465]A | 15   | T[chr15:78040845[ |
| Twin_B     | tandem_duplication | 272076    | 11   | 26184499         | 11   | 26456575          |
| Twin_B     | deletion           | 397816    | 11   | 48727000         | 11   | 55124816          |
| Twin_B     | translocation      | .         | 6    | [chr6:43581762[C | 19   | [chr19:41643986[C |
| Twin_B     | deletion           | 604488    | 2    | 92998101         | 1    | 93602589          |
| Twin_B     | translocation      | .         | 5    | G]chr5:248313]   | 5    | T]chr5:1579393]   |

**Supplementary Table 3. Summary of somatic mutations shared between twin A and twin B**

| #  | Chr | Pos       | Ref                                                                                           | Alt | Mutation_type | Annotation                                       | Shared_annotation                               | Gene              | Existing_variation           | CCF_in_Twin_A | CCF_in_Twin_B | Used_in_Validation |
|----|-----|-----------|-----------------------------------------------------------------------------------------------|-----|---------------|--------------------------------------------------|-------------------------------------------------|-------------------|------------------------------|---------------|---------------|--------------------|
| 1  | 1   | 237523679 | G                                                                                             | A   | Substitution  | intron_variant                                   | High-confidence call set; vafCorrect genotyping | <i>RYR2</i>       | rs1165384474                 | 0.93          | 0.54          | Yes                |
| 2  | 2   | 236024598 | A                                                                                             | G   | Substitution  | intron_variant                                   | High-confidence call set; vafCorrect genotyping | <i>AGAP1</i>      | -                            | 1.05          | 0.99          | Yes                |
| 3  | 3   | 9646697   | T                                                                                             | A   | Substitution  | upstream_gene_variant                            | High-confidence call set; vafCorrect genotyping | <i>MTMR14</i>     | rs1001727401                 | 0.93          | 1.06          | No                 |
| 4  | 3   | 187366417 | G                                                                                             | A   | Substitution  | upstream_gene_variant                            | High-confidence call set; vafCorrect genotyping | <i>RTP4</i>       | -                            | 1.01          | 1.16          | Yes                |
| 5  | 5   | 18474168  | C                                                                                             | T   | Substitution  | intergenic_variant                               | High-confidence call set; vafCorrect genotyping | -                 | -                            | 1.17          | 0.92          | No                 |
| 6  | 7   | 54587046  | C                                                                                             | A   | Substitution  | intergenic_variant                               | High-confidence call set; vafCorrect genotyping | -                 | -                            | 0.89          | 0.37          | No                 |
| 7  | 10  | 103273122 | G                                                                                             | A   | Substitution  | upstream_gene_variant                            | High-confidence call set                        | <i>INA</i>        | rs1286474689                 | 0.39          | 0.57          | No                 |
| 8  | 16  | 67608941  | A                                                                                             | G   | Substitution  | intron_variant                                   | High-confidence call set                        | <i>CTCF</i>       | rs892105462                  | 0.97          | 0.25          | No                 |
| 9  | 16  | 85313584  | C                                                                                             | A   | Substitution  | downstream_gene_variant                          | High-confidence call set; vafCorrect genotyping | <i>AC092275.1</i> | rs1483404740                 | 1.03          | 1.01          | Yes                |
| 10 | 19  | 12943750  | AGCAG<br>AGGCT<br>TAAGG<br>AGGAG<br>GAAGA<br>AGACA<br>AGAAA<br>CGCAA<br>AGAGG<br>AGGAG<br>GAG | A   | Deletion      | frameshift_variant                               | High-confidence call set                        | <i>CALR</i>       | rs1555760738                 | 0.69*         | 1.07          | Yes                |
| 11 | 18  | 9601220   | A                                                                                             | G   | Substitution  | intron_variant                                   | vafCorrect genotyping                           | <i>PPP4R1</i>     | rs982592192,<br>COSV53280449 | 0.49          | 0.33          | No                 |
| 12 | 2   | 93865725  | G                                                                                             | C   | Substitution  | intergenic_variant                               | vafCorrect genotyping                           | -                 | -                            | 2             | 1.4           | No                 |
| 13 | 4   | 119161162 | A                                                                                             | C   | Substitution  | intron_variant                                   | vafCorrect genotyping                           | <i>MYOZ2</i>      | -                            | 0.75          | 0.2           | No                 |
| 14 | 4   | 16908350  | G                                                                                             | T   | Substitution  | intergenic_variant;<br>regulatory_region_variant | vafCorrect genotyping                           | -                 | rs750655685                  | 0.79          | 1.06          | No                 |
| 15 | 5   | 130265666 | C                                                                                             | T   | Substitution  | intergenic_variant                               | vafCorrect genotyping                           | -                 | rs62391477                   | 0.61          | 0.68          | No                 |
| 16 | 7   | 71219697  | C                                                                                             | T   | Substitution  | intron_variant                                   | vafCorrect genotyping                           | <i>GALNT17</i>    | -                            | 0.77          | 0.82          | No                 |
| 17 | 1   | 93828702  | C                                                                                             | CT  | Insertion     | intron_variant;<br>regulatory_region_variant     | vafCorrect genotyping                           | <i>BCAR3</i>      | rs969811086                  | 0.654         | 0.31          | No                 |
| 18 | 2   | 193562677 | CGT                                                                                           | C   | Deletion      | intergenic_variant                               | vafCorrect genotyping                           | -                 | rs59053823                   | 0.53          | 0.26          | No                 |
| 19 | 4   | 26343555  | G                                                                                             | GT  | Insertion     | upstream_gene_variant                            | vafCorrect genotyping                           | <i>RBPJ</i>       | rs969811086                  | 0.43          | 0.26          | No                 |
| 20 | 4   | 61895466  | AAAT                                                                                          | A   | Deletion      | upstream_gene_variant                            | vafCorrect genotyping                           | <i>ADGRL3</i>     | rs969811086                  | 0.62          | 0.26          | No                 |
| 21 | 6   | 7238595   | C                                                                                             | CT  | Insertion     | intron_variant                                   | vafCorrect genotyping                           | <i>RREB1</i>      | rs796560101                  | 0.41          | 0.28          | No                 |
| 22 | 7   | 43378810  | C                                                                                             | CA  | Insertion     | intron_variant                                   | vafCorrect genotyping                           | <i>HECW1</i>      | rs202007736                  | 0.5           | 0.23          | No                 |
| 23 | 8   | 17691704  | G                                                                                             | GT  | Insertion     | regulatory_region_variant                        | vafCorrect genotyping                           | -                 | rs200014137                  | 0.3           | 0.32          | No                 |
| 24 | 9   | 67205531  | TG                                                                                            | T   | Deletion      | intron_variant                                   | vafCorrect genotyping                           | <i>CNTNAP3P2</i>  | rs368975415                  | 0.3           | 0.5           | No                 |

Note: Gene annotation not provided for intergenic variants. CCF, cancer cell fraction, i.e., estimate of the fraction of tumor cells that carry the mutation. Somatic shared variants from the 'High-confidence call set' are reported in both Twin A and Twin B in Supplementary Table 1. Somatic shared variants identified after vafCorrect genotyping are reported in either Twin A or Twin B in Supplementary Table 1 (see Methods - *Variant calling* and *Mutation clustering*). Gene names are provided in italics

in accordance with the current HUGO Gene Nomenclature Committee (HGNC) guidelines.<sup>50</sup> \*95% confidence interval for *CALR* CCF: 0.42-1.

**Supplementary Table 4. Summary of non-silent coding variants in twin A and twin B**

| Individual | Chr | Pos        | Ref                                                                                           | Alt | Mutation_type | Annotation         | Impact   | Gene          | Existing_variation                                 | Clinical_significance              | CADD_PHRED |
|------------|-----|------------|-----------------------------------------------------------------------------------------------|-----|---------------|--------------------|----------|---------------|----------------------------------------------------|------------------------------------|------------|
| Twin_A     | 1   | 53327841   | CA                                                                                            | C   | Deletion      | frameshift_variant | HIGH     | <i>LRP8</i>   | rs761955852, COSV60099910                          | -                                  | 22         |
| Twin_A     | 4   | 105234449  | TA                                                                                            | T   | Deletion      | frameshift_variant | HIGH     | <i>TET2</i>   | -                                                  | -                                  | -          |
| Twin_A     | 4   | 105259633* | G                                                                                             | A   | Substitution  | missense_variant   | MODERATE | <i>TET2</i>   | COSV54404036                                       | pathogenic                         | 27.2       |
| Twin_A     | 11  | 17634218   | C                                                                                             | T   | Substitution  | stop_gained        | HIGH     | <i>OTOG</i>   | rs866476223                                        | pathogenic                         | 40         |
| Twin_A     | 19  | 12943750   | AGCAG<br>AGGCT<br>TAAGG<br>AGGAG<br>GAAGA<br>AGACA<br>AGAAA<br>CGCAA<br>AGAGG<br>AGGAG<br>GAG | A   | Deletion      | frameshift_variant | HIGH     | <i>CALR</i>   | rs1555760738                                       | pathogenic                         | 35         |
| Twin_B     | 9   | 131860557  | T                                                                                             | A   | Substitution  | missense_variant   | MODERATE | <i>MED27</i>  |                                                    |                                    | 31         |
| Twin_B     | 10  | 24984824   | G                                                                                             | A   | Substitution  | missense_variant   | MODERATE | <i>ENKUR</i>  | rs200773323, COSV58633510                          | -                                  | 25.9       |
| Twin_B     | 12  | 88071791   | G                                                                                             | A   | Substitution  | missense_variant   | MODERATE | <i>CEP290</i> | rs761572735                                        | -                                  | 25.1       |
| Twin_B     | 14  | 62950522   | C                                                                                             | T   | Substitution  | missense_variant   | MODERATE | <i>KCNH5</i>  | rs587777164, CM1310653, COSV59758318, COSV59758899 | uncertain_significance, pathogenic | 28         |
| Twin_B     | 19  | 12943750   | AGCAG<br>AGGCT<br>TAAGG<br>AGGAG<br>GAAGA<br>AGACA<br>AGAAA<br>CGCAA<br>AGAGG<br>AGGAG<br>GAG | A   | Deletion      | frameshift_variant | HIGH     | <i>CALR</i>   | rs1555760738                                       | pathogenic                         | 35         |

Note: Gene names are provided in italics in accordance with the current HUGO Gene Nomenclature Committee (HGNC) guidelines.<sup>50</sup> \*An additional variant from the myeloid-gene panel is also included for Twin A (marked with an asterisk). This is a variant detected in the targeted myeloid-gene panel sequencing but with no high-confidence support from whole genome sequencing data; therefore, it was excluded from the downstream analysis.

**Supplementary Table 5. Data for time to the most recent common ancestor (MRCA) estimation**

| <b>(a) Using N[C&gt;T]pG mutation count data</b>                                                               |        |         |      |                               |                               |           |        |
|----------------------------------------------------------------------------------------------------------------|--------|---------|------|-------------------------------|-------------------------------|-----------|--------|
|                                                                                                                | mean   | se_mean | SD   | 95%_CI_lower_confidence_limit | 95%_CI_upper_confidence_limit | n_eff     | Rhat   |
| t <sub>MRCA</sub>                                                                                              | 0.95   | 0.00    | 0.54 | 0.20                          | 2.25                          | 287761.60 | 1.0000 |
| t[1]                                                                                                           | 2.80   | 0.00    | 0.15 | 2.453                         | 2.99                          | 211004.80 | 1.0000 |
| t[2]                                                                                                           | 31.87  | 0.01    | 3.37 | 25.329                        | 38.16                         | 188785.40 | 1.0000 |
| rate                                                                                                           | 36.69  | 0.00    | 1.93 | 32.035                        | 39.30                         | 294264.00 | 1.0000 |
| lp__                                                                                                           | 732.06 | 0.01    | 1.64 | 727.945                       | 734.12                        | 106813.70 | 1.0000 |
| Bridge sampling estimate of the log marginal likelihood: -10.93478; Relative Mean-Squared Error: 1.756122e-06. |        |         |      |                               |                               |           |        |
| <b>(b) Using lineage-restricted SNV count data</b>                                                             |        |         |      |                               |                               |           |        |
|                                                                                                                | mean   | se_mean | SD   | 95%_CI_lower_confidence_limit | 95%_CI_upper_confidence_limit | n_eff     | Rhat   |
| t <sub>MRCA</sub>                                                                                              | 2.16   | 0.00    | 0.98 | 0.61                          | 4.37                          | 78069.74  | 1.0000 |
| t[1]                                                                                                           | 4.12   | 0.01    | 2.06 | 2.427                         | 9.95                          | 44277.66  | 1.0001 |
| t[2]                                                                                                           | 25.22  | 0.03    | 7.53 | 9.059                         | 36.49                         | 51312.44  | 1.0000 |
| rate                                                                                                           | 24.97  | 0.03    | 7.50 | 8.952                         | 36.41                         | 51542.02  | 1.0000 |
| lp__                                                                                                           | 644.68 | 0.01    | 1.65 | 640.584                       | 646.79                        | 77872.47  | 1.0001 |
| Bridge sampling estimate of the log marginal likelihood: -9.01966; Relative Mean-Squared Error: 9.335533e-06.  |        |         |      |                               |                               |           |        |

Note: t<sub>MRCA</sub> is an estimate of time (years) between fertilization and the branch point of MPN lineages in twin A and B. t[1] and t[2] are estimates of the time (years) to the MRCA of cells in twin A and twin B. lp\_\_ corresponds to the logarithm of the (unnormalized) posterior density as calculated by Stan. n\_eff is a crude measure of effective sample size and 'Rhat' is the potential scale reduction factor on split chains (Rhat=1 at convergence). se\_mean is the estimated standard error of the mean of the simulations. rate is the (a) N[C>T]pG (b) clonal mutation rate per genome per year. SNV, single-nucleotide variant.

**Supplementary Table 6. Summary of the shared somatic variants and unique somatic variants for each twin, used in whole genome sequencing validation at the single-cell level**

| Variant studied         | Chr | Pos       | Ref                                                                       | Alt | Mutation_type | Annotation              | Nearest_gene      | Existing_variation | VAF_Twin_A | VAF_Twin_B |
|-------------------------|-----|-----------|---------------------------------------------------------------------------|-----|---------------|-------------------------|-------------------|--------------------|------------|------------|
| somatic_shared          | 19  | 12943750  | AGCAGAGGC<br>TTAAGGAGG<br>AGGAAGAAG<br>ACAAGAAAC<br>GCAAAGAGG<br>AGGAGGAG | A   | Deletion      | frameshift_variant      | <i>CALR</i>       | rs1555760738       | -          | -          |
| somatic_shared_1        | 1   | 237523679 | G                                                                         | A   | Substitution  | intron_variant          | <i>RYR2</i>       | rs1165384474       | 0.32       |            |
| somatic_shared_2        | 2   | 236024598 | A                                                                         | G   | Substitution  | intron_variant          | <i>AGAP1</i>      | -                  | 0.41       |            |
| somatic_shared_3        | 3   | 187366417 | G                                                                         | A   | Substitution  | upstream_gene_variant   |                   | -                  | 0.39       |            |
| somatic_shared_4        | 16  | 85313584  | C                                                                         | A   | Substitution  | downstream_gene_variant | <i>AC092275.1</i> | rs1483404740       | 0.36       |            |
| somatic_unique_Twin_A_1 | 10  | 18976904  | C                                                                         | T   | Substitution  | Intergenic_variant      |                   | rs181225799        | 0.31       | NA         |
| somatic_unique_Twin_A_2 | 11  | 78991748  | C                                                                         | T   | Substitution  | intron_variant          | <i>TENM4</i>      | .                  | 0.29       | NA         |
| somatic_unique_Twin_B_1 | 7   | 116155279 | G                                                                         | C   | Substitution  | intergenic_variant      |                   | rs1461424202       | NA         | 0.19       |
| somatic_unique_Twin_B_2 | 8   | 20863668  | T                                                                         | A   | Substitution  | intergenic_variant      |                   | -                  | NA         | 0.23       |

Note: Gene names are provided in italics in accordance with the current HUGO Gene Nomenclature Committee (HGNC) guidelines.<sup>50</sup> VAF, variant allele frequency.

**Supplementary Table 7. Overview of patient clinical information for the *JAK2V617F*-mutant myeloproliferative neoplasm cohort**

| Sample | Gender | MPN Dx | Age at Dx (years) | Driver mutation  | Driver mutation VAF at Dx (%) | BMAT | Cytogenetics      | NGS myeloid-gene panel | <i>JAK2V617F</i> detection on DBS (Y/N) |
|--------|--------|--------|-------------------|------------------|-------------------------------|------|-------------------|------------------------|-----------------------------------------|
| DBS_1  | Female | SM     | 31.9              | <i>KITD816V</i>  | NK                            | SM   | NA                | Nil else               | N                                       |
| DBS_2  | Male   | PV     | 28.9              | <i>JAK2V617F</i> | 16.0                          | NA   | NA                | NA                     | N                                       |
| DBS_3  | Female | PV     | 32.7              | <i>JAK2V617F</i> | 65.0                          | PV   | Normal; 46,XX[20] | Nil else               | N                                       |
| DBS_4  | Male   | PV     | 34.1              | <i>JAK2V617F</i> | 28.0                          | NA   | NA                | Nil else               | Y                                       |

Note: Gene names are provided in italics in accordance with the current HUGO Gene Nomenclature Committee (HGNC) guidelines.<sup>50</sup> BMAT, bone marrow aspirate and trephine; DBS, neonatal dried blood spot; Dx, diagnosis; MPN, myeloproliferative neoplasm; NGS, next-generation sequencing; NK, not known; PV, polycythemia vera; SM, systemic mastocytosis; VAF, variant allele frequency.

**Supplementary Table 8. Flow cytometry and cell sorting panels used in granulocyte, T cell and HSPC analysis and sorting**

| <b>(a) Granulocyte panel</b>                                                           |                                                 |                                   |                         |                              |                         |
|----------------------------------------------------------------------------------------|-------------------------------------------------|-----------------------------------|-------------------------|------------------------------|-------------------------|
| <b>Antigen</b>                                                                         | <b>Clone</b>                                    | <b>Conjugate</b>                  | <b>Dilution</b>         | <b>Company</b>               | <b>Catalogue_number</b> |
| CD3                                                                                    | SK7                                             | FITC                              | 5:100                   | BD Biosciences <sup>§</sup>  | 345763                  |
| CD34                                                                                   | 4HI1                                            | APC-eFluor <sup>®</sup> 780       | 2:100                   | eBioscience <sup>™#</sup>    | 47-0349-42              |
| CD71                                                                                   | M-A712                                          | Alexa Fluor <sup>®</sup> 700      | 5:100                   | BD Biosciences <sup>§</sup>  | 563769                  |
| CD19                                                                                   | HIB19                                           | V450                              | 5:100                   | BD Biosciences <sup>§</sup>  | 560354                  |
| 7AAD (7-Aminoactinomycin D)                                                            |                                                 |                                   | 1:100*                  | Cayman Chemical <sup>†</sup> | 11397                   |
| CD11b                                                                                  | ICRF44                                          | APC                               | 5:100                   | eBioscience <sup>™#</sup>    | 17-0118-42              |
| CD14                                                                                   | 61D3                                            | APC                               | 5:100                   | eBioscience <sup>™#</sup>    | 17-0149-42              |
| CD33                                                                                   | WM53                                            | PE                                | 5:100                   | BioLegend <sup>‡</sup>       | 303404                  |
| <b>(b) T cell panel</b>                                                                |                                                 |                                   |                         |                              |                         |
| <b>Antigen</b>                                                                         | <b>Clone</b>                                    | <b>Conjugate</b>                  | <b>Dilution</b>         | <b>Company</b>               | <b>Catalogue_number</b> |
| CD3                                                                                    | SK7                                             | FITC                              | 5:100                   | BD Biosciences <sup>§</sup>  | 345763                  |
| CD4                                                                                    | SK3                                             | APC                               | 5:100                   | BD Pharmingen <sup>™§</sup>  | 565994                  |
| DAPI (4',6-Diamidino-2-Phenylindole, Dilactate)                                        |                                                 |                                   | 1:100*                  | Invitrogen <sup>™#</sup>     | D3571                   |
| CD19                                                                                   | HIB19                                           | APC-Cyanine7                      | 5:100                   | BioLegend <sup>‡</sup>       | 302218                  |
| CD11b                                                                                  | ICRF44                                          | PE-Cyanine5                       | 5:100                   | BioLegend <sup>‡</sup>       | 301308                  |
| CD14                                                                                   | 61D3                                            | PE-Cyanine5                       | 5:100                   | eBioscience <sup>™#</sup>    | 15-0149-42              |
| <b>(c) HSPC panel</b>                                                                  |                                                 |                                   |                         |                              |                         |
| <b>Antigen</b>                                                                         | <b>Clone</b>                                    | <b>Conjugate</b>                  | <b>Dilution</b>         | <b>Company</b>               | <b>Catalogue_number</b> |
| CD34                                                                                   | 4HI1                                            | APC-eFluor <sup>®</sup> 780       | 0.66:100                | eBioscience <sup>™#</sup>    | 47-0349-42              |
| CD38                                                                                   | HIT2                                            | PE-Texas Red <sup>®</sup>         | 4.66:100                | Invitrogen <sup>™#</sup>     | MHCD3817                |
| CD45RA                                                                                 | HI100                                           | PE                                | 0.66:100                | BioLegend <sup>‡</sup>       | 304108                  |
| CD90                                                                                   | 5E10                                            | Brilliant Violet 421 <sup>™</sup> | 3.33:100                | BioLegend <sup>‡</sup>       | 328122                  |
| CD123                                                                                  | 6H6                                             | PE-Cyanine7                       | 1.66:100                | BioLegend <sup>‡</sup>       | 306010                  |
| 7AAD (7-Aminoactinomycin D)                                                            |                                                 |                                   | 1:100*                  | Cayman Chemical <sup>†</sup> | 11397                   |
| Lineage mix                                                                            |                                                 |                                   | 21.66:100               |                              |                         |
| CD8a <sup>^</sup>                                                                      | RPA-T8                                          | FITC                              | 1:100 of Lineage mix    | BioLegend <sup>‡</sup>       | 301006                  |
| CD10 <sup>^</sup>                                                                      | HI10a                                           | FITC                              | 3.33:100 of Lineage mix | BioLegend <sup>‡</sup>       | 312208                  |
| CD20 <sup>^</sup>                                                                      | 2H7                                             | FITC                              | 0.66:100 of Lineage mix | BioLegend <sup>‡</sup>       | 302304                  |
| CD66b <sup>^</sup>                                                                     | G10F5                                           | FITC                              | 6.66:100 of Lineage mix | BioLegend <sup>‡</sup>       | 305104                  |
| CD127 <sup>^</sup>                                                                     | eBioRDR5                                        | FITC                              | 3.33:100 of Lineage mix | eBioscience <sup>™#</sup>    | 11-1278-52              |
| Human Hematopoietic Lineage Cocktail (CD2, CD3, CD14, CD16, CD56, CD235a) <sup>^</sup> | RPA-2.10, OKT3, 61D3, CB16, HIB19, TULY56, HIR2 | FITC                              | 6.66:100 of Lineage mix | eBioscience <sup>™#</sup>    | 22-7778-72              |

\*Viability stains were previously diluted 1:200 for 7-AAD and 1:100 for DAPI from their 5mg/ml stock solutions. <sup>^</sup>Lineage mix. <sup>§</sup>Becton, Dickinson and Company, Franklin Lakes, US-NJ; <sup>#</sup>Thermo Fisher Scientific Inc., Waltham, US-MA; <sup>†</sup>Cayman Chemical Company, Ann Arbor, US-MI; <sup>‡</sup>BioLegend, San Diego, US-CA. HSPC, hematopoietic stem and progenitor cell.



## Supplementary Table 9. Catalogue of oligonucleotides used in the polymerase chain

### reaction assays

| Target nucleotide(s)   | Nearest gene      | Forward primer sequence (5' → 3') | Reverse primer sequence (5' → 3') | Probe sequence                                   | Product size (bp) | Company                  |
|------------------------|-------------------|-----------------------------------|-----------------------------------|--------------------------------------------------|-------------------|--------------------------|
| chr19:12943750-1294801 | <i>CALR</i>       | GCAGCAGAGAAACAAATG                | GCCTCTCTACAGCTCGTCCTT             |                                                  | 207               | Invitrogen™              |
| chr4:105234449         | <i>TET2</i>       | ACGTAACTTCGGGGTAAGCC              | TCCACGGAAGAGGCAGAAAC              |                                                  | 291               | Invitrogen™              |
| chr4:105259633         | <i>TET2</i>       | tgtgtggttatgccacagctt             | acatcaggaagtaaacaaacCTCT          |                                                  | 312               | Invitrogen™              |
| chr1:237523679         | <i>RYR2</i>       | ccagctgggagagaatattgtga           | ggagctgctaaaggattatctgc           |                                                  | 1300              | Invitrogen™              |
| chr2:236024598         | <i>AGAP1</i>      | ttgtcctttccccagacc                | catgaatccgggctgtcaaac             |                                                  | 259               | Invitrogen™              |
| chr3:187366417         | –                 | gaatttaagccccaggagaca             | ccagtgctcagaggaaccgtag            |                                                  | 268               | Invitrogen™              |
| chr16:85313584         | <i>AC092275.1</i> | tccagcgtgatccgtgttt               | ttctgaccgccagactttg               |                                                  | 346               | Invitrogen™              |
| chr10:18976904         | –                 | aactcaaccttgccccatc               | ctttccctcccactgacaca              |                                                  | 213               | Invitrogen™              |
| chr11:78991748         | <i>TENM4</i>      | gcacttgtgaatgcttgtgc              | ggtctggcccacatttct                |                                                  | 390               | Invitrogen™              |
| chr7:116155279         | –                 | ttctagcccctgctatgcac              | ggcccaatggcacagtaaga              |                                                  | 452               | Invitrogen™              |
| chr8:20863668          | –                 | gccttcgattgggctgttta              | aaggggttctctccagcaaa              |                                                  | 441               | Invitrogen™              |
| chr9:5073770           | <i>JAK2</i>       | aggcttacacaggggttcc               | ttgttggcattgtaacctc               |                                                  | 505               | Life Technologies™       |
| chr9:5073770           | <i>JAK2</i>       | GCTTTCTCACAAGCATTG                | gcattagaagcctgtagttta             |                                                  | 84                | Thermo Fisher Scientific |
| chr9:5073770(G)        | <i>JAK2</i>       |                                   |                                   | [HEX]TCGTCTCCACAGACACA<br>TACTCCATGAGACGA[BHQ1]  |                   | Merck                    |
| chr9:5073770(T)        | <i>JAK2</i>       |                                   |                                   | [6FAM]TCGTCTCCACAGAAAC<br>ATACTCCATGAGACGA[BHQ1] |                   | Merck                    |

Note: All target coordinates according to the Genome Reference Consortium Human Build 38 (GRCh38). All primers were checked against RefSeq and human genome assembly databases using NCBI Primer-BLAST® (National Library of Medicine, Bethesda, US-MD) as well as SnapGene® Viewer, v5.3 (GSL Biotech LLC, Chicago, US-IL). The ddPCR assay probes were labelled with HEX and FAM for wild-type *JAK2* and the NM\_004972.3[*JAK2*]:c.1849G>T p.V617F, respectively. Gene names are provided in italics in accordance with the current HUGO Gene Nomenclature Committee guidelines.<sup>50</sup> Uppercase letters are used for exonic regions, while lowercase letters represent intronic regions. Invitrogen™, Life Technologies™, Thermo Fisher Scientific: Thermo Fisher Scientific, Waltham, US-MA; Merck: Merck Group, Darmstadt, DE. ddPCR, droplet digital polymerase chain reaction.

**Supplementary Table 10. Catalogue of the genes targeted in the next-generation sequencing panel**

| Gene           | RefSeq_accession_number                             |
|----------------|-----------------------------------------------------|
| <i>ABL1</i>    | NM_005157; NM_007313                                |
| <i>ANKRD26</i> | NM_001256053; NM_014915                             |
| <i>ASXL1</i>   | NM_015338                                           |
| <i>ATRX</i>    | NM_000489                                           |
| <i>BCOR</i>    | NM_001123383; NM_017745                             |
| <i>BCORL1</i>  | NM_021946; NM_001184772                             |
| <i>BRAF</i>    | NM_004333                                           |
| <i>BRCC3</i>   | NM_024332                                           |
| <i>CALR</i>    | NM_004343                                           |
| <i>CBL</i>     | NM_005188                                           |
| <i>CBLB</i>    | NM_170662                                           |
| <i>CBLC</i>    | NM_012116                                           |
| <i>CDKN2A</i>  | NM_001195132; NM_000077; NM_058195                  |
| <i>CEBPA</i>   | NM_004364                                           |
| <i>CHEK2</i>   | NM_001005735; NM_007194                             |
| <i>CSF3R</i>   | NM_156039                                           |
| <i>CUX1</i>    | NM_001202543; NM_181552                             |
| <i>DDX41</i>   | NM_016222                                           |
| <i>DNMT3A</i>  | NM_022552; NM_175629                                |
| <i>ETV6</i>    | NM_001987                                           |
| <i>EZH2</i>    | NM_004456                                           |
| <i>FBXW7</i>   | NM_033632; NM_018315                                |
| <i>FLT3</i>    | NM_004119                                           |
| <i>GATA1</i>   | NM_002049                                           |
| <i>GATA2</i>   | NM_032638; NM_001145661                             |
| <i>GNAS</i>    | NM_000516; NM_001077490                             |
| <i>HRAS</i>    | NM_005343; NM_001130442                             |
| <i>IDH1</i>    | NM_005896; NM_001282386; NM_001282387               |
| <i>IDH2</i>    | NM_002168                                           |
| <i>IKZF1</i>   | NM_001220765; NM_006060                             |
| <i>JAK2</i>    | NM_004972; NM_001322194; NM_001322195; NM_001322196 |
| <i>JAK3</i>    | NM_000215                                           |
| <i>KDM6A</i>   | NM_021140                                           |
| <i>KIT</i>     | NM_000222                                           |
| <i>KRAS</i>    | NM_033360                                           |
| <i>KMT2A</i>   | NM_001197104; NM_005933                             |
| <i>MPL</i>     | NM_005373                                           |
| <i>MYD88</i>   | NM_001172567                                        |

|               |                                       |
|---------------|---------------------------------------|
| <i>NF1</i>    | NM_000267                             |
| <i>NFE2</i>   | NM_001136023; NM_001261461; NM_006163 |
| <i>NOTCH1</i> | NM_017617                             |
| <i>NPM1</i>   | NM_002520; NM_001355006               |
| <i>NRAS</i>   | NM_002524                             |
| <i>PDGFRA</i> | NM_006206                             |
| <i>PHF6</i>   | NM_032458; NM_001015877               |
| <i>PPM1D</i>  | NM_003620                             |
| <i>PTEN</i>   | NM_000314                             |
| <i>PTPN11</i> | NM_002834                             |
| <i>RAD21</i>  | NM_006265                             |
| <i>RUNX1</i>  | NM_001754                             |
| <i>SETBP1</i> | NM_015559                             |
| <i>SETD2</i>  | NM_014159                             |
| <i>SETDB1</i> | NM_001145415                          |
| <i>SF3B1</i>  | NM_012433                             |
| <i>SH2B3</i>  | NM_005475                             |
| <i>SMC1A</i>  | NM_006306                             |
| <i>SMC3</i>   | NM_005445                             |
| <i>SRSF2</i>  | NM_001195427; NM_003016               |
| <i>STAG1</i>  | NM_005862                             |
| <i>STAG2</i>  | NM_001042749; NM_006603; NM_001282418 |
| <i>STAT3</i>  | NM_139276                             |
| <i>STAT5B</i> | NM_012448                             |
| <i>TET2</i>   | NM_001127208                          |
| <i>TP53</i>   | NM_000546; NM_001126112               |
| <i>U2AF1</i>  | NM_001025203                          |
| <i>WT1</i>    | NM_024426                             |
| <i>ZRSR2</i>  | NM_005089                             |

Note: Gene names are provided in italics in accordance with the current HUGO Gene Nomenclature Committee (HGNC) guidelines.<sup>50</sup>

**Supplementary Table 11. Summary of multidimensional mutation clustering**

| <b>(a) Summary of mutation assignments</b> |                      |                       |                                  |                                  |
|--------------------------------------------|----------------------|-----------------------|----------------------------------|----------------------------------|
| <b>Cluster_no</b>                          | <b>CCF_in_Twin_A</b> | <b>CCF_in_Twin_B</b>  | <b>Estimated_no_of_mutations</b> | <b>No_of_mutations_assigned</b>  |
| 1                                          | 0.000                | 0.315                 | 452.348                          | 452                              |
| 2                                          | 0.359                | 0.000                 | 425.794                          | 426                              |
| 3                                          | 0.898                | 1.003                 | 9.859                            | 10                               |
| <b>(b) Individual mutation assignments</b> |                      |                       |                                  |                                  |
| <b>Most_likely_cluster</b>                 | <b>Chr</b>           | <b>Mutation_start</b> | <b>Twin_A_Subclonal_Fraction</b> | <b>Twin_B_Subclonal_Fraction</b> |
| 1                                          | 1                    | 104033383             | 0.000                            | 0.300                            |
| 2                                          | 1                    | 106288464             | 0.254                            | 0.000                            |
| 1                                          | 1                    | 110190300             | 0.000                            | 0.674                            |
| 1                                          | 1                    | 110738023             | 0.000                            | 0.434                            |
| 2                                          | 1                    | 111854251             | 0.167                            | 0.000                            |
| 2                                          | 1                    | 112723366             | 0.444                            | 0.000                            |
| 1                                          | 1                    | 114307529             | 0.000                            | 0.271                            |
| 1                                          | 1                    | 12823937              | 0.000                            | 0.271                            |
| 1                                          | 1                    | 143898748             | 0.000                            | 0.643                            |
| 1                                          | 1                    | 147277076             | 0.000                            | 0.362                            |
| 2                                          | 1                    | 152011365             | 0.291                            | 0.000                            |
| 2                                          | 1                    | 152568644             | 0.444                            | 0.000                            |
| 2                                          | 1                    | 155442289             | 0.342                            | 0.044                            |
| 2                                          | 1                    | 155643901             | 0.838                            | 0.000                            |
| 1                                          | 1                    | 157062690             | 0.000                            | 0.251                            |
| 1                                          | 1                    | 158329018             | 0.000                            | 0.643                            |
| 1                                          | 1                    | 159742120             | 0.000                            | 0.334                            |
| 2                                          | 1                    | 164325871             | 0.392                            | 0.000                            |
| 1                                          | 1                    | 165976313             | 0.000                            | 0.181                            |
| 1                                          | 1                    | 166242296             | 0.000                            | 0.322                            |
| 2                                          | 1                    | 172874706             | 0.296                            | 0.000                            |
| 2                                          | 1                    | 173897024             | 0.272                            | 0.000                            |
| 1                                          | 1                    | 175165067             | 0.000                            | 0.241                            |
| 1                                          | 1                    | 176214397             | 0.000                            | 0.470                            |
| 1                                          | 1                    | 177128801             | 0.000                            | 0.478                            |
| 2                                          | 1                    | 17778871              | 0.190                            | 0.000                            |
| 2                                          | 1                    | 178136491             | 0.747                            | 0.000                            |
| 2                                          | 1                    | 185587702             | 0.644                            | 0.000                            |
| 2                                          | 1                    | 185717034             | 0.533                            | 0.000                            |
| 1                                          | 1                    | 187326523             | 0.000                            | 0.217                            |
| 2                                          | 1                    | 188790583             | 0.491                            | 0.000                            |
| 1                                          | 1                    | 190010459             | 0.000                            | 0.507                            |

|   |   |           |       |       |
|---|---|-----------|-------|-------|
| 2 | 1 | 19011134  | 0.508 | 0.000 |
| 2 | 1 | 190678569 | 0.503 | 0.000 |
| 2 | 1 | 191963370 | 0.471 | 0.000 |
| 1 | 1 | 194805882 | 0.000 | 0.329 |
| 1 | 1 | 1948293   | 0.000 | 0.592 |
| 2 | 1 | 196771008 | 0.667 | 0.000 |
| 2 | 1 | 199078846 | 0.368 | 0.101 |
| 1 | 1 | 211364253 | 0.000 | 0.247 |
| 1 | 1 | 21195179  | 0.000 | 0.931 |
| 1 | 1 | 216808720 | 0.000 | 0.310 |
| 2 | 1 | 218758531 | 0.410 | 0.000 |
| 1 | 1 | 228759153 | 0.000 | 0.724 |
| 1 | 1 | 231661954 | 0.000 | 0.310 |
| 1 | 1 | 239287292 | 0.000 | 0.140 |
| 1 | 1 | 239790569 | 0.000 | 0.354 |
| 3 | 1 | 54128162  | 0.966 | 0.909 |
| 1 | 1 | 57203495  | 0.000 | 0.322 |
| 2 | 1 | 58846527  | 0.500 | 0.000 |
| 1 | 1 | 68690432  | 0.000 | 0.869 |
| 2 | 1 | 81244570  | 0.339 | 0.000 |
| 2 | 1 | 82141981  | 0.267 | 0.043 |
| 1 | 1 | 90494264  | 0.000 | 0.661 |
| 2 | 1 | 91064439  | 1.191 | 0.000 |
| 2 | 1 | 91598893  | 0.410 | 0.000 |
| 2 | 1 | 93828702  | 0.654 | 0.310 |
| 1 | 2 | 103642003 | 0.000 | 0.194 |
| 1 | 2 | 104572208 | 0.000 | 0.078 |
| 2 | 2 | 105464070 | 0.291 | 0.000 |
| 1 | 2 | 110152812 | 0.000 | 0.350 |
| 1 | 2 | 112972342 | 0.000 | 0.212 |
| 2 | 2 | 113030007 | 0.632 | 0.000 |
| 1 | 2 | 113360949 | 0.000 | 0.000 |
| 1 | 2 | 114347202 | 0.000 | 0.000 |
| 2 | 2 | 11568288  | 0.182 | 0.263 |
| 1 | 2 | 122468457 | 0.000 | 0.000 |
| 2 | 2 | 122548088 | 0.333 | 0.496 |
| 2 | 2 | 124139117 | 0.288 | 0.000 |
| 2 | 2 | 12436887  | 0.381 | 0.207 |
| 1 | 2 | 124707645 | 0.000 | 0.000 |
| 1 | 2 | 125662877 | 0.000 | 0.217 |
| 2 | 2 | 126802154 | 0.453 | 0.000 |
| 2 | 2 | 13111603  | 0.427 | 0.000 |

|   |   |           |       |       |
|---|---|-----------|-------|-------|
| 2 | 2 | 135703624 | 0.308 | 0.217 |
| 1 | 2 | 136809746 | 0.000 | 0.601 |
| 1 | 2 | 139215973 | 0.000 | 0.651 |
| 2 | 2 | 139236448 | 0.356 | 0.290 |
| 1 | 2 | 139897503 | 0.000 | 0.000 |
| 2 | 2 | 140606025 | 0.522 | 0.000 |
| 2 | 2 | 142582383 | 0.140 | 0.362 |
| 1 | 2 | 142622241 | 0.000 | 0.142 |
| 2 | 2 | 145569408 | 0.381 | 0.217 |
| 2 | 2 | 145603291 | 0.200 | 0.371 |
| 1 | 2 | 147580489 | 0.000 | 0.000 |
| 2 | 2 | 148242718 | 0.444 | 0.496 |
| 1 | 2 | 14870316  | 0.000 | 0.000 |
| 2 | 2 | 153181357 | 0.533 | 0.383 |
| 1 | 2 | 156749565 | 0.000 | 0.231 |
| 1 | 2 | 158735231 | 0.000 | 0.000 |
| 2 | 2 | 163100502 | 0.395 | 0.054 |
| 2 | 2 | 167809460 | 0.281 | 0.416 |
| 2 | 2 | 174496556 | 0.471 | 0.000 |
| 2 | 2 | 175727129 | 0.556 | 0.000 |
| 2 | 2 | 17632861  | 0.054 | 0.000 |
| 1 | 2 | 17816780  | 0.000 | 0.189 |
| 2 | 2 | 181542157 | 0.222 | 0.000 |
| 1 | 2 | 181754253 | 0.000 | 0.290 |
| 2 | 2 | 184966    | 0.519 | 0.000 |
| 1 | 2 | 186809029 | 0.000 | 0.000 |
| 1 | 2 | 187978655 | 0.000 | 0.434 |
| 1 | 2 | 190310023 | 0.000 | 0.290 |
| 2 | 2 | 193562677 | 0.533 | 0.117 |
| 2 | 2 | 19486986  | 0.494 | 0.000 |
| 2 | 2 | 196497946 | 0.344 | 0.000 |
| 1 | 2 | 197588962 | 0.000 | 0.354 |
| 2 | 2 | 199505098 | 0.296 | 0.449 |
| 2 | 2 | 199984230 | 0.317 | 0.000 |
| 2 | 2 | 200975338 | 0.333 | 0.434 |
| 1 | 2 | 202941148 | 0.000 | 0.000 |
| 1 | 2 | 214886582 | 0.000 | 0.695 |
| 1 | 2 | 215762883 | 0.000 | 0.062 |
| 1 | 2 | 21701231  | 0.000 | 0.000 |
| 2 | 2 | 217649629 | 0.533 | 0.620 |
| 1 | 2 | 22021980  | 0.000 | 0.000 |
| 1 | 2 | 220248897 | 0.000 | 0.455 |

|   |   |           |       |       |
|---|---|-----------|-------|-------|
| 2 | 2 | 221924308 | 0.406 | 0.248 |
| 1 | 2 | 222991555 | 0.000 | 0.197 |
| 1 | 2 | 22585137  | 0.000 | 0.465 |
| 1 | 2 | 22585139  | 0.000 | 0.571 |
| 1 | 2 | 226321782 | 0.000 | 0.000 |
| 2 | 2 | 227692889 | 0.325 | 0.000 |
| 1 | 2 | 22994571  | 0.000 | 0.462 |
| 2 | 2 | 235048421 | 0.421 | 0.395 |
| 2 | 2 | 235142193 | 0.133 | 0.347 |
| 3 | 2 | 236024598 | 1.259 | 0.597 |
| 2 | 2 | 236165626 | 0.417 | 0.494 |
| 1 | 2 | 238340846 | 0.000 | 0.265 |
| 1 | 2 | 238788248 | 0.000 | 0.000 |
| 1 | 2 | 24019295  | 0.000 | 0.000 |
| 2 | 2 | 24266260  | 0.533 | 0.176 |
| 2 | 2 | 25819904  | 0.351 | 0.698 |
| 1 | 2 | 27314362  | 0.000 | 0.300 |
| 1 | 2 | 28287298  | 0.000 | 0.000 |
| 1 | 2 | 29298533  | 0.000 | 0.000 |
| 2 | 2 | 2982012   | 0.444 | 0.000 |
| 2 | 2 | 29907671  | 0.184 | 0.400 |
| 2 | 2 | 31671794  | 0.320 | 0.000 |
| 1 | 2 | 33204005  | 0.000 | 0.000 |
| 1 | 2 | 34609950  | 0.000 | 0.229 |
| 2 | 2 | 35209815  | 0.222 | 0.261 |
| 1 | 2 | 39543295  | 0.000 | 0.000 |
| 1 | 2 | 41851787  | 0.000 | 0.338 |
| 2 | 2 | 5026216   | 0.454 | 0.000 |
| 1 | 2 | 5809965   | 0.000 | 0.000 |
| 1 | 2 | 76343534  | 0.000 | 0.000 |
| 1 | 2 | 77138659  | 0.000 | 0.000 |
| 1 | 2 | 77305966  | 0.000 | 0.000 |
| 2 | 2 | 78265814  | 0.356 | 0.000 |
| 1 | 2 | 7937210   | 0.000 | 0.106 |
| 1 | 2 | 79741961  | 0.000 | 0.000 |
| 1 | 2 | 84976628  | 0.000 | 0.606 |
| 2 | 2 | 90026936  | 0.866 | 0.362 |
| 2 | 2 | 98022727  | 0.364 | 0.302 |
| 1 | 3 | 101873401 | 0.000 | 0.000 |
| 2 | 3 | 103475498 | 0.808 | 0.253 |
| 2 | 3 | 107699193 | 0.571 | 0.511 |
| 1 | 3 | 107880323 | 0.000 | 0.000 |

|   |   |           |       |       |
|---|---|-----------|-------|-------|
| 1 | 3 | 111393544 | 0.000 | 0.371 |
| 2 | 3 | 118298534 | 0.296 | 0.000 |
| 1 | 3 | 120551312 | 0.000 | 0.494 |
| 1 | 3 | 124318634 | 0.000 | 0.000 |
| 2 | 3 | 1259968   | 0.390 | 0.308 |
| 2 | 3 | 126102405 | 0.356 | 0.368 |
| 1 | 3 | 127184194 | 0.000 | 0.064 |
| 1 | 3 | 146968300 | 0.000 | 0.000 |
| 1 | 3 | 148123392 | 0.000 | 0.465 |
| 1 | 3 | 150872501 | 0.000 | 0.352 |
| 1 | 3 | 152516100 | 0.000 | 0.000 |
| 2 | 3 | 152974761 | 0.392 | 0.111 |
| 2 | 3 | 153068733 | 0.491 | 0.339 |
| 2 | 3 | 153706759 | 0.340 | 0.217 |
| 1 | 3 | 157178549 | 0.000 | 0.390 |
| 2 | 3 | 160115640 | 0.578 | 0.310 |
| 1 | 3 | 169022850 | 0.000 | 0.225 |
| 1 | 3 | 182077482 | 0.000 | 0.334 |
| 3 | 3 | 187366417 | 1.333 | 0.000 |
| 1 | 3 | 192580552 | 0.000 | 0.000 |
| 1 | 3 | 197965767 | 0.000 | 0.000 |
| 2 | 3 | 26440532  | 0.267 | 0.000 |
| 2 | 3 | 29763656  | 0.216 | 0.339 |
| 2 | 3 | 32019778  | 0.342 | 0.420 |
| 2 | 3 | 32526653  | 0.610 | 0.000 |
| 1 | 3 | 39756857  | 0.000 | 0.229 |
| 1 | 3 | 50879771  | 0.000 | 0.000 |
| 1 | 3 | 52975648  | 0.000 | 0.140 |
| 1 | 3 | 54092594  | 0.000 | 0.000 |
| 1 | 3 | 57095586  | 0.000 | 0.140 |
| 1 | 3 | 59401686  | 0.000 | 0.000 |
| 2 | 3 | 59893891  | 0.242 | 0.000 |
| 1 | 3 | 62217141  | 0.000 | 0.000 |
| 1 | 3 | 6268058   | 0.000 | 0.310 |
| 2 | 3 | 65074311  | 0.702 | 0.310 |
| 2 | 3 | 72405852  | 0.566 | 0.434 |
| 1 | 3 | 74463202  | 0.000 | 0.000 |
| 2 | 3 | 74980380  | 0.229 | 0.376 |
| 2 | 3 | 76086971  | 0.305 | 0.597 |
| 2 | 3 | 80858231  | 0.508 | 0.326 |
| 1 | 3 | 8179865   | 0.000 | 0.661 |
| 1 | 3 | 8330619   | 0.000 | 0.000 |



|   |   |           |       |       |
|---|---|-----------|-------|-------|
| 1 | 3 | 84248079  | 0.000 | 0.241 |
| 2 | 3 | 86921756  | 0.218 | 0.133 |
| 1 | 3 | 8749340   | 0.000 | 0.170 |
| 1 | 3 | 8766880   | 0.000 | 0.724 |
| 1 | 3 | 8800977   | 0.000 | 0.181 |
| 1 | 3 | 89748810  | 0.000 | 0.449 |
| 2 | 3 | 90430217  | 0.821 | 0.496 |
| 1 | 3 | 95223077  | 0.000 | 0.526 |
| 3 | 3 | 9646697   | 0.948 | 0.000 |
| 1 | 3 | 96820605  | 0.000 | 0.207 |
| 2 | 4 | 105234449 | 0.190 | 0.000 |
| 2 | 4 | 106394908 | 0.444 | 0.414 |
| 1 | 4 | 108394132 | 0.000 | 0.424 |
| 2 | 4 | 109876682 | 0.533 | 0.000 |
| 2 | 4 | 111359412 | 0.600 | 0.300 |
| 1 | 4 | 115259241 | 0.000 | 0.000 |
| 2 | 4 | 119161162 | 0.747 | 0.000 |
| 2 | 4 | 119833655 | 0.389 | 0.000 |
| 1 | 4 | 120599980 | 0.000 | 0.000 |
| 2 | 4 | 122600220 | 0.519 | 0.000 |
| 1 | 4 | 125617334 | 0.000 | 0.000 |
| 1 | 4 | 126647636 | 0.000 | 0.000 |
| 1 | 4 | 127771889 | 0.000 | 0.000 |
| 2 | 4 | 134850961 | 0.381 | 0.434 |
| 1 | 4 | 140154007 | 0.000 | 0.000 |
| 1 | 4 | 144879760 | 0.000 | 0.000 |
| 1 | 4 | 147616580 | 0.000 | 0.000 |
| 1 | 4 | 152098840 | 0.000 | 0.000 |
| 2 | 4 | 160621868 | 0.410 | 0.554 |
| 2 | 4 | 161252551 | 0.163 | 0.521 |
| 2 | 4 | 161288198 | 0.397 | 0.362 |
| 1 | 4 | 161716379 | 0.000 | 0.059 |
| 2 | 4 | 162816440 | 0.549 | 0.280 |
| 1 | 4 | 166613505 | 0.000 | 0.000 |
| 3 | 4 | 16908350  | 0.789 | 0.651 |
| 1 | 4 | 174170616 | 0.000 | 0.167 |
| 1 | 4 | 179639868 | 0.000 | 0.171 |
| 1 | 4 | 180135661 | 0.000 | 0.261 |
| 2 | 4 | 180265089 | 0.455 | 0.056 |
| 2 | 4 | 183453115 | 0.089 | 0.390 |
| 1 | 4 | 184638048 | 0.000 | 0.000 |
| 2 | 4 | 187661068 | 0.099 | 0.155 |

|   |   |           |       |       |
|---|---|-----------|-------|-------|
| 2 | 4 | 188628950 | 0.516 | 0.334 |
| 2 | 4 | 22103283  | 0.284 | 0.150 |
| 2 | 4 | 26343555  | 0.432 | 0.404 |
| 1 | 4 | 26875683  | 0.000 | 0.070 |
| 2 | 4 | 26935882  | 0.144 | 0.217 |
| 2 | 4 | 3011910   | 0.381 | 0.271 |
| 2 | 4 | 31169536  | 0.323 | 0.163 |
| 1 | 4 | 33615886  | 0.000 | 0.170 |
| 2 | 4 | 35852584  | 0.316 | 0.383 |
| 1 | 4 | 37418639  | 0.000 | 0.271 |
| 1 | 4 | 39429436  | 0.000 | 0.434 |
| 2 | 4 | 44413264  | 0.296 | 0.000 |
| 1 | 4 | 46668719  | 0.000 | 0.402 |
| 1 | 4 | 47220483  | 0.000 | 0.000 |
| 1 | 4 | 52190355  | 0.000 | 0.235 |
| 2 | 4 | 52545084  | 0.491 | 0.630 |
| 2 | 4 | 5718308   | 0.310 | 0.000 |
| 2 | 4 | 61895466  | 0.615 | 0.000 |
| 1 | 4 | 64216296  | 0.000 | 0.352 |
| 1 | 4 | 6451943   | 0.000 | 0.339 |
| 1 | 4 | 64665477  | 0.000 | 0.668 |
| 2 | 4 | 69630424  | 0.373 | 0.000 |
| 1 | 4 | 70520668  | 0.000 | 0.258 |
| 1 | 4 | 71648848  | 0.000 | 0.000 |
| 2 | 4 | 74668604  | 0.505 | 0.034 |
| 1 | 4 | 76047967  | 0.000 | 0.000 |
| 2 | 4 | 82531664  | 0.237 | 0.000 |
| 1 | 4 | 86440642  | 0.000 | 0.000 |
| 1 | 4 | 88387262  | 0.000 | 0.000 |
| 2 | 5 | 100034257 | 0.381 | 0.000 |
| 2 | 5 | 100071988 | 0.274 | 0.265 |
| 2 | 5 | 100155088 | 0.471 | 0.000 |
| 2 | 5 | 100295778 | 0.649 | 0.000 |
| 1 | 5 | 105561137 | 0.000 | 0.323 |
| 2 | 5 | 105941453 | 0.296 | 0.286 |
| 1 | 5 | 106685060 | 0.116 | 0.189 |
| 2 | 5 | 10937820  | 0.360 | 0.053 |
| 1 | 5 | 110479443 | 0.000 | 0.000 |
| 2 | 5 | 111449354 | 0.323 | 0.679 |
| 1 | 5 | 11361065  | 0.000 | 0.000 |
| 2 | 5 | 115666098 | 0.308 | 0.177 |
| 2 | 5 | 116208129 | 0.276 | 0.300 |

|   |   |           |       |       |
|---|---|-----------|-------|-------|
| 2 | 5 | 116797618 | 0.340 | 0.000 |
| 1 | 5 | 122619069 | 0.000 | 0.592 |
| 2 | 5 | 123223704 | 0.278 | 0.217 |
| 2 | 5 | 12387040  | 0.471 | 0.000 |
| 2 | 5 | 131362688 | 0.310 | 0.000 |
| 2 | 5 | 131622186 | 0.437 | 0.000 |
| 1 | 5 | 137416371 | 0.000 | 0.000 |
| 1 | 5 | 140836906 | 0.000 | 0.407 |
| 1 | 5 | 147046232 | 0.000 | 0.814 |
| 2 | 5 | 147611565 | 0.058 | 0.000 |
| 2 | 5 | 152460283 | 0.260 | 0.395 |
| 2 | 5 | 155157242 | 0.547 | 0.973 |
| 1 | 5 | 155317926 | 0.000 | 0.000 |
| 1 | 5 | 157005759 | 0.000 | 1.025 |
| 1 | 5 | 159980907 | 0.000 | 0.000 |
| 1 | 5 | 161395724 | 0.000 | 0.532 |
| 1 | 5 | 161830310 | 0.000 | 0.323 |
| 2 | 5 | 162912266 | 0.267 | 0.461 |
| 2 | 5 | 163087087 | 0.333 | 0.362 |
| 2 | 5 | 166031221 | 0.284 | 0.000 |
| 1 | 5 | 175182485 | 0.000 | 0.217 |
| 1 | 5 | 178484296 | 0.000 | 0.334 |
| 3 | 5 | 18474168  | 0.889 | 0.000 |
| 1 | 5 | 19703201  | 0.000 | 0.000 |
| 2 | 5 | 2114089   | 0.561 | 0.223 |
| 1 | 5 | 30228903  | 0.000 | 0.159 |
| 1 | 5 | 32183802  | 0.000 | 0.362 |
| 2 | 5 | 33779372  | 0.342 | 0.189 |
| 1 | 5 | 35163531  | 0.000 | 0.000 |
| 2 | 5 | 35831884  | 0.909 | 0.370 |
| 2 | 5 | 36636178  | 0.516 | 0.543 |
| 1 | 5 | 41232152  | 0.000 | 0.322 |
| 1 | 5 | 41663190  | 0.000 | 0.000 |
| 1 | 5 | 42222760  | 0.000 | 0.197 |
| 1 | 5 | 45194560  | 0.000 | 0.296 |
| 2 | 5 | 4579966   | 0.545 | 0.000 |
| 1 | 5 | 53160317  | 0.000 | 0.310 |
| 2 | 5 | 56387833  | 0.368 | 0.271 |
| 1 | 5 | 5721155   | 0.000 | 0.407 |
| 2 | 5 | 63548792  | 0.577 | 0.000 |
| 2 | 5 | 6643035   | 0.421 | 0.000 |
| 2 | 5 | 69055388  | 0.372 | 0.263 |

|   |   |           |       |       |
|---|---|-----------|-------|-------|
| 1 | 5 | 72404389  | 0.000 | 0.000 |
| 1 | 5 | 7425190   | 0.000 | 0.000 |
| 2 | 5 | 75285945  | 0.513 | 0.078 |
| 2 | 5 | 7817145   | 0.327 | 0.000 |
| 2 | 5 | 79269736  | 0.533 | 0.271 |
| 2 | 5 | 81377269  | 0.424 | 0.310 |
| 1 | 5 | 85129366  | 0.000 | 0.235 |
| 2 | 5 | 85688616  | 0.741 | 0.000 |
| 2 | 5 | 91742536  | 0.593 | 0.000 |
| 1 | 5 | 9500811   | 0.000 | 0.000 |
| 2 | 5 | 95231337  | 0.392 | 0.000 |
| 2 | 5 | 95701747  | 0.715 | 0.280 |
| 2 | 5 | 97765568  | 0.201 | 0.000 |
| 1 | 6 | 101437584 | 0.000 | 0.094 |
| 1 | 6 | 102787939 | 0.000 | 0.000 |
| 2 | 6 | 103570525 | 0.381 | 0.362 |
| 1 | 6 | 105574693 | 0.000 | 0.629 |
| 1 | 6 | 110560428 | 0.000 | 0.362 |
| 2 | 6 | 111252036 | 0.485 | 0.000 |
| 1 | 6 | 115939145 | 0.000 | 0.620 |
| 2 | 6 | 117652832 | 0.181 | 0.255 |
| 2 | 6 | 123368975 | 0.092 | 0.000 |
| 2 | 6 | 124380080 | 0.800 | 0.000 |
| 2 | 6 | 126389883 | 0.086 | 0.519 |
| 2 | 6 | 131059163 | 0.351 | 0.000 |
| 2 | 6 | 131399570 | 0.406 | 0.372 |
| 1 | 6 | 132482937 | 0.000 | 0.064 |
| 2 | 6 | 145547033 | 0.410 | 0.062 |
| 1 | 6 | 153868755 | 0.000 | 0.329 |
| 1 | 6 | 155942473 | 0.000 | 0.000 |
| 1 | 6 | 1850433   | 0.000 | 1.067 |
| 1 | 6 | 18553216  | 0.000 | 0.000 |
| 1 | 6 | 20182475  | 0.000 | 0.223 |
| 1 | 6 | 23725753  | 0.000 | 0.643 |
| 1 | 6 | 23820823  | 0.000 | 0.000 |
| 1 | 6 | 33355096  | 0.000 | 0.197 |
| 1 | 6 | 40322738  | 0.000 | 0.103 |
| 2 | 6 | 40934220  | 0.638 | 0.000 |
| 1 | 6 | 45795560  | 0.000 | 0.362 |
| 2 | 6 | 46776061  | 0.232 | 0.000 |
| 2 | 6 | 46995372  | 0.406 | 0.827 |
| 1 | 6 | 49245413  | 0.000 | 0.000 |

|   |   |           |       |       |
|---|---|-----------|-------|-------|
| 1 | 6 | 49866189  | 0.000 | 0.280 |
| 2 | 6 | 60497665  | 0.208 | 0.000 |
| 2 | 6 | 62533854  | 0.585 | 0.445 |
| 2 | 6 | 70161977  | 0.558 | 0.000 |
| 2 | 6 | 71671466  | 0.067 | 0.322 |
| 2 | 6 | 7238595   | 0.415 | 0.000 |
| 1 | 6 | 73054903  | 0.000 | 0.362 |
| 1 | 6 | 78332113  | 0.000 | 0.526 |
| 1 | 6 | 80558206  | 0.000 | 0.543 |
| 2 | 6 | 9330828   | 0.267 | 0.109 |
| 2 | 6 | 93696846  | 0.310 | 0.290 |
| 2 | 6 | 95778674  | 0.274 | 0.326 |
| 1 | 7 | 10181486  | 0.000 | 0.000 |
| 2 | 7 | 102065090 | 0.301 | 0.452 |
| 1 | 7 | 108865841 | 0.000 | 0.255 |
| 2 | 7 | 110615318 | 0.464 | 0.000 |
| 1 | 7 | 111235913 | 0.000 | 0.318 |
| 1 | 7 | 116155279 | 0.000 | 0.000 |
| 2 | 7 | 122016458 | 0.381 | 0.043 |
| 2 | 7 | 124142825 | 0.323 | 0.000 |
| 1 | 7 | 134178896 | 0.000 | 0.322 |
| 2 | 7 | 137296579 | 0.417 | 0.386 |
| 1 | 7 | 137739877 | 0.000 | 0.000 |
| 2 | 7 | 139519359 | 0.211 | 0.000 |
| 1 | 7 | 142637901 | 0.000 | 0.099 |
| 2 | 7 | 153528906 | 0.424 | 0.758 |
| 2 | 7 | 154611485 | 0.305 | 0.383 |
| 2 | 7 | 156931430 | 0.184 | 0.000 |
| 1 | 7 | 20905885  | 0.000 | 0.266 |
| 1 | 7 | 26002719  | 0.000 | 0.161 |
| 1 | 7 | 27125974  | 0.000 | 0.000 |
| 1 | 7 | 30124532  | 0.000 | 0.192 |
| 2 | 7 | 30831221  | 0.261 | 0.000 |
| 1 | 7 | 33443171  | 0.000 | 0.000 |
| 1 | 7 | 33920177  | 0.000 | 0.661 |
| 2 | 7 | 41732610  | 0.434 | 0.000 |
| 2 | 7 | 43378810  | 0.503 | 0.362 |
| 1 | 7 | 43433707  | 0.000 | 0.000 |
| 1 | 7 | 4358841   | 0.000 | 0.558 |
| 1 | 7 | 44053423  | 0.000 | 0.164 |
| 2 | 7 | 44090851  | 0.261 | 0.000 |
| 1 | 7 | 45053757  | 0.000 | 0.000 |

|   |   |           |       |       |
|---|---|-----------|-------|-------|
| 1 | 7 | 48916465  | 0.000 | 0.000 |
| 2 | 7 | 49269510  | 0.296 | 0.000 |
| 2 | 7 | 49269512  | 0.296 | 0.000 |
| 2 | 7 | 4979367   | 0.308 | 0.255 |
| 2 | 7 | 53091502  | 0.627 | 0.000 |
| 2 | 7 | 54587046  | 0.978 | 0.494 |
| 2 | 7 | 60485855  | 0.229 | 0.000 |
| 1 | 7 | 65590326  | 0.000 | 0.300 |
| 1 | 7 | 67521209  | 0.000 | 0.371 |
| 2 | 7 | 69630257  | 0.305 | 0.472 |
| 2 | 7 | 7056369   | 0.352 | 0.259 |
| 3 | 7 | 71219697  | 0.770 | 0.000 |
| 1 | 7 | 71503989  | 0.000 | 0.000 |
| 1 | 7 | 7383076   | 0.000 | 0.496 |
| 1 | 7 | 75784737  | 0.000 | 0.000 |
| 1 | 7 | 86130259  | 0.000 | 0.000 |
| 2 | 7 | 88505688  | 0.372 | 0.000 |
| 2 | 7 | 90565456  | 0.232 | 0.465 |
| 2 | 7 | 9227657   | 0.571 | 0.302 |
| 2 | 7 | 95205017  | 0.547 | 0.461 |
| 2 | 7 | 95298520  | 0.314 | 0.528 |
| 2 | 7 | 96055652  | 0.296 | 0.000 |
| 2 | 7 | 98561959  | 0.421 | 0.181 |
| 2 | 8 | 104362862 | 0.444 | 0.606 |
| 2 | 8 | 108043942 | 0.356 | 0.000 |
| 1 | 8 | 111647834 | 0.000 | 0.101 |
| 1 | 8 | 114563854 | 0.000 | 0.535 |
| 1 | 8 | 116551195 | 0.000 | 0.451 |
| 2 | 8 | 117615713 | 0.480 | 0.388 |
| 1 | 8 | 122234933 | 0.000 | 0.000 |
| 2 | 8 | 124975564 | 0.065 | 0.478 |
| 2 | 8 | 129273738 | 0.281 | 0.000 |
| 2 | 8 | 129372882 | 0.567 | 0.049 |
| 2 | 8 | 129733477 | 0.261 | 1.022 |
| 1 | 8 | 131552936 | 0.000 | 0.000 |
| 1 | 8 | 133562727 | 0.000 | 0.418 |
| 2 | 8 | 135261370 | 0.549 | 0.543 |
| 1 | 8 | 136497219 | 0.000 | 0.225 |
| 2 | 8 | 17691704  | 0.296 | 0.000 |
| 2 | 8 | 19550828  | 0.480 | 0.000 |
| 1 | 8 | 19798556  | 0.000 | 0.310 |
| 1 | 8 | 20863668  | 0.000 | 0.148 |

|   |   |           |       |       |
|---|---|-----------|-------|-------|
| 1 | 8 | 25151260  | 0.000 | 0.247 |
| 2 | 8 | 25892225  | 0.325 | 0.000 |
| 1 | 8 | 26940513  | 0.000 | 0.000 |
| 2 | 8 | 30978684  | 0.424 | 0.000 |
| 1 | 8 | 32400294  | 0.000 | 0.231 |
| 1 | 8 | 32524703  | 0.000 | 0.148 |
| 1 | 8 | 3391860   | 0.000 | 0.000 |
| 1 | 8 | 34194743  | 0.000 | 0.517 |
| 2 | 8 | 36379501  | 0.351 | 0.326 |
| 2 | 8 | 36570758  | 0.444 | 0.000 |
| 1 | 8 | 41188472  | 0.000 | 0.362 |
| 1 | 8 | 43877252  | 0.000 | 0.310 |
| 1 | 8 | 46315152  | 0.000 | 0.352 |
| 2 | 8 | 48680993  | 0.711 | 0.159 |
| 1 | 8 | 49102414  | 0.000 | 0.000 |
| 1 | 8 | 4997791   | 0.000 | 0.248 |
| 1 | 8 | 50264084  | 0.000 | 0.362 |
| 2 | 8 | 51711248  | 0.388 | 0.207 |
| 1 | 8 | 53427578  | 0.000 | 0.348 |
| 1 | 8 | 57557945  | 0.000 | 0.000 |
| 1 | 8 | 5826762   | 0.000 | 0.225 |
| 1 | 8 | 58506466  | 0.000 | 0.000 |
| 1 | 8 | 59792693  | 0.000 | 0.163 |
| 2 | 8 | 63967261  | 0.327 | 0.585 |
| 1 | 8 | 64469993  | 0.000 | 0.418 |
| 1 | 8 | 924933    | 0.000 | 0.090 |
| 1 | 8 | 98657310  | 0.000 | 0.000 |
| 2 | 9 | 101191229 | 0.218 | 1.048 |
| 1 | 9 | 10229559  | 0.000 | 0.000 |
| 1 | 9 | 102339974 | 0.000 | 0.000 |
| 2 | 9 | 102487319 | 0.690 | 0.290 |
| 1 | 9 | 102993672 | 0.000 | 0.434 |
| 1 | 9 | 103368304 | 0.000 | 0.560 |
| 1 | 9 | 104257777 | 0.000 | 0.163 |
| 1 | 9 | 104331598 | 0.000 | 0.000 |
| 1 | 9 | 105298502 | 0.000 | 0.000 |
| 2 | 9 | 111554985 | 0.274 | 0.189 |
| 2 | 9 | 118247951 | 0.086 | 0.000 |
| 1 | 9 | 118261593 | 0.000 | 0.117 |
| 2 | 9 | 120700338 | 0.604 | 0.000 |
| 2 | 9 | 122872477 | 0.491 | 0.139 |
| 1 | 9 | 124851965 | 0.000 | 0.000 |

|   |    |           |       |       |
|---|----|-----------|-------|-------|
| 2 | 9  | 125539853 | 0.254 | 0.000 |
| 1 | 9  | 12626664  | 0.000 | 0.000 |
| 2 | 9  | 127663224 | 0.174 | 0.000 |
| 1 | 9  | 12964481  | 0.000 | 0.000 |
| 2 | 9  | 131190221 | 0.698 | 0.255 |
| 1 | 9  | 131860557 | 0.000 | 0.000 |
| 2 | 9  | 14104419  | 0.519 | 0.323 |
| 2 | 9  | 1822815   | 0.511 | 0.630 |
| 2 | 9  | 19348792  | 0.410 | 0.114 |
| 1 | 9  | 21096138  | 0.000 | 0.965 |
| 1 | 9  | 23036773  | 0.000 | 0.819 |
| 2 | 9  | 23699353  | 0.250 | 0.000 |
| 1 | 9  | 24723875  | 0.000 | 0.372 |
| 1 | 9  | 24924904  | 0.000 | 0.000 |
| 2 | 9  | 28150104  | 0.235 | 0.217 |
| 1 | 9  | 38292964  | 0.000 | 0.000 |
| 2 | 9  | 395970    | 0.404 | 0.420 |
| 1 | 9  | 42290039  | 0.000 | 0.136 |
| 2 | 9  | 4316936   | 0.622 | 0.000 |
| 2 | 9  | 50071     | 0.143 | 0.000 |
| 1 | 9  | 5583708   | 0.000 | 0.338 |
| 1 | 9  | 595757    | 0.000 | 0.374 |
| 2 | 9  | 61566797  | 0.401 | 0.000 |
| 2 | 9  | 73087756  | 0.610 | 0.000 |
| 1 | 9  | 73452437  | 0.000 | 0.310 |
| 1 | 9  | 74317541  | 0.000 | 0.068 |
| 2 | 9  | 77004114  | 0.808 | 0.000 |
| 2 | 9  | 83484424  | 0.322 | 0.724 |
| 2 | 9  | 84858874  | 0.267 | 0.452 |
| 1 | 9  | 88848472  | 0.000 | 0.000 |
| 1 | 9  | 9208774   | 0.000 | 0.000 |
| 1 | 9  | 95722226  | 0.000 | 0.489 |
| 1 | 9  | 98676266  | 0.000 | 0.869 |
| 1 | 10 | 102661031 | 0.000 | 0.370 |
| 2 | 10 | 10849842  | 0.410 | 0.362 |
| 2 | 10 | 109091857 | 0.485 | 0.278 |
| 1 | 10 | 10933457  | 0.000 | 0.000 |
| 1 | 10 | 110609195 | 0.000 | 0.000 |
| 2 | 10 | 11168124  | 0.625 | 0.000 |
| 2 | 10 | 111830308 | 0.267 | 0.374 |
| 2 | 10 | 113814958 | 0.638 | 0.000 |
| 1 | 10 | 115355253 | 0.000 | 0.514 |



|   |    |           |       |       |
|---|----|-----------|-------|-------|
| 2 | 10 | 115409272 | 1.091 | 0.374 |
| 1 | 10 | 116513252 | 0.000 | 1.357 |
| 2 | 10 | 116526803 | 0.400 | 0.507 |
| 1 | 10 | 118845653 | 0.000 | 0.286 |
| 3 | 10 | 120224348 | 2.256 | 0.000 |
| 2 | 10 | 12067169  | 0.356 | 0.000 |
| 2 | 10 | 121613197 | 0.519 | 0.000 |
| 2 | 10 | 124588678 | 0.278 | 0.159 |
| 1 | 10 | 131096200 | 0.000 | 0.334 |
| 1 | 10 | 132055519 | 0.000 | 0.235 |
| 1 | 10 | 14501740  | 0.000 | 0.286 |
| 1 | 10 | 19776842  | 0.000 | 0.452 |
| 2 | 10 | 23617158  | 0.464 | 0.543 |
| 2 | 10 | 23958376  | 0.281 | 0.472 |
| 1 | 10 | 24984824  | 0.000 | 0.000 |
| 2 | 10 | 27864409  | 0.460 | 0.286 |
| 1 | 10 | 30158617  | 0.000 | 0.483 |
| 1 | 10 | 33849532  | 0.000 | 0.000 |
| 2 | 10 | 34892061  | 0.213 | 0.000 |
| 1 | 10 | 37826153  | 0.000 | 0.505 |
| 2 | 10 | 4183898   | 0.406 | 0.000 |
| 1 | 10 | 42358812  | 0.000 | 0.000 |
| 1 | 10 | 46311814  | 0.000 | 0.000 |
| 2 | 10 | 47221434  | 0.370 | 0.302 |
| 2 | 10 | 54174376  | 0.403 | 0.334 |
| 1 | 10 | 54568022  | 0.000 | 0.280 |
| 2 | 10 | 56140794  | 0.267 | 0.000 |
| 2 | 10 | 56950504  | 0.556 | 0.278 |
| 2 | 10 | 60147699  | 0.278 | 0.047 |
| 2 | 10 | 62705771  | 0.747 | 0.380 |
| 2 | 10 | 64210270  | 0.491 | 0.318 |
| 1 | 10 | 65525504  | 0.000 | 0.000 |
| 2 | 10 | 67571470  | 0.403 | 0.152 |
| 2 | 10 | 70021310  | 0.320 | 1.018 |
| 1 | 10 | 73104873  | 0.000 | 0.475 |
| 1 | 10 | 75129152  | 0.000 | 0.000 |
| 2 | 10 | 75905930  | 0.523 | 0.150 |
| 2 | 10 | 78393818  | 0.344 | 0.235 |
| 2 | 10 | 83492892  | 0.544 | 0.000 |
| 1 | 10 | 86750662  | 0.000 | 0.000 |
| 1 | 10 | 90700494  | 0.000 | 0.575 |
| 2 | 10 | 9239651   | 0.325 | 0.225 |

|   |    |           |       |       |
|---|----|-----------|-------|-------|
| 1 | 10 | 92770872  | 0.000 | 0.000 |
| 2 | 10 | 93187731  | 0.741 | 0.724 |
| 1 | 10 | 93234495  | 0.000 | 0.000 |
| 2 | 10 | 94576898  | 0.508 | 0.434 |
| 2 | 10 | 94950682  | 0.186 | 0.193 |
| 1 | 11 | 103587114 | 0.000 | 0.204 |
| 2 | 11 | 105917523 | 0.083 | 0.000 |
| 1 | 11 | 107071946 | 0.000 | 0.579 |
| 1 | 11 | 11456484  | 0.000 | 0.283 |
| 1 | 11 | 114708783 | 0.000 | 0.248 |
| 1 | 11 | 114958122 | 0.000 | 0.290 |
| 1 | 11 | 117410900 | 0.000 | 0.000 |
| 2 | 11 | 118973448 | 0.421 | 0.000 |
| 2 | 11 | 121731425 | 0.356 | 0.066 |
| 1 | 11 | 122025753 | 0.000 | 0.639 |
| 1 | 11 | 122979808 | 0.000 | 0.000 |
| 1 | 11 | 124291010 | 0.000 | 0.251 |
| 1 | 11 | 132785635 | 0.000 | 1.062 |
| 1 | 11 | 133338345 | 0.000 | 0.374 |
| 1 | 11 | 133761282 | 0.000 | 0.620 |
| 2 | 11 | 17634218  | 0.640 | 0.235 |
| 2 | 11 | 18214790  | 0.680 | 0.000 |
| 1 | 11 | 19063121  | 0.000 | 0.000 |
| 1 | 11 | 20315541  | 0.000 | 0.620 |
| 1 | 11 | 20325176  | 0.000 | 0.000 |
| 2 | 11 | 25629284  | 0.533 | 0.000 |
| 2 | 11 | 29268317  | 0.348 | 0.000 |
| 2 | 11 | 30414572  | 0.434 | 0.255 |
| 1 | 11 | 36738318  | 0.000 | 0.181 |
| 2 | 11 | 40970112  | 0.271 | 0.000 |
| 2 | 11 | 42181489  | 0.444 | 0.000 |
| 2 | 11 | 4222159   | 0.148 | 0.000 |
| 1 | 11 | 42391773  | 0.000 | 0.383 |
| 2 | 11 | 42992114  | 0.276 | 0.109 |
| 1 | 11 | 44879657  | 0.000 | 0.414 |
| 2 | 11 | 49443145  | 0.457 | 0.271 |
| 2 | 11 | 59547928  | 0.148 | 0.000 |
| 2 | 11 | 62907973  | 0.696 | 0.310 |
| 2 | 11 | 6802600   | 0.600 | 0.526 |
| 2 | 11 | 69424352  | 0.430 | 0.181 |
| 2 | 11 | 70172132  | 0.556 | 0.000 |
| 2 | 11 | 71917009  | 0.406 | 0.000 |

|   |    |           |       |       |
|---|----|-----------|-------|-------|
| 2 | 11 | 78991748  | 0.696 | 0.255 |
| 1 | 11 | 81625515  | 0.000 | 0.121 |
| 1 | 11 | 82375060  | 0.000 | 0.704 |
| 1 | 11 | 83760647  | 0.000 | 0.646 |
| 2 | 11 | 83859358  | 0.242 | 0.000 |
| 1 | 11 | 8836985   | 0.000 | 0.263 |
| 1 | 11 | 88442713  | 0.000 | 0.056 |
| 2 | 11 | 89364256  | 0.314 | 0.056 |
| 1 | 11 | 91384045  | 0.000 | 0.461 |
| 2 | 11 | 92625315  | 0.296 | 0.000 |
| 1 | 11 | 93116767  | 0.000 | 0.334 |
| 2 | 11 | 93572399  | 0.583 | 0.117 |
| 2 | 11 | 98979001  | 0.355 | 0.000 |
| 2 | 11 | 99123208  | 0.441 | 0.000 |
| 1 | 12 | 100396583 | 0.000 | 0.114 |
| 2 | 12 | 101478301 | 0.317 | 0.000 |
| 1 | 12 | 105124962 | 0.000 | 0.247 |
| 1 | 12 | 109600533 | 0.000 | 0.000 |
| 2 | 12 | 111703138 | 0.356 | 0.517 |
| 2 | 12 | 112201473 | 0.978 | 0.000 |
| 1 | 12 | 113992218 | 0.000 | 0.362 |
| 1 | 12 | 114026760 | 0.000 | 0.000 |
| 1 | 12 | 115283072 | 0.000 | 0.557 |
| 1 | 12 | 126210035 | 0.000 | 0.000 |
| 1 | 12 | 128451756 | 0.000 | 0.000 |
| 1 | 12 | 129158414 | 0.000 | 0.101 |
| 2 | 12 | 129194036 | 0.260 | 0.743 |
| 2 | 12 | 129699976 | 0.533 | 0.000 |
| 2 | 12 | 130201343 | 0.571 | 0.000 |
| 2 | 12 | 132658754 | 0.387 | 0.000 |
| 1 | 12 | 18037838  | 0.000 | 0.114 |
| 1 | 12 | 20532321  | 0.000 | 0.334 |
| 2 | 12 | 27135862  | 0.333 | 0.229 |
| 1 | 12 | 32986809  | 0.000 | 0.111 |
| 2 | 12 | 37544249  | 0.533 | 0.000 |
| 1 | 12 | 38746830  | 0.000 | 0.000 |
| 2 | 12 | 39556427  | 0.474 | 0.000 |
| 2 | 12 | 45801804  | 0.271 | 0.399 |
| 2 | 12 | 47093368  | 0.444 | 0.226 |
| 2 | 12 | 54193118  | 0.274 | 0.124 |
| 2 | 12 | 61096059  | 0.390 | 0.310 |
| 2 | 12 | 6117683   | 0.107 | 0.514 |

|   |    |           |       |       |
|---|----|-----------|-------|-------|
| 1 | 12 | 61470230  | 0.000 | 0.000 |
| 1 | 12 | 6307820   | 0.000 | 0.000 |
| 2 | 12 | 67241412  | 0.303 | 0.000 |
| 1 | 12 | 6789295   | 0.000 | 0.217 |
| 1 | 12 | 77504158  | 0.000 | 0.145 |
| 1 | 12 | 78382902  | 0.000 | 0.814 |
| 1 | 12 | 79065377  | 0.000 | 0.404 |
| 2 | 12 | 80465550  | 0.209 | 0.041 |
| 1 | 12 | 80780558  | 0.000 | 0.263 |
| 1 | 12 | 8205043   | 0.000 | 0.894 |
| 1 | 12 | 84484910  | 0.000 | 0.000 |
| 1 | 12 | 87232193  | 0.000 | 0.698 |
| 1 | 12 | 87810848  | 0.000 | 0.000 |
| 1 | 12 | 88071791  | 0.000 | 0.000 |
| 1 | 12 | 90780665  | 0.000 | 0.911 |
| 1 | 12 | 95719552  | 0.000 | 0.213 |
| 2 | 12 | 96021004  | 0.222 | 0.931 |
| 1 | 12 | 96233025  | 0.000 | 0.746 |
| 2 | 12 | 99195605  | 0.356 | 0.000 |
| 1 | 13 | 106932614 | 0.000 | 0.217 |
| 1 | 13 | 109688927 | 0.000 | 0.000 |
| 2 | 13 | 112177050 | 0.588 | 0.241 |
| 1 | 13 | 112351281 | 0.000 | 0.000 |
| 2 | 13 | 19458900  | 0.200 | 0.181 |
| 2 | 13 | 21198801  | 0.296 | 0.000 |
| 2 | 13 | 21198803  | 0.505 | 0.277 |
| 2 | 13 | 22486341  | 0.667 | 0.202 |
| 2 | 13 | 24407230  | 0.424 | 0.000 |
| 2 | 13 | 35458160  | 0.800 | 0.106 |
| 2 | 13 | 44807574  | 0.290 | 0.000 |
| 2 | 13 | 51185115  | 0.274 | 0.000 |
| 1 | 13 | 51338069  | 0.000 | 0.181 |
| 2 | 13 | 54356322  | 0.222 | 0.000 |
| 2 | 13 | 57950093  | 0.923 | 0.000 |
| 2 | 13 | 60127004  | 0.889 | 0.181 |
| 2 | 13 | 61979712  | 0.208 | 0.070 |
| 1 | 13 | 64005202  | 0.000 | 0.000 |
| 1 | 13 | 68771491  | 0.000 | 0.000 |
| 1 | 13 | 81289794  | 0.000 | 0.310 |
| 2 | 13 | 86387551  | 0.333 | 0.633 |
| 1 | 13 | 95505939  | 0.000 | 0.000 |
| 2 | 14 | 81424362  | 0.598 | 0.383 |

|   |    |          |       |       |
|---|----|----------|-------|-------|
| 1 | 14 | 87098315 | 0.000 | 0.668 |
| 2 | 14 | 87211954 | 0.390 | 0.000 |
| 1 | 14 | 94965692 | 0.000 | 0.271 |
| 1 | 14 | 96647102 | 0.000 | 0.000 |
| 1 | 14 | 99920248 | 0.000 | 0.000 |
| 1 | 15 | 25046210 | 0.000 | 0.000 |
| 2 | 15 | 25170693 | 0.248 | 0.000 |
| 1 | 15 | 26017195 | 0.000 | 0.000 |
| 1 | 15 | 45848202 | 0.000 | 0.000 |
| 1 | 15 | 48080087 | 0.000 | 0.302 |
| 1 | 15 | 48928081 | 0.000 | 0.000 |
| 2 | 15 | 56330772 | 0.406 | 0.310 |
| 1 | 15 | 60120205 | 0.000 | 0.174 |
| 1 | 15 | 60352764 | 0.000 | 0.281 |
| 2 | 15 | 60956234 | 0.327 | 0.343 |
| 2 | 15 | 63420915 | 0.325 | 0.582 |
| 1 | 15 | 72502854 | 0.000 | 0.691 |
| 1 | 15 | 77267388 | 0.000 | 0.420 |
| 1 | 15 | 80681168 | 0.000 | 0.226 |
| 2 | 15 | 80950475 | 0.497 | 0.045 |
| 1 | 15 | 83132180 | 0.000 | 0.000 |
| 2 | 15 | 83158851 | 0.344 | 0.161 |
| 1 | 15 | 87983261 | 0.000 | 0.000 |
| 1 | 15 | 95004101 | 0.000 | 0.000 |
| 2 | 15 | 96972773 | 0.390 | 0.207 |
| 2 | 15 | 99025033 | 0.323 | 0.326 |
| 1 | 16 | 1550273  | 0.000 | 0.000 |
| 1 | 16 | 18537225 | 0.000 | 0.000 |
| 1 | 16 | 20424714 | 0.000 | 0.000 |
| 2 | 16 | 22306291 | 0.600 | 0.000 |
| 1 | 16 | 22677228 | 0.000 | 0.283 |
| 2 | 16 | 25681378 | 0.232 | 0.290 |
| 2 | 16 | 3192939  | 0.311 | 0.475 |
| 2 | 16 | 34085953 | 0.946 | 0.350 |
| 2 | 16 | 35232723 | 0.570 | 0.000 |
| 2 | 16 | 47099927 | 0.325 | 0.000 |
| 2 | 16 | 47823047 | 0.174 | 0.000 |
| 2 | 16 | 48066801 | 0.622 | 0.592 |
| 1 | 16 | 50321074 | 0.000 | 0.062 |
| 2 | 16 | 51823583 | 0.213 | 0.760 |
| 2 | 16 | 52276870 | 0.261 | 0.000 |
| 1 | 16 | 5534803  | 0.000 | 0.434 |

|   |    |          |       |       |
|---|----|----------|-------|-------|
| 1 | 16 | 57821035 | 0.000 | 0.402 |
| 2 | 16 | 61886296 | 0.230 | 0.000 |
| 2 | 16 | 64432341 | 0.232 | 0.000 |
| 2 | 16 | 64614439 | 0.427 | 0.452 |
| 1 | 16 | 64699930 | 0.000 | 0.000 |
| 2 | 16 | 64919655 | 0.174 | 0.391 |
| 2 | 16 | 66602481 | 0.250 | 0.046 |
| 1 | 16 | 67105628 | 0.000 | 0.465 |
| 2 | 16 | 67608941 | 0.081 | 0.000 |
| 1 | 16 | 69148663 | 0.000 | 0.000 |
| 1 | 16 | 70802883 | 0.000 | 0.395 |
| 2 | 16 | 71030715 | 0.254 | 0.345 |
| 2 | 16 | 7113874  | 0.195 | 0.395 |
| 2 | 16 | 72362589 | 0.505 | 0.434 |
| 2 | 16 | 7450654  | 0.857 | 0.286 |
| 1 | 16 | 77256710 | 0.000 | 0.000 |
| 1 | 16 | 77493285 | 0.000 | 0.362 |
| 2 | 16 | 77781037 | 0.370 | 0.287 |
| 1 | 16 | 82066056 | 0.000 | 0.000 |
| 1 | 16 | 82874338 | 0.000 | 0.229 |
| 2 | 16 | 83070380 | 0.667 | 0.109 |
| 3 | 16 | 85313584 | 0.912 | 0.981 |
| 2 | 16 | 86284090 | 0.194 | 0.334 |
| 1 | 16 | 9532674  | 0.000 | 0.000 |
| 1 | 17 | 10363095 | 0.000 | 0.212 |
| 1 | 17 | 10978272 | 0.000 | 0.241 |
| 1 | 17 | 14670774 | 0.000 | 0.000 |
| 2 | 17 | 14728731 | 0.267 | 0.000 |
| 1 | 17 | 30755275 | 0.000 | 0.000 |
| 1 | 17 | 31863521 | 0.000 | 0.000 |
| 2 | 17 | 32918315 | 0.686 | 0.225 |
| 2 | 17 | 34590397 | 0.722 | 0.307 |
| 1 | 17 | 34811921 | 0.000 | 0.060 |
| 2 | 17 | 34849723 | 0.247 | 0.362 |
| 1 | 17 | 40381174 | 0.000 | 0.000 |
| 1 | 17 | 41094327 | 0.000 | 0.000 |
| 2 | 17 | 41287213 | 0.348 | 0.822 |
| 1 | 17 | 41488518 | 0.000 | 0.347 |
| 1 | 17 | 41662731 | 0.000 | 0.271 |
| 1 | 17 | 4511744  | 0.000 | 0.248 |
| 2 | 17 | 48780087 | 0.567 | 0.543 |
| 1 | 17 | 4976602  | 0.000 | 0.000 |

|   |    |          |       |       |
|---|----|----------|-------|-------|
| 1 | 17 | 52148573 | 0.000 | 0.000 |
| 2 | 17 | 52202053 | 0.092 | 0.000 |
| 1 | 17 | 59529075 | 0.000 | 0.000 |
| 1 | 17 | 63728030 | 0.000 | 0.000 |
| 1 | 17 | 64448232 | 0.000 | 0.000 |
| 2 | 17 | 72065475 | 0.566 | 0.000 |
| 2 | 17 | 73729002 | 0.296 | 0.000 |
| 1 | 17 | 74236263 | 0.000 | 0.000 |
| 2 | 17 | 78164605 | 0.333 | 0.420 |
| 2 | 17 | 8080028  | 0.364 | 0.388 |
| 2 | 17 | 82853402 | 0.427 | 0.322 |
| 2 | 17 | 9019997  | 0.310 | 0.000 |
| 1 | 17 | 9021059  | 0.000 | 0.271 |
| 1 | 18 | 14791710 | 0.000 | 0.000 |
| 1 | 18 | 15293364 | 0.000 | 0.112 |
| 2 | 18 | 27867692 | 0.577 | 0.000 |
| 2 | 18 | 29896712 | 0.351 | 0.000 |
| 2 | 18 | 50652311 | 0.242 | 0.339 |
| 2 | 18 | 51531692 | 0.296 | 0.197 |
| 1 | 18 | 524695   | 0.000 | 0.000 |
| 2 | 18 | 52758063 | 0.718 | 0.395 |
| 1 | 18 | 56544081 | 0.000 | 0.319 |
| 2 | 18 | 57470379 | 0.404 | 0.000 |
| 1 | 18 | 58043724 | 0.000 | 0.452 |
| 1 | 18 | 61155354 | 0.000 | 0.271 |
| 1 | 18 | 61706959 | 0.000 | 0.217 |
| 2 | 18 | 63454630 | 0.271 | 0.000 |
| 1 | 18 | 63887009 | 0.000 | 0.334 |
| 1 | 18 | 67455918 | 0.000 | 0.000 |
| 2 | 18 | 68909930 | 0.325 | 0.345 |
| 2 | 18 | 70340966 | 0.496 | 0.263 |
| 1 | 18 | 74237595 | 0.000 | 0.370 |
| 2 | 18 | 75784106 | 0.496 | 0.724 |
| 1 | 18 | 75984267 | 0.000 | 0.000 |
| 1 | 18 | 8101586  | 0.000 | 0.000 |
| 1 | 18 | 924915   | 0.000 | 0.445 |
| 2 | 18 | 9601220  | 0.491 | 0.566 |
| 2 | 19 | 10065329 | 0.571 | 0.494 |
| 3 | 19 | 12943750 | 0.687 | 0.000 |
| 2 | 19 | 16234332 | 0.424 | 0.193 |
| 1 | 19 | 19549515 | 0.000 | 0.901 |
| 1 | 19 | 22624713 | 0.000 | 0.136 |

|   |    |          |       |       |
|---|----|----------|-------|-------|
| 2 | 19 | 22883084 | 0.982 | 0.000 |
| 2 | 19 | 22892036 | 0.649 | 0.246 |
| 1 | 19 | 27496424 | 0.000 | 0.651 |
| 2 | 19 | 27753864 | 0.333 | 0.672 |
| 1 | 19 | 28110861 | 0.000 | 0.457 |
| 2 | 19 | 28326785 | 0.821 | 0.197 |
| 1 | 19 | 31656627 | 0.000 | 0.062 |
| 2 | 19 | 3661315  | 0.410 | 0.343 |
| 1 | 19 | 38958665 | 0.000 | 0.519 |
| 2 | 19 | 40522348 | 0.250 | 0.452 |
| 1 | 19 | 41492820 | 0.000 | 0.000 |
| 2 | 19 | 48040435 | 0.415 | 0.300 |
| 1 | 19 | 53377680 | 0.000 | 0.524 |
| 2 | 19 | 7346680  | 0.325 | 0.000 |
| 1 | 19 | 8086471  | 0.000 | 0.987 |
| 1 | 20 | 12995529 | 0.000 | 0.414 |
| 2 | 20 | 13915926 | 0.323 | 0.543 |
| 1 | 20 | 14336990 | 0.000 | 0.334 |
| 1 | 20 | 21629260 | 0.000 | 0.383 |
| 1 | 20 | 22689135 | 0.000 | 0.000 |
| 2 | 20 | 28497717 | 0.125 | 0.000 |
| 2 | 20 | 39766967 | 0.260 | 0.434 |
| 1 | 20 | 39854921 | 0.000 | 0.000 |
| 2 | 20 | 44696207 | 0.430 | 0.000 |
| 2 | 20 | 45737606 | 0.213 | 0.293 |
| 1 | 20 | 48547263 | 0.000 | 0.045 |
| 1 | 20 | 50715766 | 0.000 | 0.404 |
| 1 | 20 | 50895064 | 0.000 | 0.000 |
| 1 | 20 | 52629042 | 0.000 | 0.223 |
| 2 | 20 | 53076039 | 0.513 | 0.000 |
| 2 | 20 | 55145960 | 0.533 | 0.271 |
| 1 | 20 | 64283610 | 0.000 | 0.000 |
| 2 | 21 | 10536357 | 0.362 | 0.000 |
| 1 | 21 | 24993236 | 0.000 | 0.079 |
| 2 | 21 | 25235168 | 0.667 | 0.132 |
| 2 | 21 | 26121394 | 0.397 | 0.378 |
| 2 | 21 | 27842645 | 0.286 | 0.000 |
| 2 | 21 | 28932587 | 0.260 | 0.899 |
| 2 | 21 | 31309695 | 0.186 | 0.449 |
| 2 | 21 | 32999596 | 0.267 | 0.000 |
| 2 | 21 | 35666262 | 0.496 | 0.475 |
| 1 | 21 | 36182754 | 0.000 | 0.000 |



|   |    |          |       |       |
|---|----|----------|-------|-------|
| 2 | 21 | 37443516 | 0.063 | 0.157 |
| 1 | 21 | 40180743 | 0.000 | 0.000 |
| 1 | 21 | 40558302 | 0.000 | 0.000 |
| 2 | 21 | 42078747 | 0.119 | 0.259 |
| 1 | 21 | 46037210 | 0.000 | 0.511 |
| 1 | 22 | 11356944 | 0.075 | 0.000 |
| 2 | 22 | 20582589 | 1.143 | 0.000 |
| 1 | 22 | 32657960 | 0.000 | 0.326 |
| 2 | 22 | 33353441 | 0.260 | 0.286 |
| 1 | 22 | 34793591 | 0.000 | 0.000 |
| 2 | 22 | 37322215 | 0.360 | 0.000 |
| 1 | 22 | 37961231 | 0.000 | 0.000 |
| 1 | 22 | 42966759 | 0.000 | 0.170 |
| 2 | 22 | 44313831 | 0.545 | 0.452 |
| 2 | 22 | 45732457 | 0.278 | 0.703 |
| 1 | 22 | 48568894 | 0.000 | 0.302 |

Note: Results from multidimensional Bayesian Dirichlet Process-based mutation clustering. Columns *CCF\_in\_Twin\_A* and *CCF\_in\_Twin\_B* show for each cluster in each twin the proportion of tumour cells that the cluster represents. CCF, cancer cell fraction.

**Supplementary Table 12. Additional candidate cancer genes**

| <b>Gene</b>   |              |                |                |
|---------------|--------------|----------------|----------------|
| <i>ABL2</i>   | <i>EP300</i> | <i>MKL1</i>    | <i>RAD21</i>   |
| <i>AFF3</i>   | <i>ERCC2</i> | <i>MLL</i>     | <i>RB1</i>     |
| <i>APC</i>    | <i>ETV6</i>  | <i>MLL2</i>    | <i>RET</i>     |
| <i>AR</i>     | <i>EZH2</i>  | <i>MLL3</i>    | <i>RUNX1</i>   |
| <i>ARID2</i>  | <i>FBXW7</i> | <i>MLL5</i>    | <i>SDHAF2</i>  |
| <i>ASXL1</i>  | <i>FLT3</i>  | <i>MPL</i>     | <i>SF1</i>     |
| <i>ATE1</i>   | <i>FOXP1</i> | <i>MYC</i>     | <i>SF3A1</i>   |
| <i>ATM</i>    | <i>GATA2</i> | <i>MYD88</i>   | <i>SF3B1</i>   |
| <i>ATRX</i>   | <i>GNAS</i>  | <i>MYO5A</i>   | <i>SH2B3</i>   |
| <i>BCOR</i>   | <i>GNB1</i>  | <i>NF1</i>     | <i>SRSF2</i>   |
| <i>BRAF</i>   | <i>IDH1</i>  | <i>NOTCH1</i>  | <i>STAG2</i>   |
| <i>CALR</i>   | <i>IDH2</i>  | <i>NPM1</i>    | <i>STAT3</i>   |
| <i>CBL</i>    | <i>IKZF1</i> | <i>NRAS</i>    | <i>TET2</i>    |
| <i>CBLB</i>   | <i>JAK2</i>  | <i>PABPC1</i>  | <i>TMEM127</i> |
| <i>CDKN2A</i> | <i>KDM5A</i> | <i>PHF6</i>    | <i>TP53</i>    |
| <i>CEBPA</i>  | <i>KDM5C</i> | <i>PPARG</i>   | <i>TP63</i>    |
| <i>CHEK2</i>  | <i>KDM6A</i> | <i>PPM1D</i>   | <i>U2AF1</i>   |
| <i>CREBBP</i> | <i>KIT</i>   | <i>PRPF40B</i> | <i>WT1</i>     |
| <i>CUX1</i>   | <i>KMT2C</i> | <i>PTEN</i>    | <i>ZRSR2</i>   |
| <i>DNM2</i>   | <i>KRAS</i>  | <i>PTPN11</i>  |                |
| <i>DNMT3A</i> | <i>LZTR1</i> | <i>PTPRD</i>   |                |

Note: Additional gene list for putative driver mutation analyses. Curated list based on literature support for genes associated with blood cancer risk of biology.<sup>44-46</sup> Gene names are listed in alphabetical order and provided in italics in accordance with the current HUGO Gene Nomenclature Committee (HGNC) guidelines.<sup>50</sup>

***APPENDIX A. Reporting Summary***
